# Supplementary material for: Discovery of Natural Dimeric Naphthopyrones as Potential Cytotoxic Agents through ROS-Mediated Apoptotic Pathway
Source: PubMed Central journal article supplement (PMC6520789; doi:10.3390/md17040207), 2019-04-02
Supplement: marinedrugs-17-00207-s001.pdf [file marinedrugs-17-00207-s001.pdf]

## Supplementary Materials

# Discovery of Natural Dimeric Naphthopyrones as Potential Cytotoxic Agents Through ROS-mediated Apoptotic Pathway

Kuo Xu <sup>1,†</sup>, Chuanlong Guo <sup>1,2,†</sup>, Jie Meng <sup>1,4</sup>, Haiying Tian <sup>5</sup>, Shuju Guo <sup>1,\*</sup> and Dayong Shi <sup>1,3,\*</sup>

<sup>1</sup> Chinese Academy of Sciences Key Laboratory of Experimental Marine Biology, Institute of Oceanology, Chinese Academy of Sciences, Qingdao 266071, China; [xukuoworld@126.com](mailto:xukuoworld@126.com) (K.X.); [gcl\\_cpu@126.com](mailto:gcl_cpu@126.com) (C.G.); [mengjie@qibebt.ac.cn](mailto:mengjie@qibebt.ac.cn) (J.M.)

<sup>2</sup> Department of Pharmacy, College of Chemical Engineering, Qingdao University of Science and Technology, Qingdao 266042, China

<sup>3</sup> State Key Laboratory of Microbial Technology, School of Life Science, Shandong University, No. 72 Binhai Road, Qingdao 266237, China

<sup>4</sup> College of Resources and Environment, Qingdao Agricultural University, Qingdao 266109, China;

<sup>5</sup> Technology Center, China Tobacco Henan Industrial Co., Ltd., Zhengzhou, 450000, China; [13623810925@126.com](mailto:13623810925@126.com)

\* Correspondence: [guoshuju@qdio.ac.cn](mailto:guoshuju@qdio.ac.cn) (S.G.); [shidayong@qdio.ac.cn](mailto:shidayong@qdio.ac.cn) (D.S.); Tel.: +86-532-82898741 (S.G.); +86-532-82898719 (D.S.)

† These authors contributed equally to this work.

### Table of Contents

| NO.        | Contents                                                                                 | Page |
|------------|------------------------------------------------------------------------------------------|------|
| Figure S1  | The UV spectrum of <b>1</b> in MeOH                                                      | S4   |
| Figure S2  | The ECD spectrum of <b>1</b> in MeOH                                                     | S4   |
| Figure S3  | The HR-ESI-MS data of <b>1</b>                                                           | S5   |
| Figure S4  | The IR spectrum (KBr) of <b>1</b>                                                        | S5   |
| Figure S5  | The <sup>1</sup> H NMR spectrum (600 MHz) of <b>1</b> in DMSO- <i>d</i> <sub>6</sub>     | S6   |
| Figure S6  | The <sup>13</sup> C NMR spectrum (150 MHz) of <b>1</b> in DMSO- <i>d</i> <sub>6</sub>    | S6   |
| Figure S7  | The HSQC spectrum (600 MHz) of <b>1</b> in DMSO- <i>d</i> <sub>6</sub>                   | S7   |
| Figure S8  | The HMBC spectrum (600 MHz) of <b>1</b> in DMSO- <i>d</i> <sub>6</sub>                   | S7   |
| Figure S9  | The HR-ESI-MS data of <b>2</b>                                                           | S8   |
| Figure S10 | The <sup>1</sup> H NMR spectrum (600 MHz) of <b>2</b> in DMSO- <i>d</i> <sub>6</sub>     | S8   |
| Figure S11 | The <sup>13</sup> C NMR spectrum (150 MHz) of <b>2</b> in DMSO- <i>d</i> <sub>6</sub>    | S9   |
| Figure S12 | The HR-ESI-MS data of <b>3</b>                                                           | S9   |
| Figure S13 | The <sup>1</sup> H NMR spectrum (600 MHz) of <b>3</b> in acetone- <i>d</i> <sub>6</sub>  | S10  |
| Figure S14 | The <sup>13</sup> C NMR spectrum (150 MHz) of <b>3</b> in acetone- <i>d</i> <sub>6</sub> | S10  |
| Figure S15 | The HR-ESI-MS data of <b>4</b>                                                           | S11  |
| Figure S16 | The <sup>1</sup> H NMR spectrum (600 MHz) of <b>4</b> in acetone- <i>d</i> <sub>6</sub>  | S11  |
| Figure S17 | The <sup>13</sup> C NMR spectrum (150 MHz) of <b>4</b> in acetone- <i>d</i> <sub>6</sub> | S12  |

|                   |                                                                                           |     |
|-------------------|-------------------------------------------------------------------------------------------|-----|
| <b>Figure S18</b> | The HR-ESI-MS data of <b>5</b>                                                            | S12 |
| <b>Figure S19</b> | The <sup>1</sup> H NMR spectrum (600 MHz) of <b>5</b> in CDCl <sub>3</sub>                | S13 |
| <b>Figure S20</b> | The <sup>13</sup> C NMR spectrum (150 MHz) of <b>5</b> in CDCl <sub>3</sub>               | S13 |
| <b>Figure S21</b> | The HR-ESI-MS data of <b>6</b>                                                            | S14 |
| <b>Figure S22</b> | The <sup>1</sup> H NMR spectrum (600 MHz) of <b>6</b> in acetone- <i>d</i> <sub>6</sub>   | S14 |
| <b>Figure S23</b> | The <sup>13</sup> C NMR spectrum (150 MHz) of <b>6</b> in acetone- <i>d</i> <sub>6</sub>  | S15 |
| <b>Figure S24</b> | The HR-ESI-MS data of <b>7</b>                                                            | S15 |
| <b>Figure S25</b> | The <sup>1</sup> H NMR spectrum (600 MHz) of <b>7</b> in acetone- <i>d</i> <sub>6</sub>   | S16 |
| <b>Figure S26</b> | The <sup>13</sup> C NMR spectrum (150 MHz) of <b>7</b> in acetone- <i>d</i> <sub>6</sub>  | S16 |
| <b>Figure S27</b> | The HR-ESI-MS data of <b>8</b>                                                            | S17 |
| <b>Figure S28</b> | The <sup>1</sup> H NMR spectrum (600 MHz) of <b>8</b> in acetone- <i>d</i> <sub>6</sub>   | S17 |
| <b>Figure S29</b> | The <sup>13</sup> C NMR spectrum (150 MHz) of <b>8</b> in acetone- <i>d</i> <sub>6</sub>  | S18 |
| <b>Figure S30</b> | The HR-ESI-MS data of <b>9</b>                                                            | S18 |
| <b>Figure S31</b> | The <sup>1</sup> H NMR spectrum (600 MHz) of <b>9</b> in acetone- <i>d</i> <sub>6</sub>   | S19 |
| <b>Figure S32</b> | The <sup>13</sup> C NMR spectrum (150 MHz) of <b>9</b> in acetone- <i>d</i> <sub>6</sub>  | S19 |
| <b>Figure S33</b> | The HR-ESI-MS data of <b>10</b>                                                           | S20 |
| <b>Figure S34</b> | The <sup>1</sup> H NMR spectrum (600 MHz) of <b>10</b> in acetone- <i>d</i> <sub>6</sub>  | S20 |
| <b>Figure S35</b> | The <sup>13</sup> C NMR spectrum (150 MHz) of <b>10</b> in acetone- <i>d</i> <sub>6</sub> | S21 |
| <b>Figure S36</b> | The HR-ESI-MS data of <b>11</b>                                                           | S21 |
| <b>Figure S37</b> | The <sup>1</sup> H NMR spectrum (600 MHz) of <b>11</b> in acetone- <i>d</i> <sub>6</sub>  | S22 |
| <b>Figure S38</b> | The <sup>13</sup> C NMR spectrum (150 MHz) of <b>11</b> in acetone- <i>d</i> <sub>6</sub> | S22 |
| <b>Figure S39</b> | The HR-ESI-MS data of <b>12</b>                                                           | S23 |
| <b>Figure S40</b> | The ECD spectrum of <b>12</b> in MeOH                                                     | S23 |
| <b>Figure S41</b> | The <sup>1</sup> H NMR spectrum (600 MHz) of <b>12</b> in acetone- <i>d</i> <sub>6</sub>  | S24 |
| <b>Figure S42</b> | The <sup>13</sup> C NMR spectrum (150 MHz) of <b>12</b> in acetone- <i>d</i> <sub>6</sub> | S24 |
| <b>Figure S43</b> | The HR-ESI-MS data of <b>13</b>                                                           | S25 |
| <b>Figure S44</b> | The <sup>1</sup> H NMR spectrum (600 MHz) of <b>13</b> in acetone- <i>d</i> <sub>6</sub>  | S25 |
| <b>Figure S45</b> | The <sup>13</sup> C NMR spectrum (150 MHz) of <b>13</b> in acetone- <i>d</i> <sub>6</sub> | S26 |
| <b>Figure S46</b> | The HR-ESI-MS data of <b>14</b>                                                           | S26 |
| <b>Figure S47</b> | The <sup>1</sup> H NMR spectrum (600 MHz) of <b>14</b> in DMSO- <i>d</i> <sub>6</sub>     | S27 |
| <b>Figure S48</b> | The <sup>13</sup> C NMR spectrum (150 MHz) of <b>14</b> in DMSO- <i>d</i> <sub>6</sub>    | S27 |
| <b>Figure S49</b> | The HR-ESI-MS data of <b>15</b>                                                           | S28 |
| <b>Figure S50</b> | The <sup>1</sup> H NMR spectrum (600 MHz) of <b>15</b> in acetone- <i>d</i> <sub>6</sub>  | S28 |
| <b>Figure S51</b> | The <sup>13</sup> C NMR spectrum (150 MHz) of <b>15</b> in acetone- <i>d</i> <sub>6</sub> | S29 |
| <b>Figure S52</b> | The HR-ESI-MS data of <b>16</b>                                                           | S29 |

|                   |                                                                                           |         |
|-------------------|-------------------------------------------------------------------------------------------|---------|
| <b>Figure S53</b> | The <sup>1</sup> H NMR spectrum (600 MHz) of <b>16</b> in acetone- <i>d</i> <sub>6</sub>  | S30     |
| <b>Figure S54</b> | The <sup>13</sup> C NMR spectrum (150 MHz) of <b>16</b> in acetone- <i>d</i> <sub>6</sub> | S30     |
| <b>Figure S55</b> | The HR-ESI-MS data of <b>17</b>                                                           | S31     |
| <b>Figure S56</b> | The <sup>1</sup> H NMR spectrum (600 MHz) of <b>17</b> in acetone- <i>d</i> <sub>6</sub>  | S31     |
| <b>Figure S57</b> | The <sup>13</sup> C NMR spectrum (150 MHz) of <b>17</b> in acetone- <i>d</i> <sub>6</sub> | S32     |
| <b>Figure S58</b> | The HR-ESI-MS data of <b>18</b>                                                           | S32     |
| <b>Figure S59</b> | The <sup>1</sup> H NMR spectrum (600 MHz) of <b>18</b> in acetone- <i>d</i> <sub>6</sub>  | S33     |
| <b>Figure S60</b> | The <sup>13</sup> C NMR spectrum (150 MHz) of <b>18</b> in acetone- <i>d</i> <sub>6</sub> | S33     |
| —                 | General procedure for ECD calculations of compounds <b>1</b> and <b>12</b>                | S34–S36 |
| —                 | Analytical HPLC spectra for all isolated compounds ( <b>1–18</b> )                        | S37–S54 |

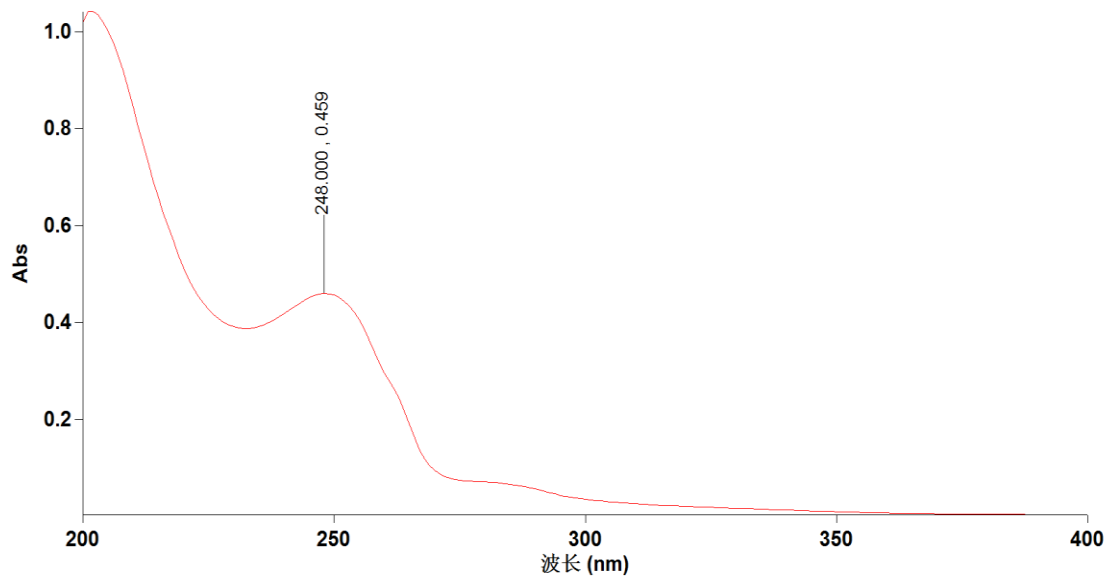

**Figure S1.** The UV spectrum of **1** in MeOH

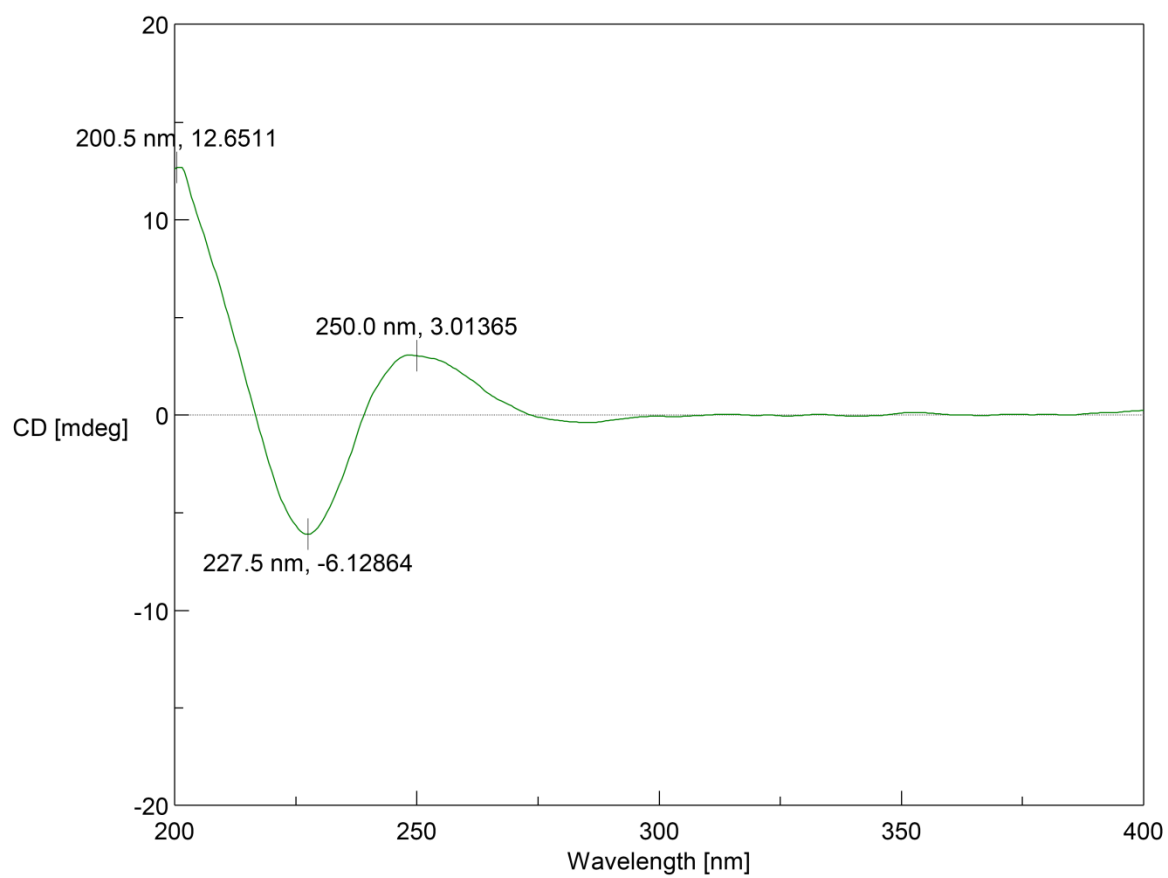

**Figure S2.** The ECD spectrum of **1** in MeOH

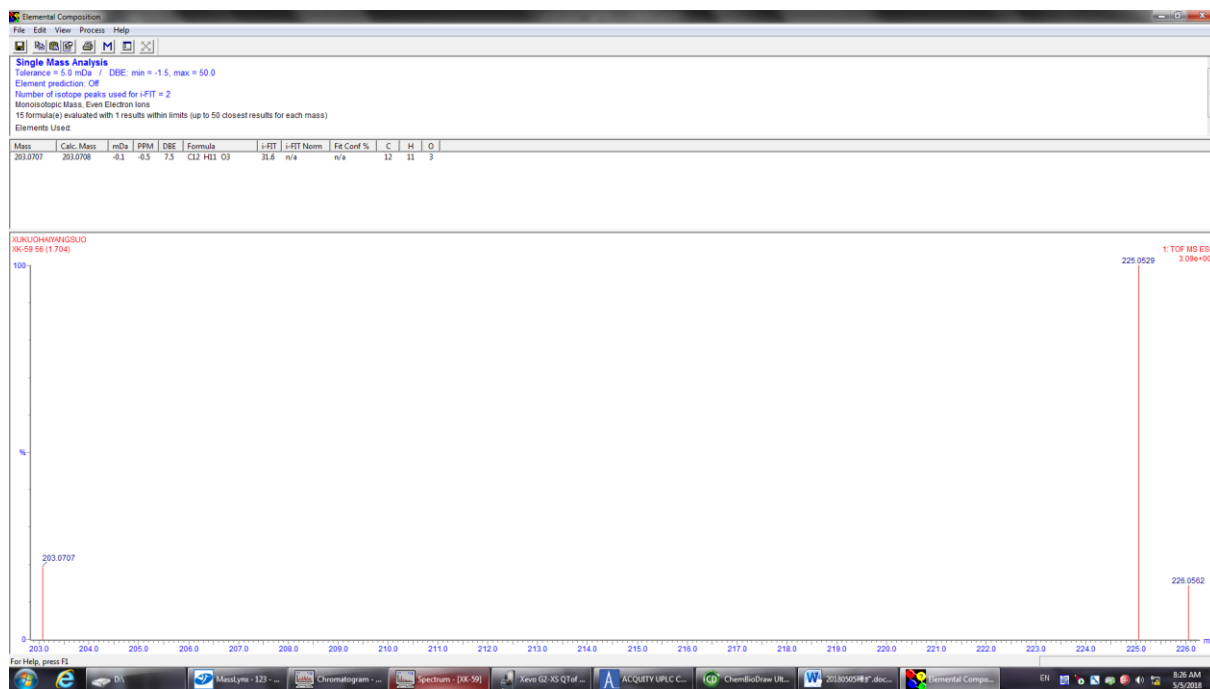

Figure S3. The HR-ESI-MS data of **1**

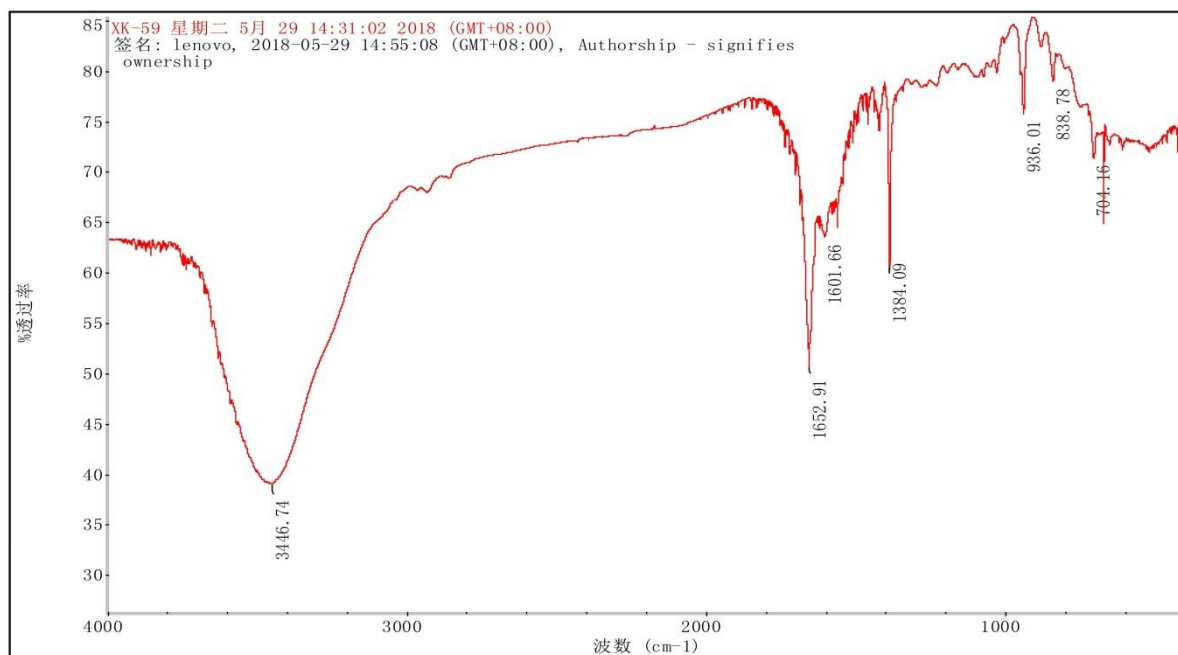

Figure S4. The IR spectrum (KBr) of **1**

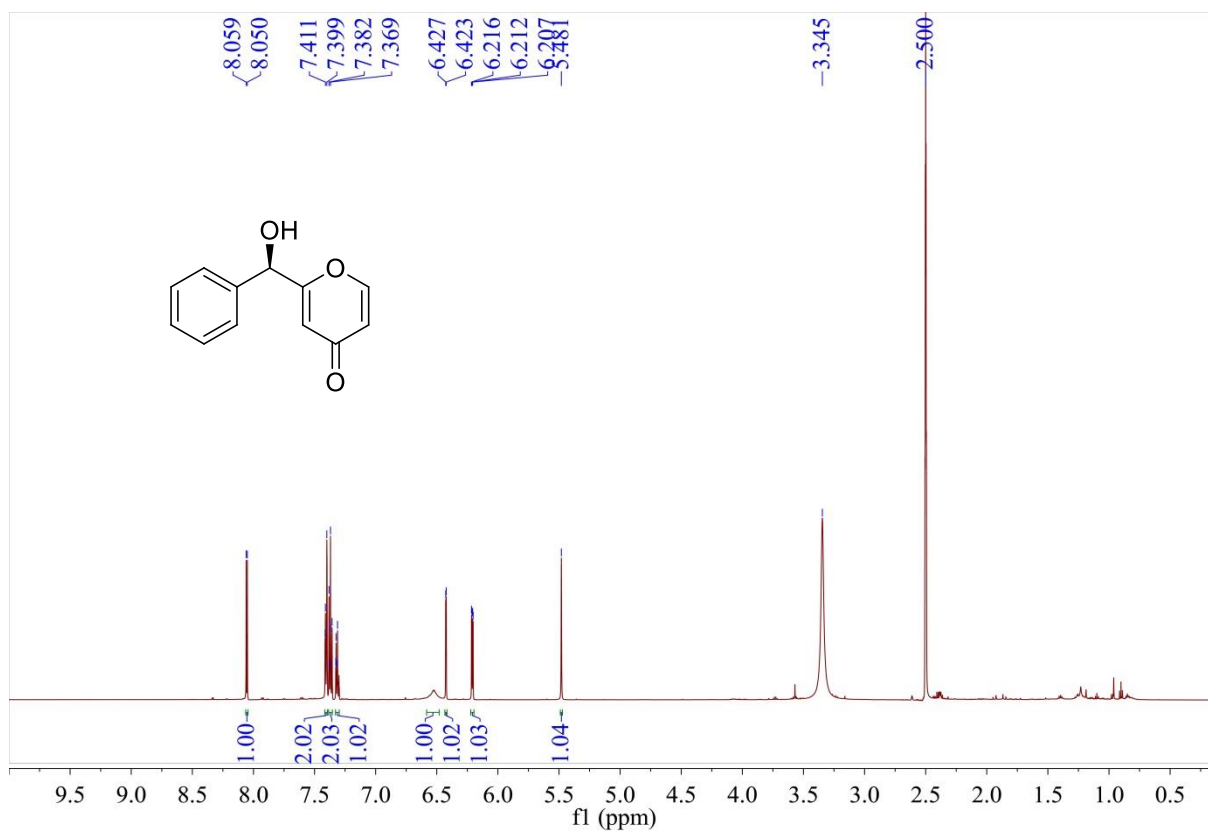

Figure S5. The  $^1\text{H}$  NMR spectrum (600 MHz) of **1** in  $\text{DMSO-}d_6$

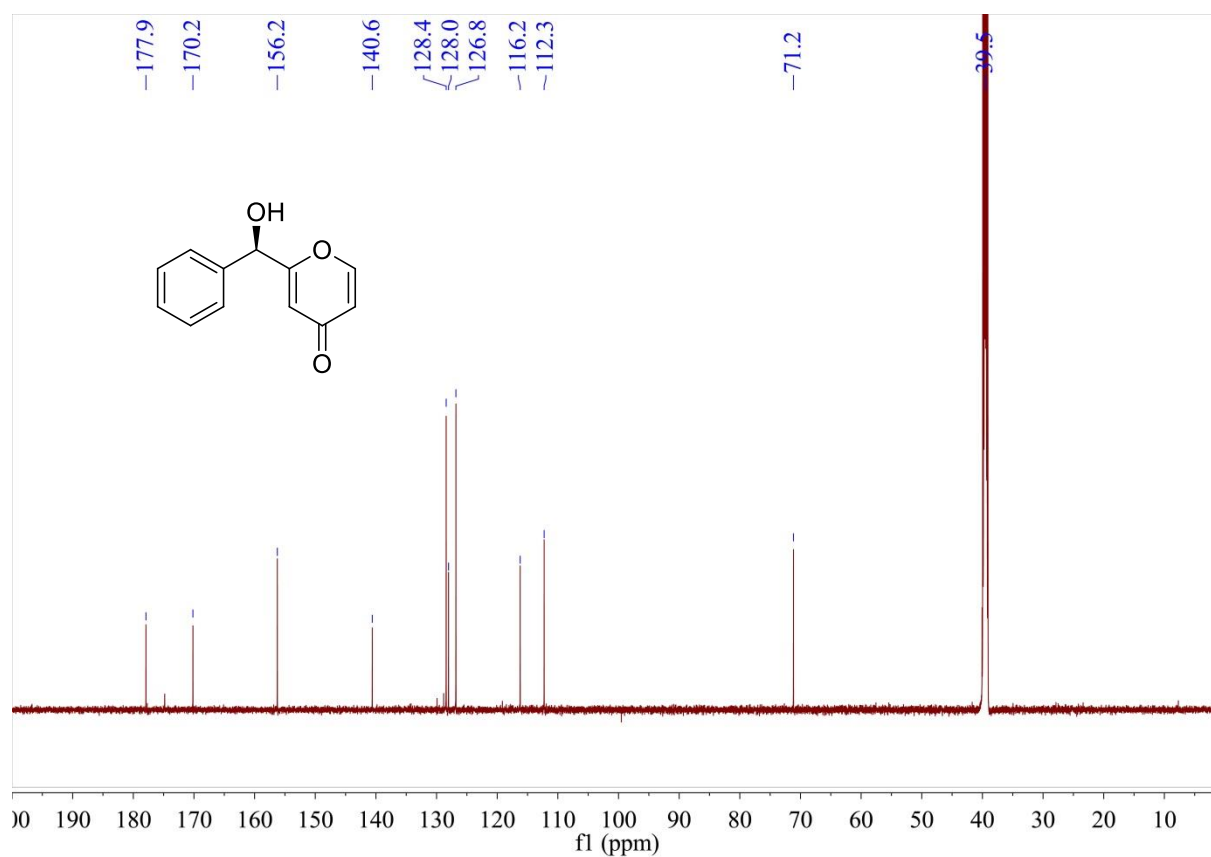

Figure S6. The  $^{13}\text{C}$  NMR spectrum (150 MHz) of **1** in  $\text{DMSO-}d_6$

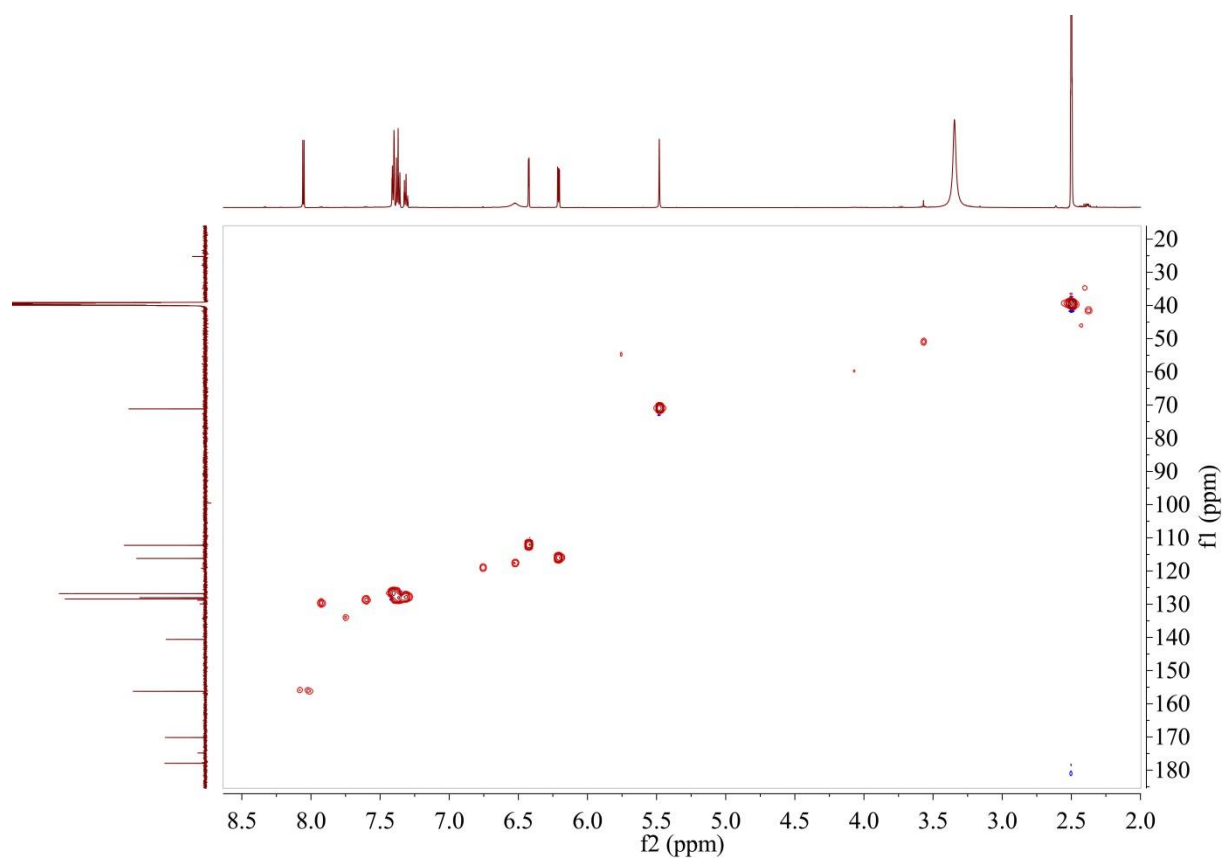

**Figure S7.** The HSQC spectrum (600 MHz) of **1** in DMSO-*d*<sub>6</sub>

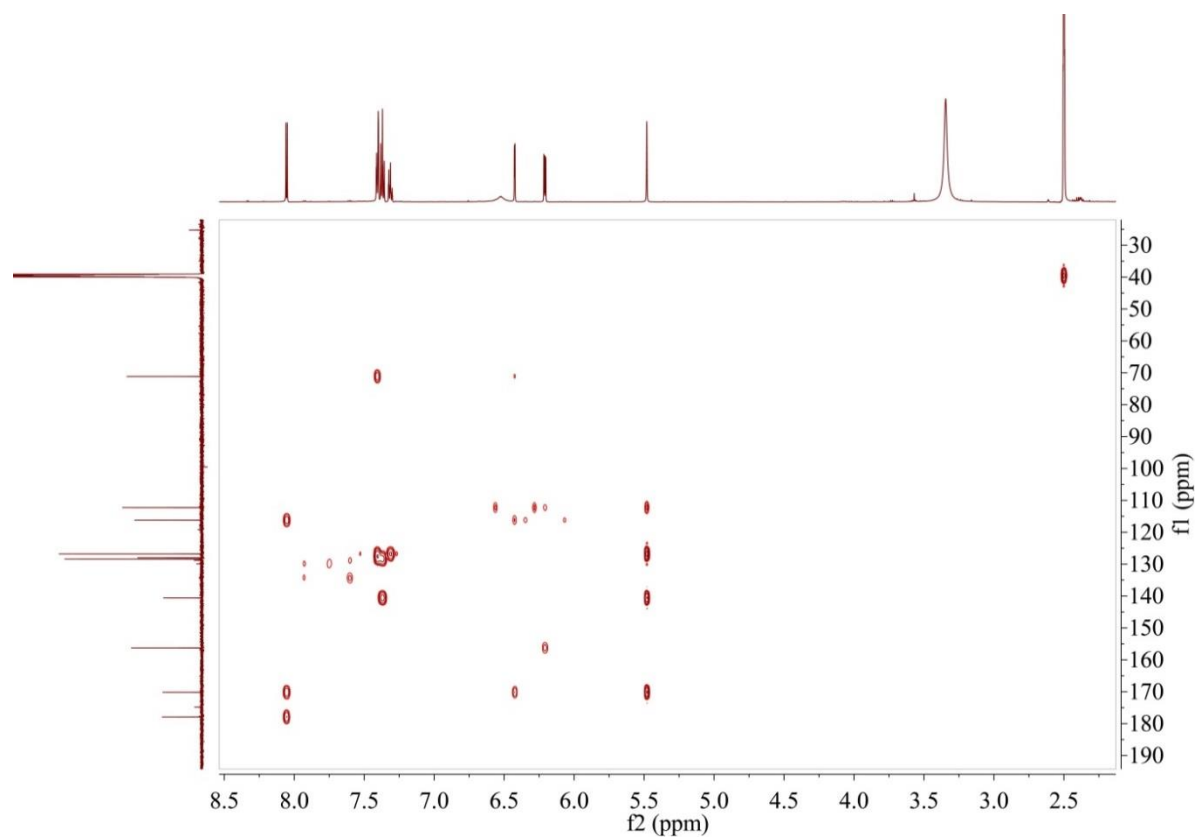

**Figure S8.** The HMBC spectrum (600 MHz) of **1** in DMSO-*d*<sub>6</sub>

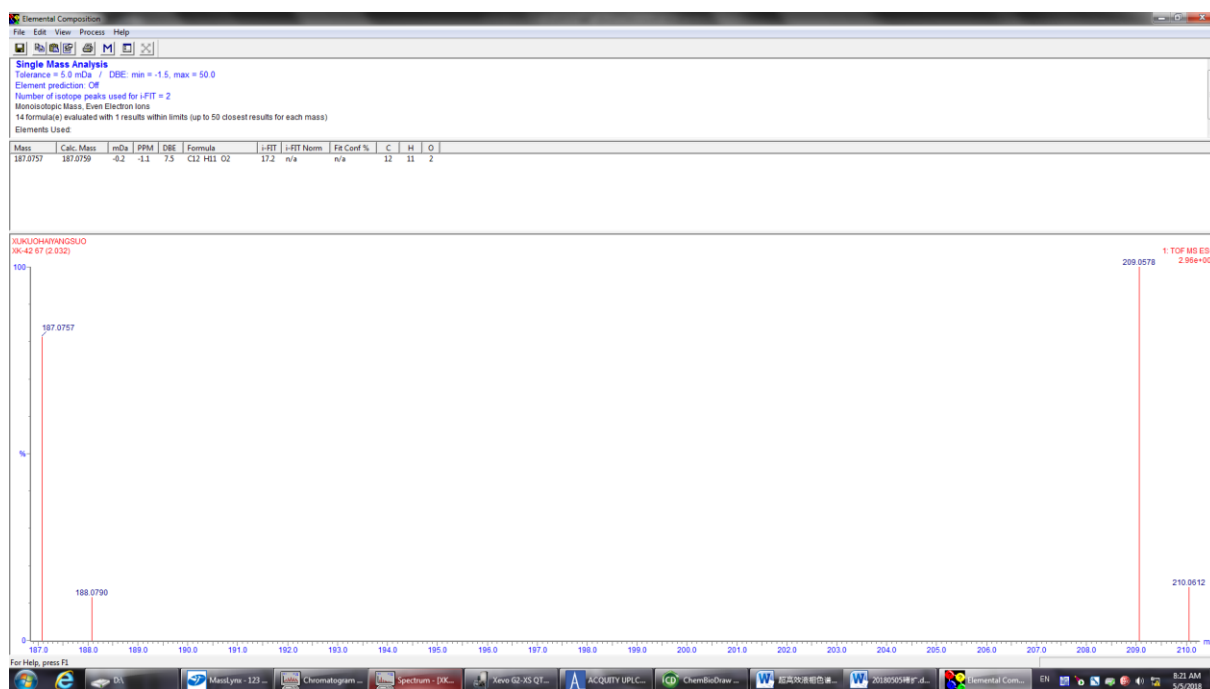

Figure S9. The HR-ESI-MS data of **2**

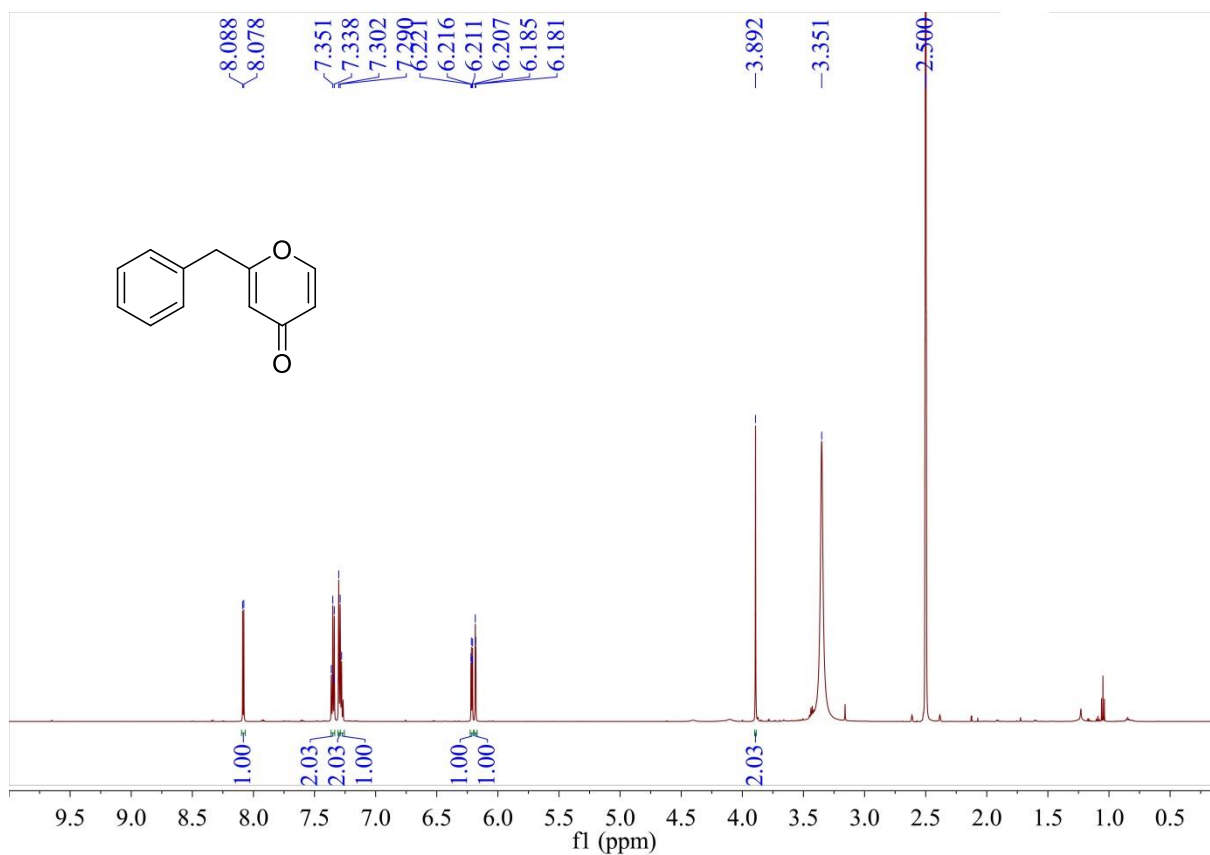

Figure S10. The  $^1\text{H}$  NMR spectrum (600 MHz) of **2** in  $\text{DMSO-}d_6$



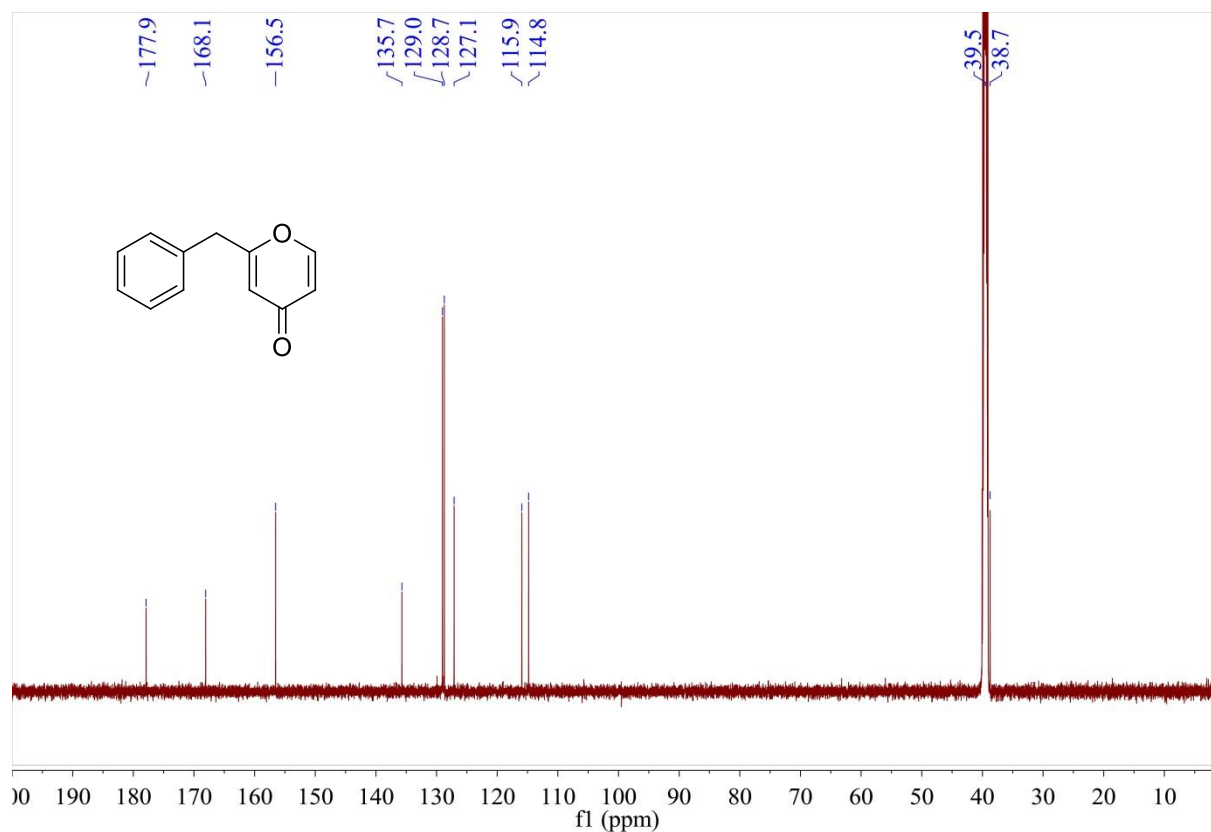

Figure S11. The  $^{13}\text{C}$  NMR spectrum (150 MHz) of **2** in  $\text{DMSO-}d_6$

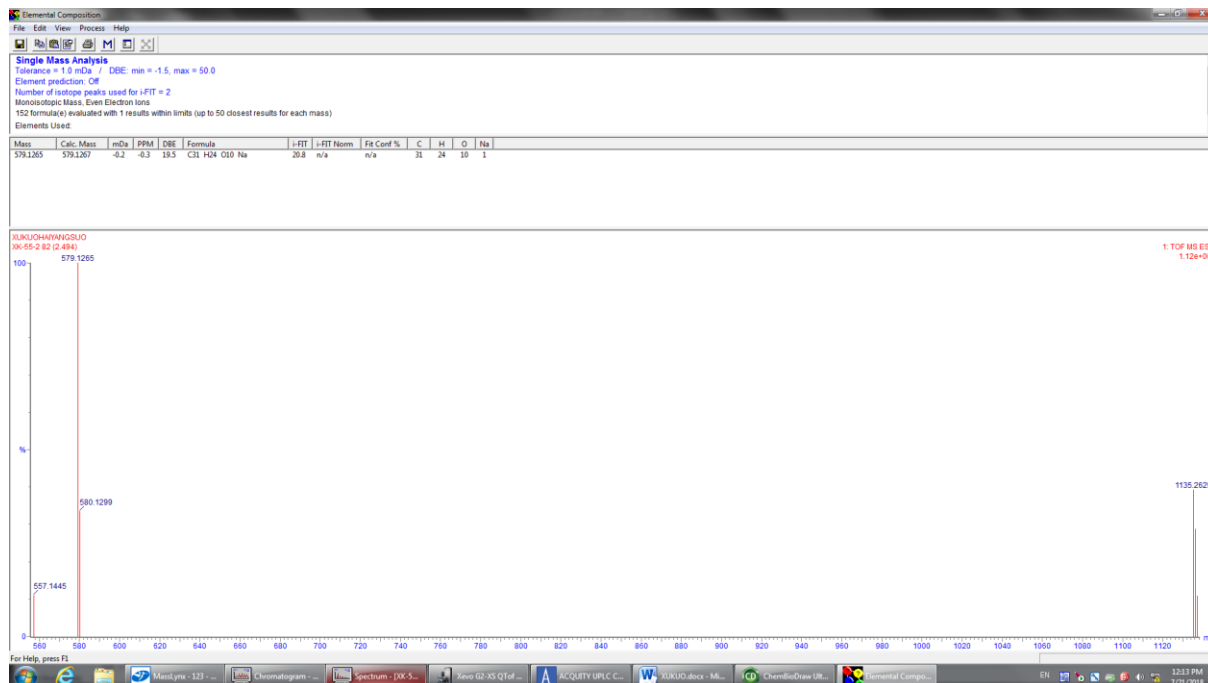

Figure S12. The HR-ESI-MS data of **3**

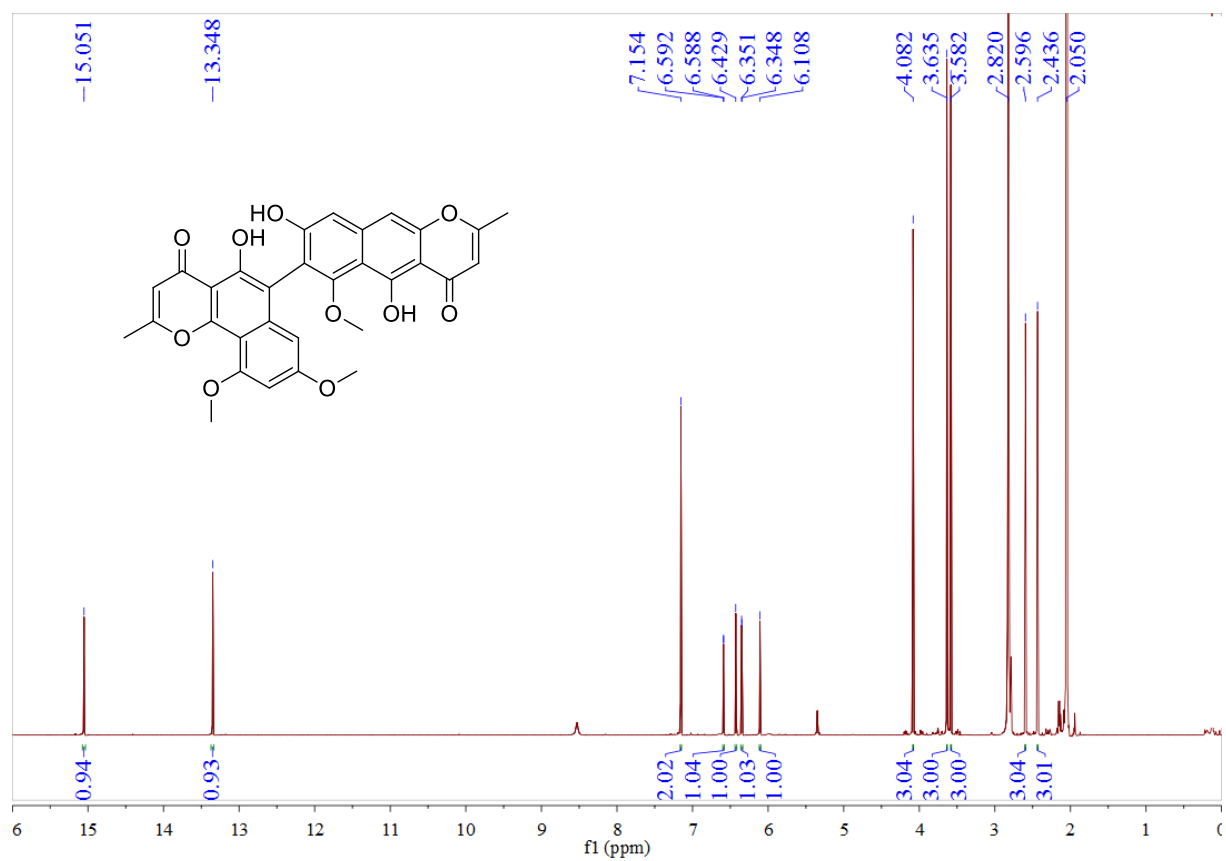

Figure S13. The  $^1\text{H}$  NMR spectrum (600 MHz) of **3** in acetone- $d_6$

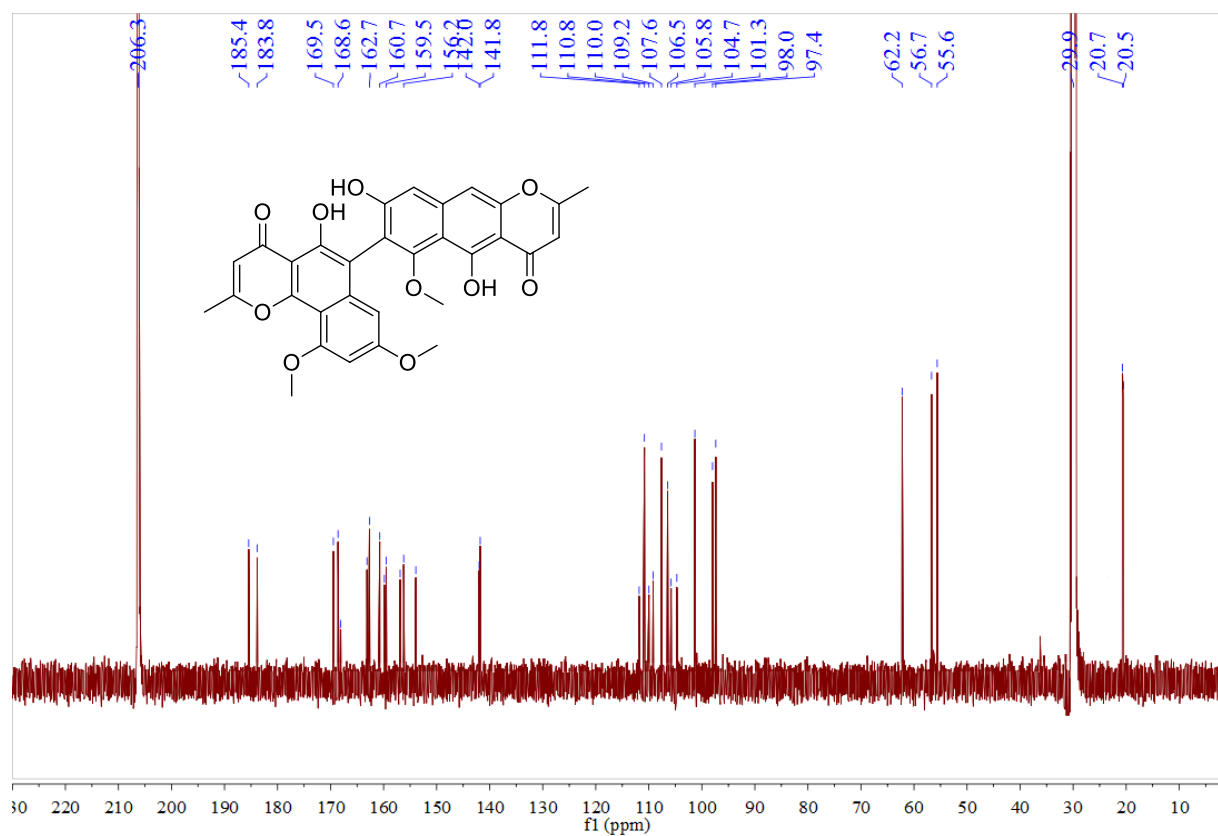

Figure S14. The  $^{13}\text{C}$  NMR spectrum (150 MHz) of **3** in acetone- $d_6$

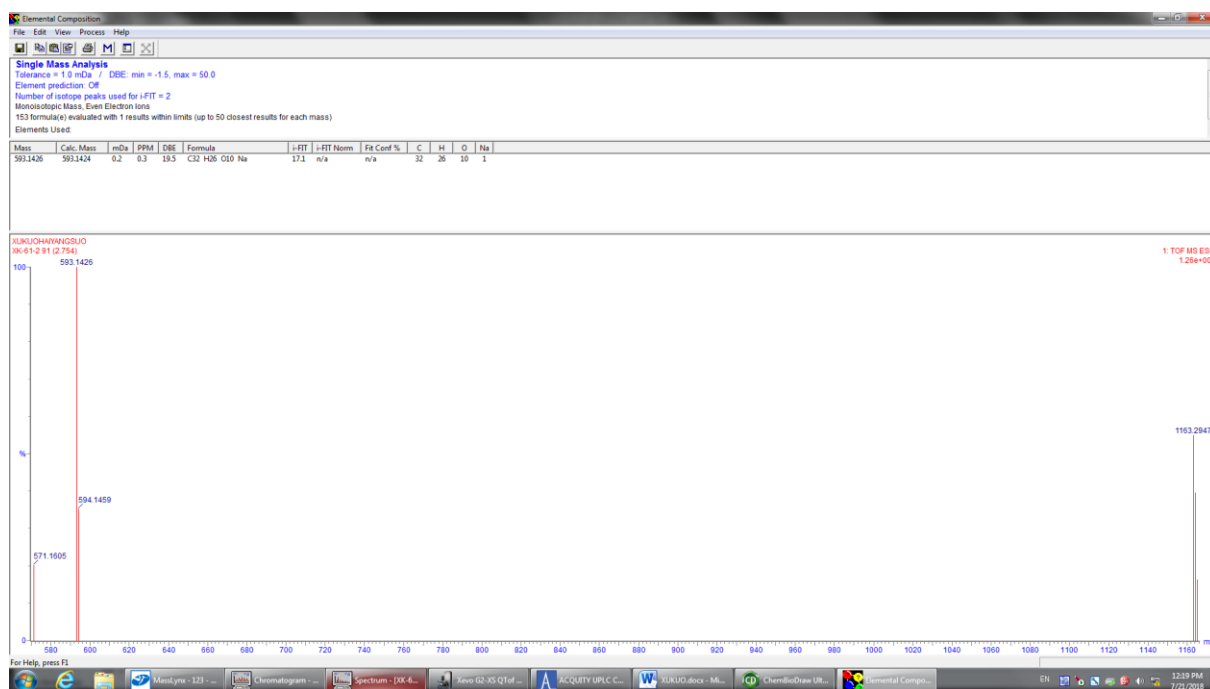

Figure S15. The HR-ESI-MS data of 4

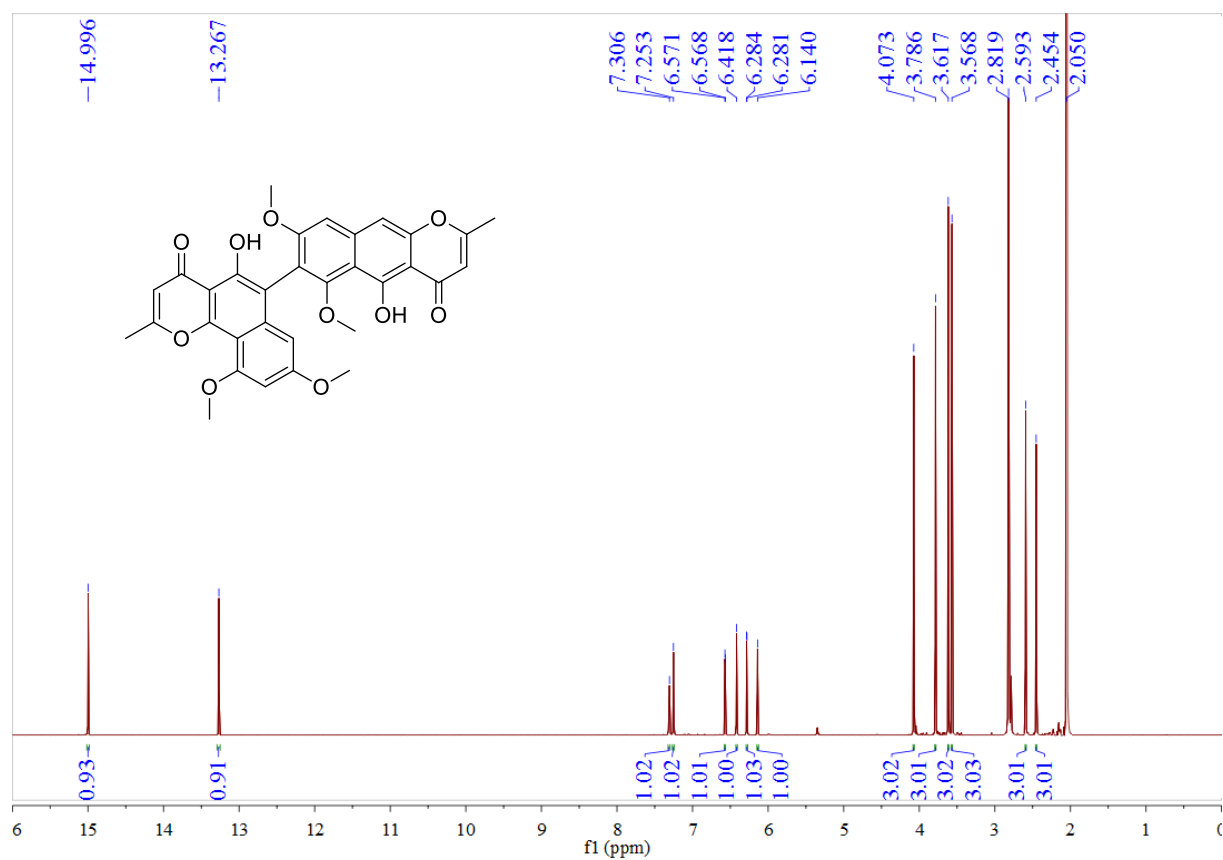

Figure S16. The <sup>1</sup>H NMR spectrum (600 MHz) of 4 in acetone-*d*<sub>6</sub>

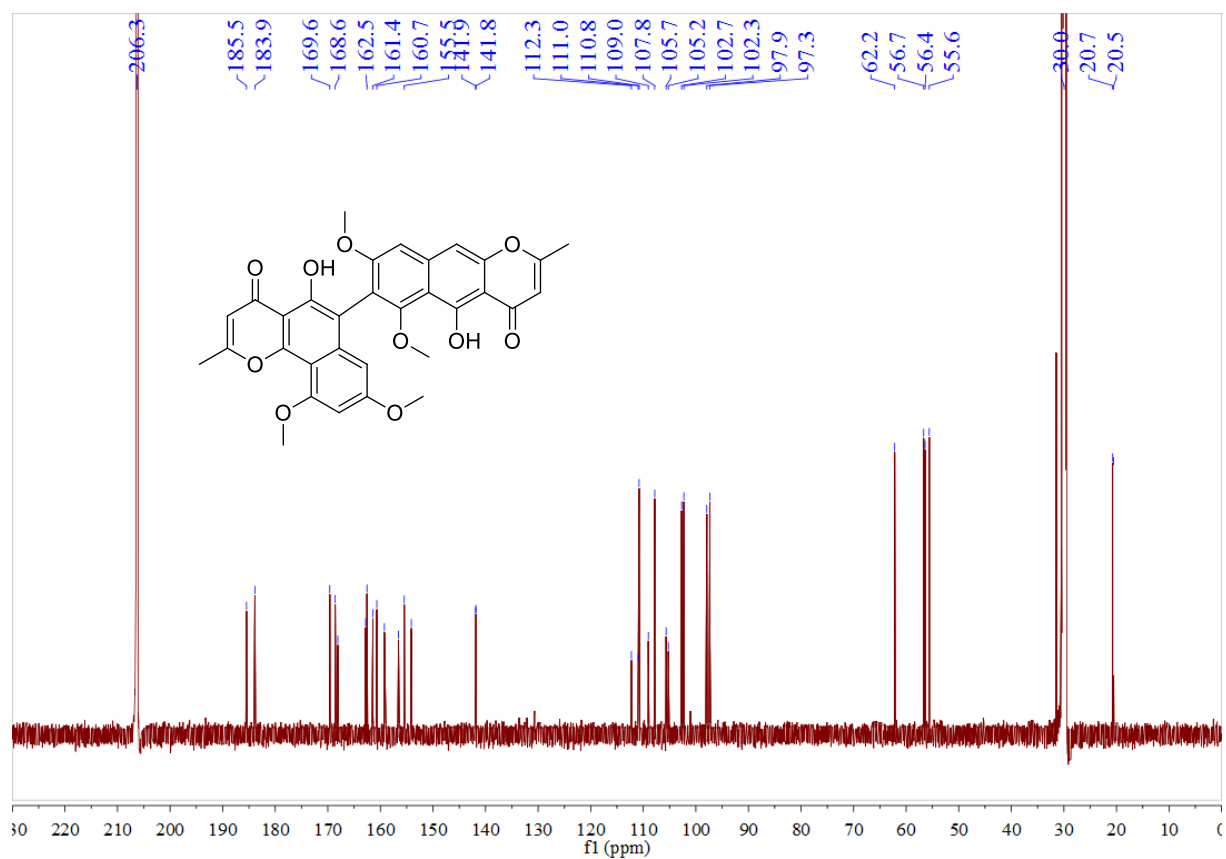

Figure S17. The  $^{13}\text{C}$  NMR spectrum (150 MHz) of **4** in acetone- $d_6$

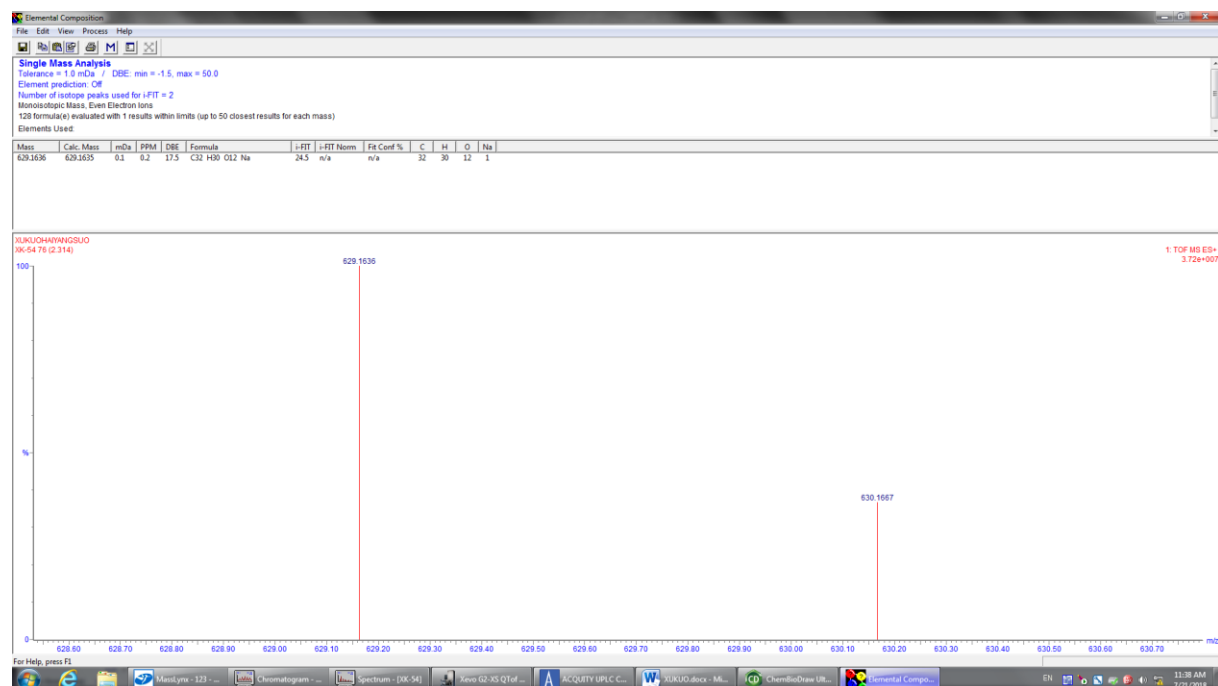

Figure S18. The HR-ESI-MS data of **5**

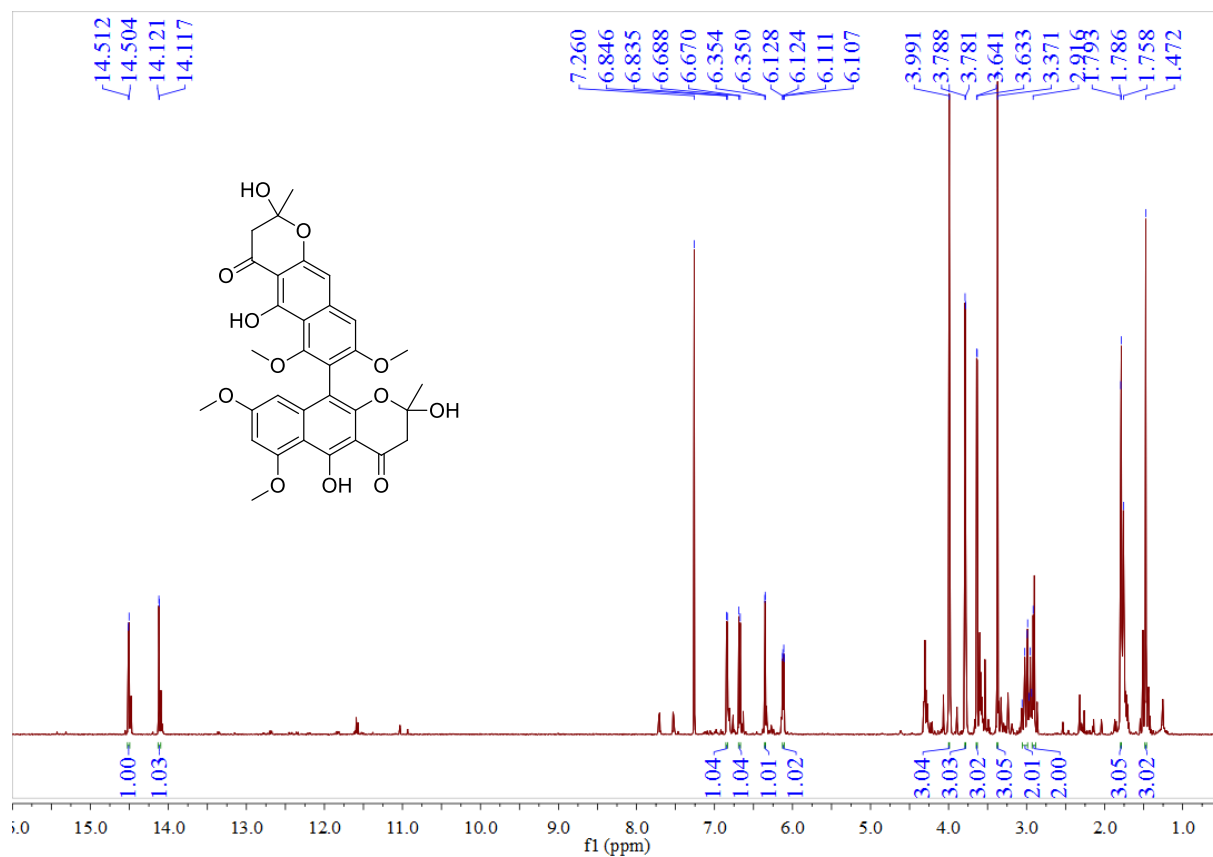

Figure S19. The <sup>1</sup>H NMR spectrum (600 MHz) of 5 in CDCl<sub>3</sub>

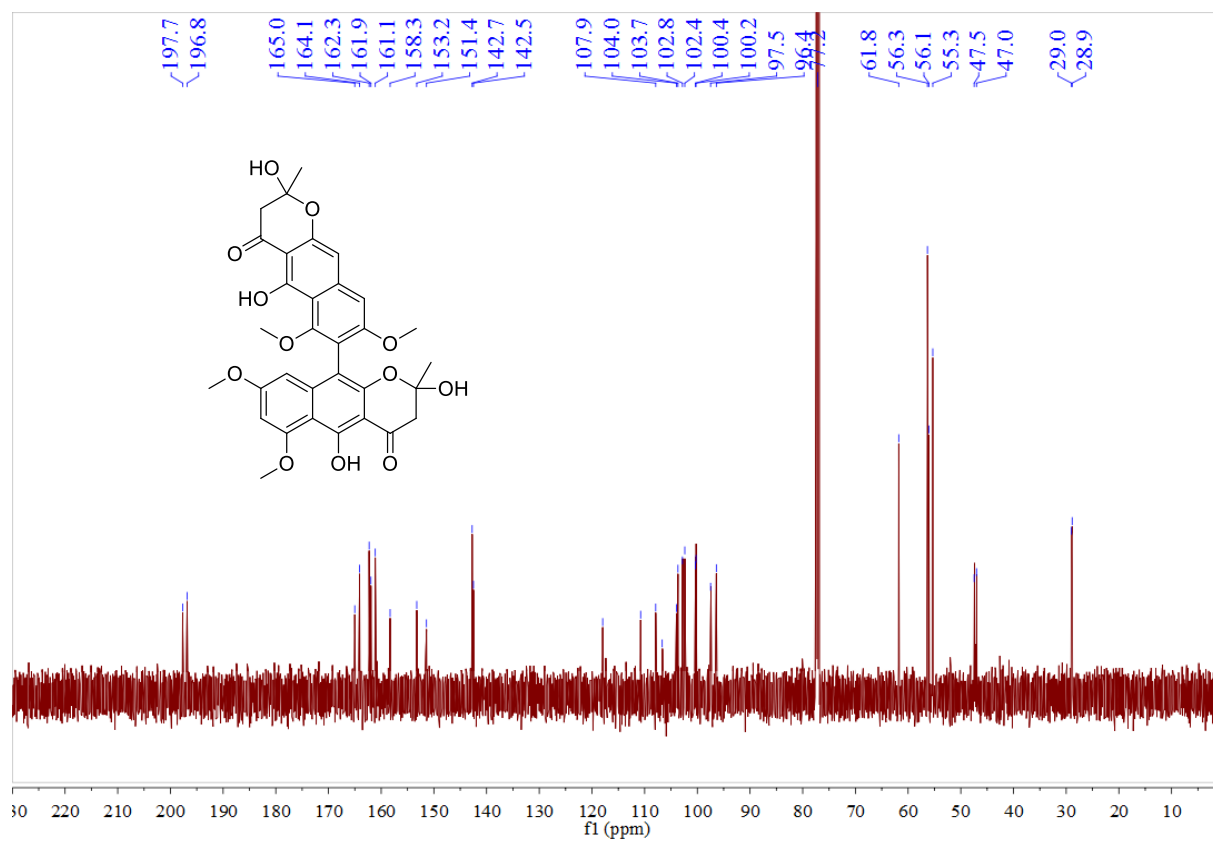

Figure S20. The <sup>13</sup>C NMR spectrum (150 MHz) of 5 in CDCl<sub>3</sub>

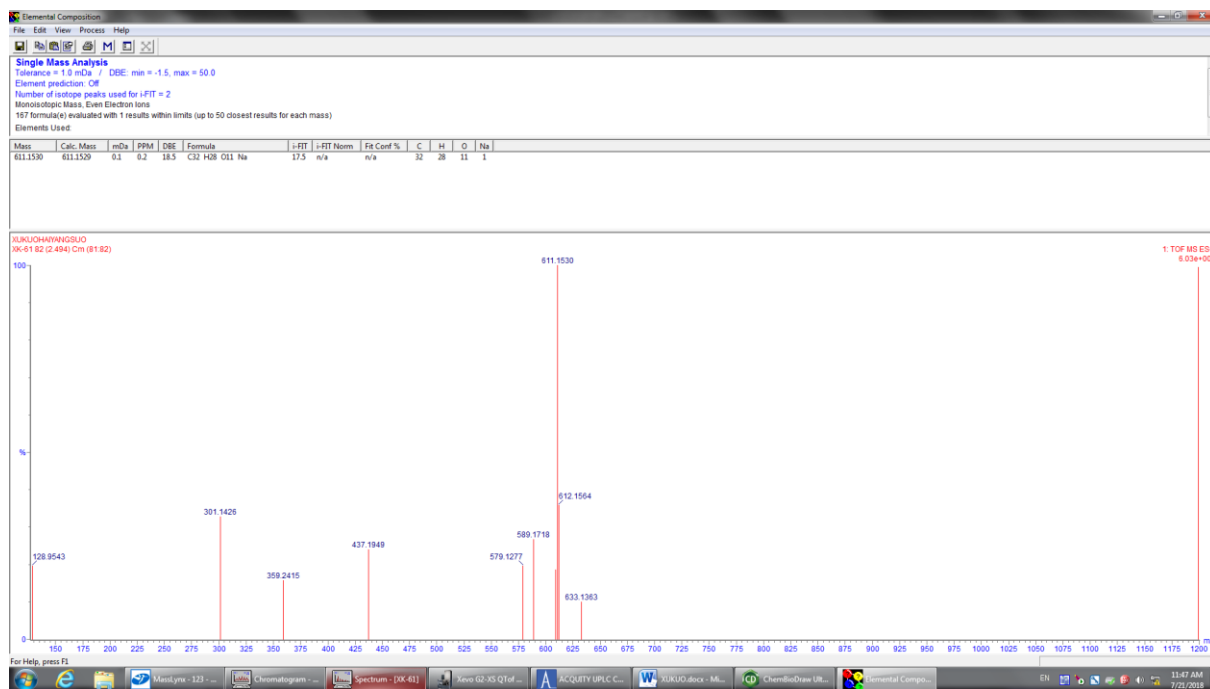

Figure S21. The HR-ESI-MS data of **6**

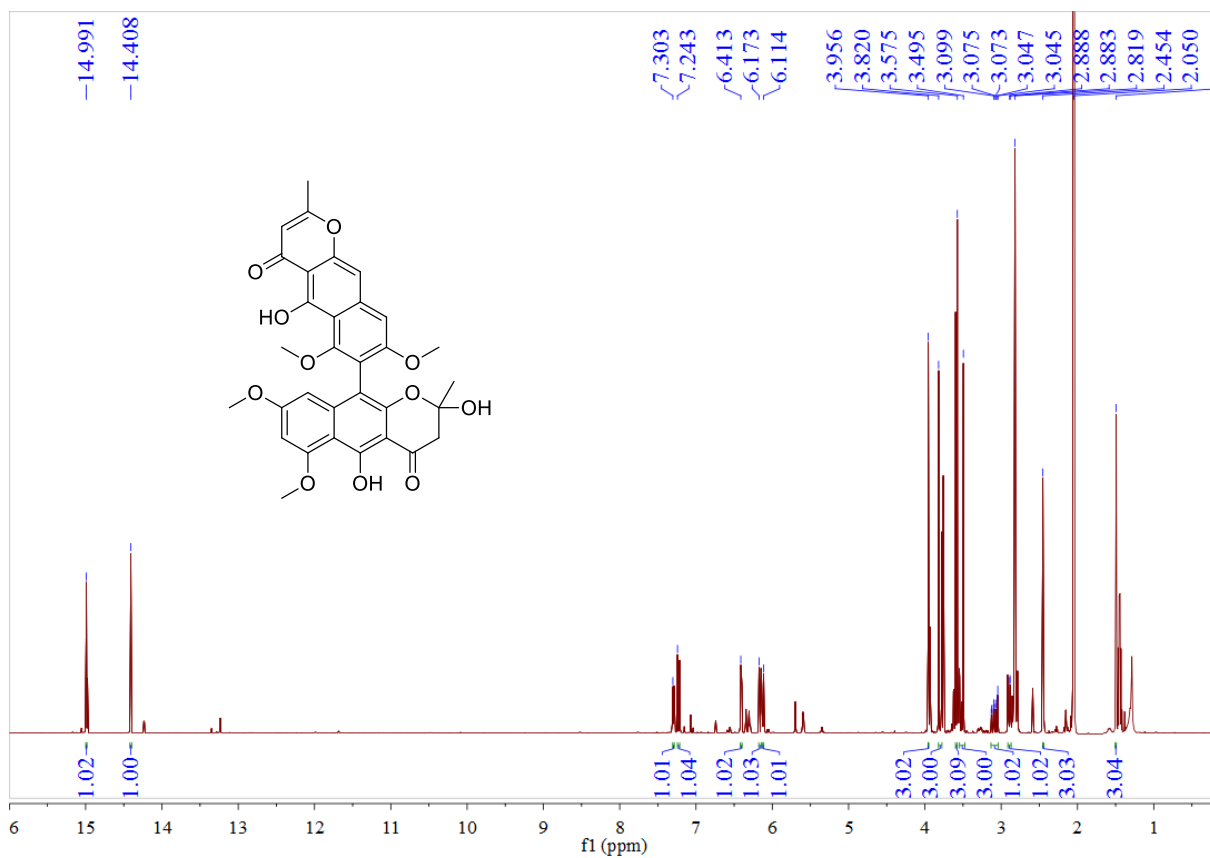

Figure S22. The <sup>1</sup>H NMR spectrum (600 MHz) of **6** in acetone-*d*<sub>6</sub>

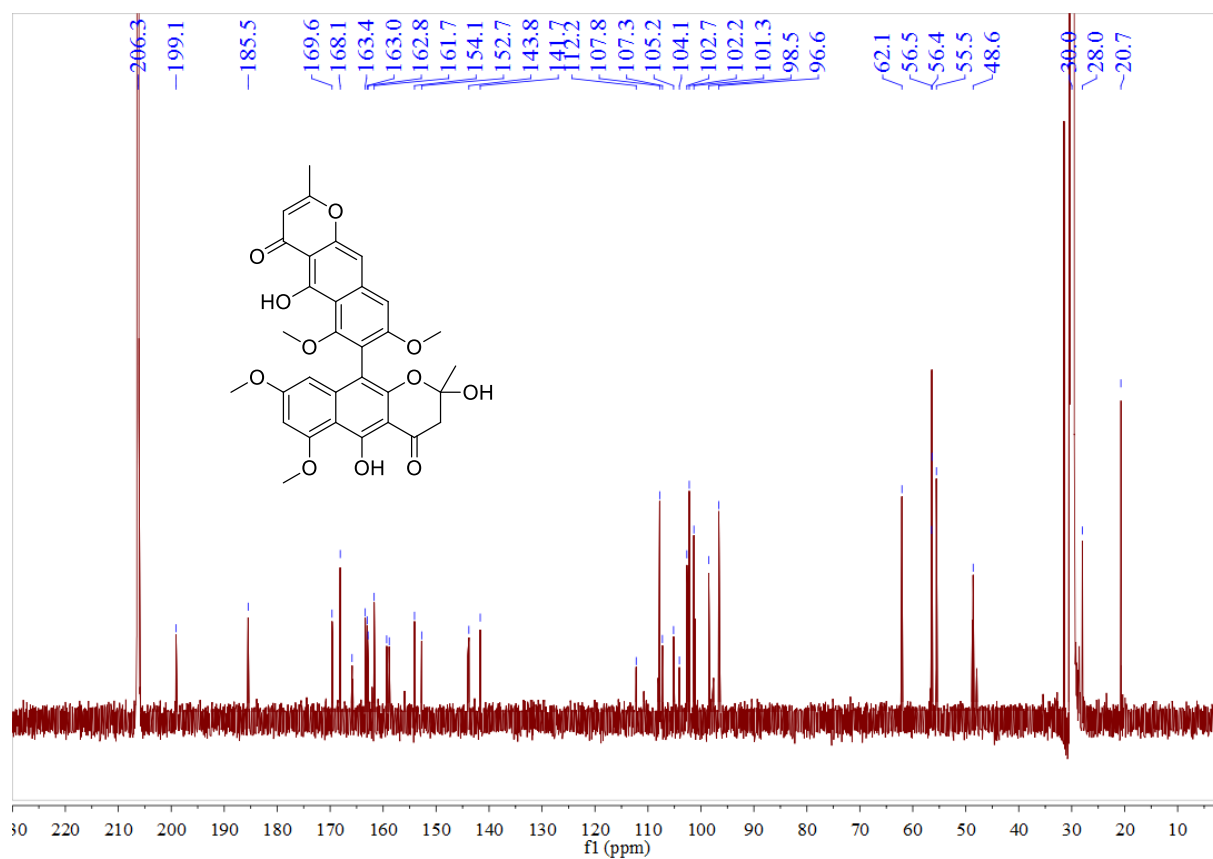

Figure S23. The  $^{13}\text{C}$  NMR spectrum (150 MHz) of **6** in acetone- $d_6$

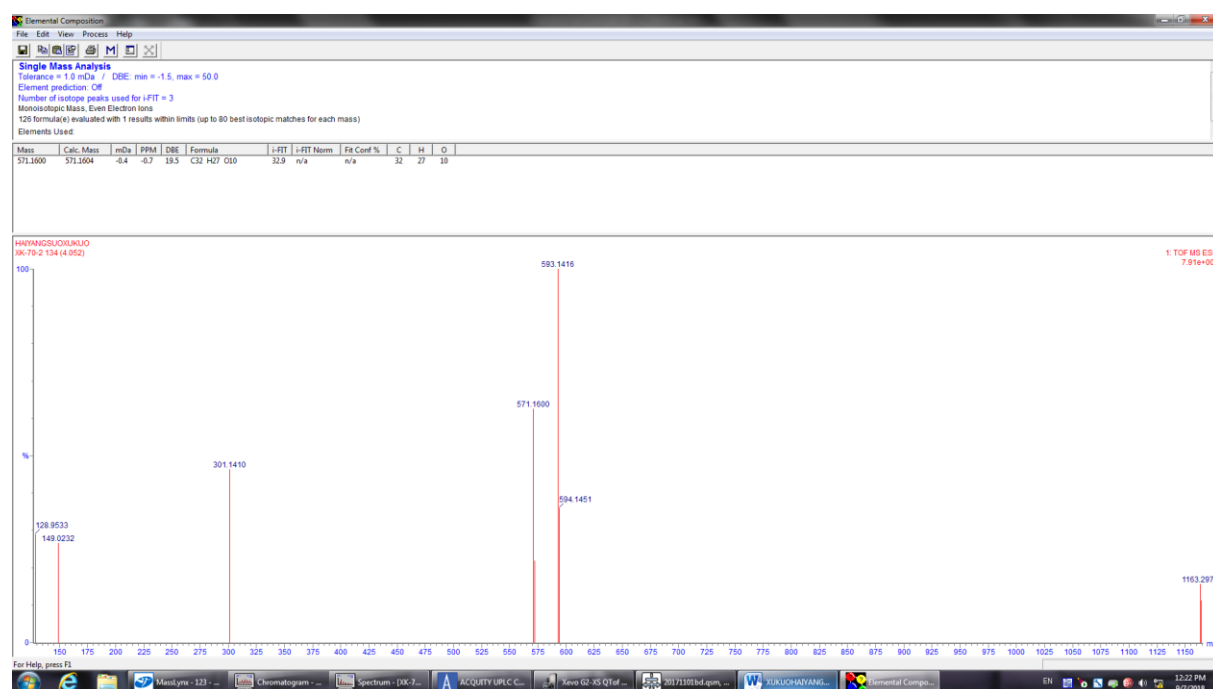

Figure S24. The HR-ESI-MS data of **7**

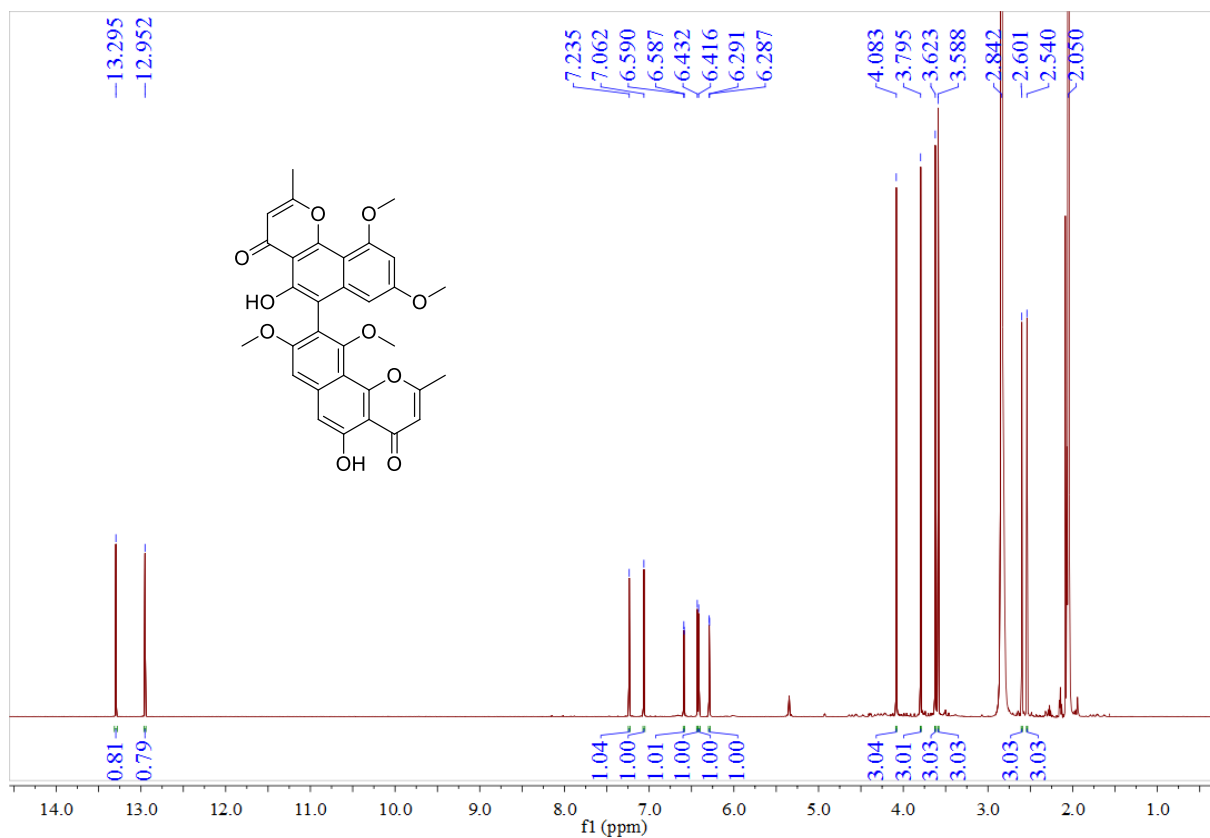

Figure S25. The  $^1\text{H}$  NMR spectrum (600 MHz) of **7** in acetone- $d_6$

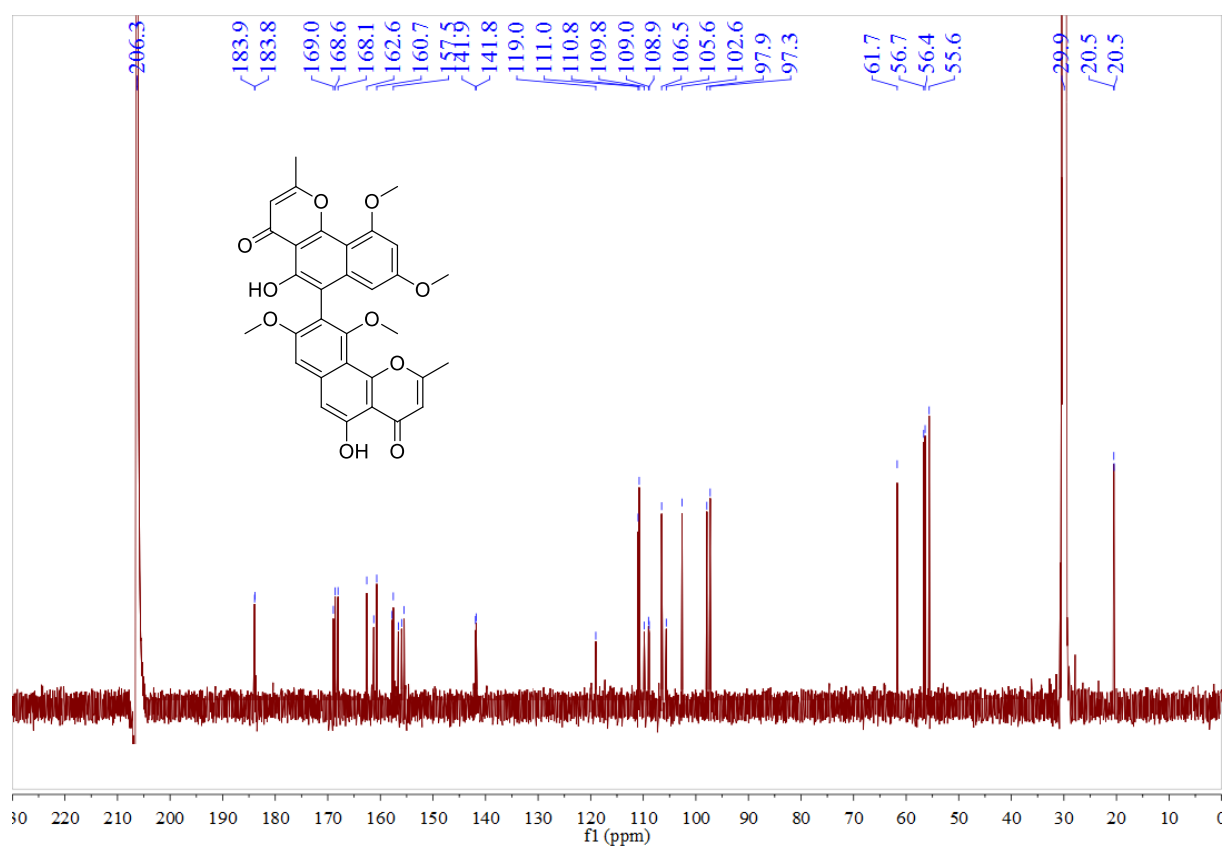

Figure S26. The  $^{13}\text{C}$  NMR spectrum (150 MHz) of **7** in acetone- $d_6$



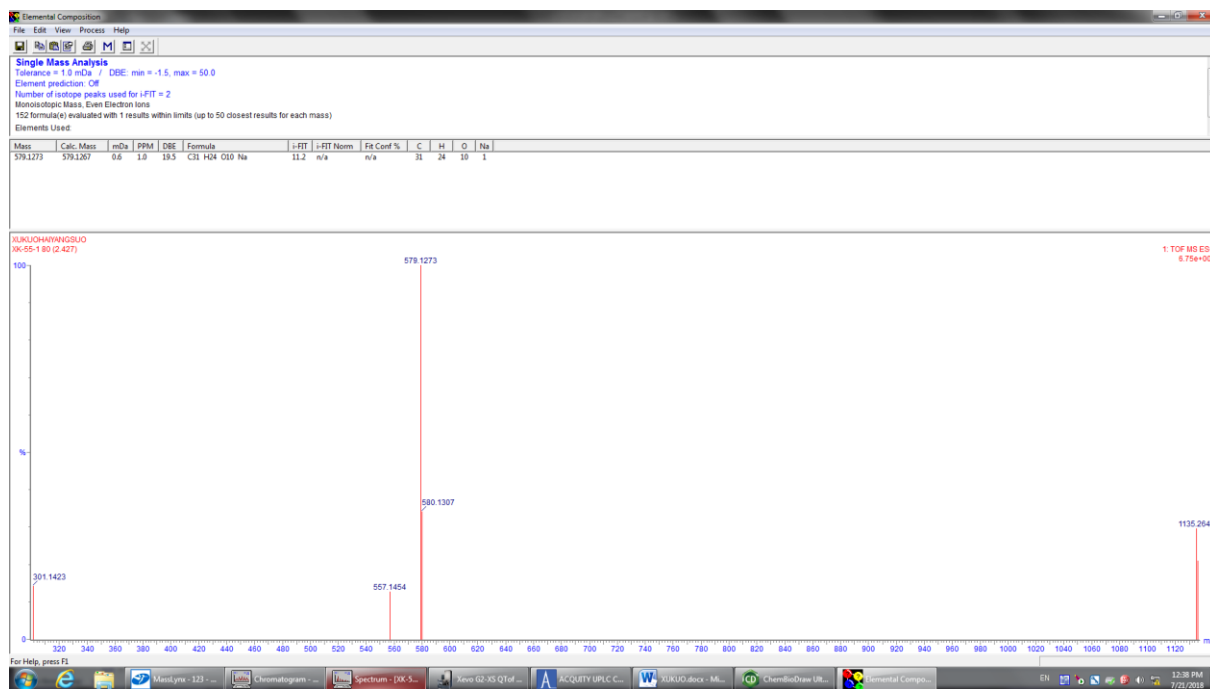

Figure S27. The HR-ESI-MS data of **8**

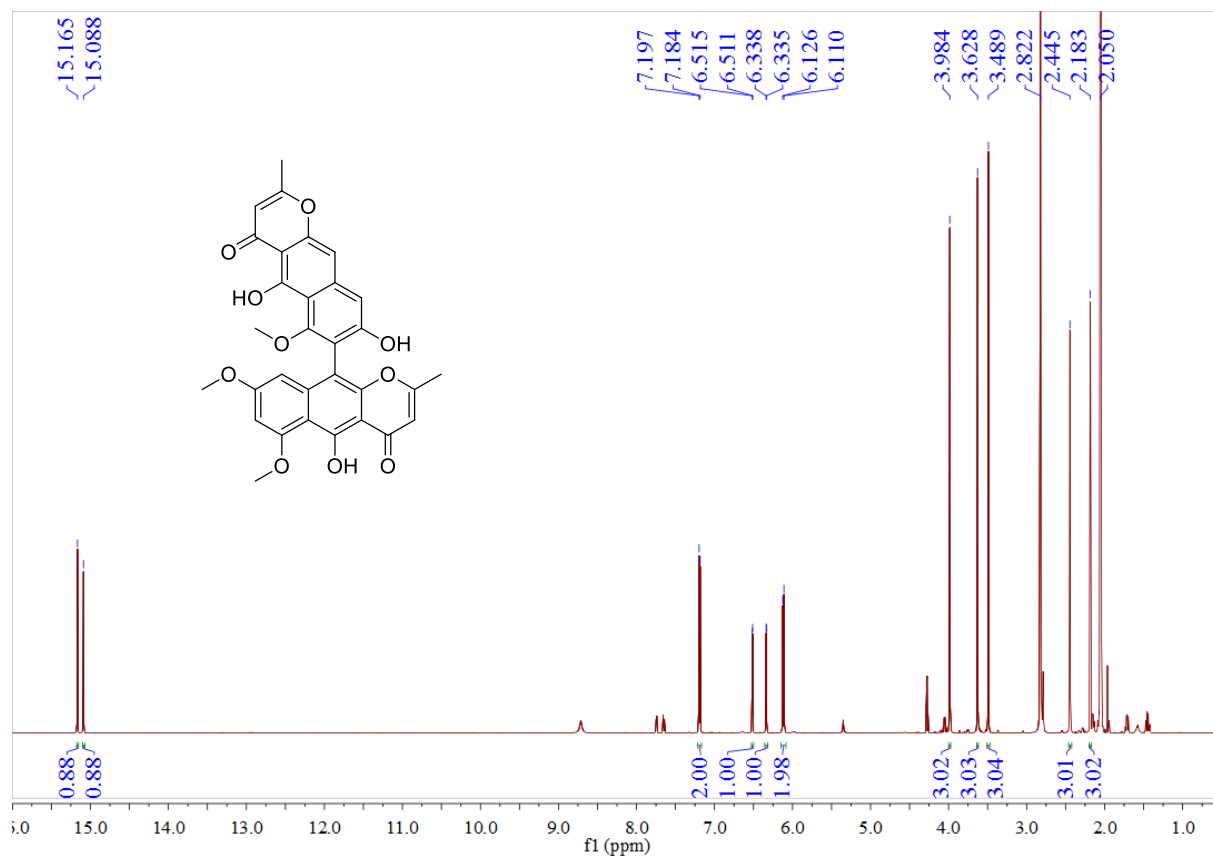

Figure S28. The <sup>1</sup>H NMR spectrum (600 MHz) of **8** in acetone-*d*<sub>6</sub>

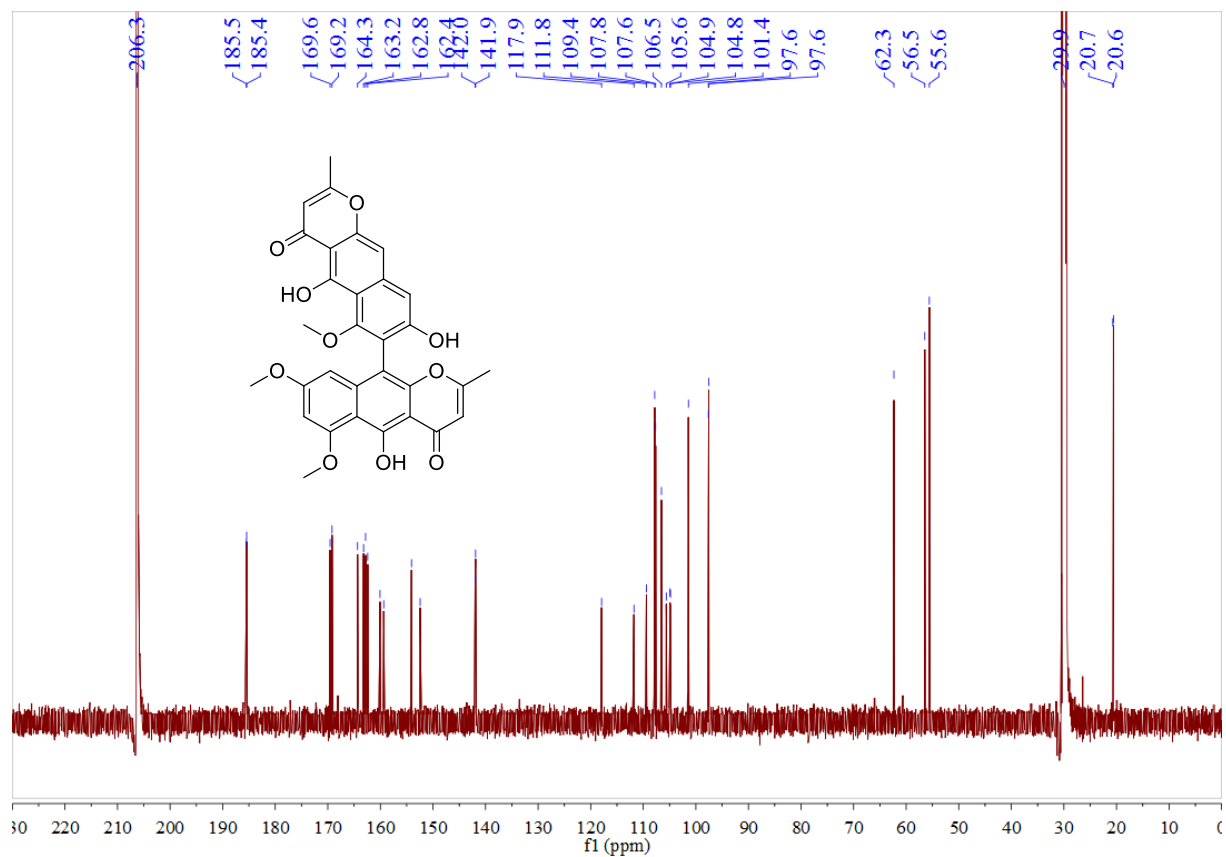

Figure S29. The  $^{13}\text{C}$  NMR spectrum (150 MHz) of **8** in acetone- $d_6$

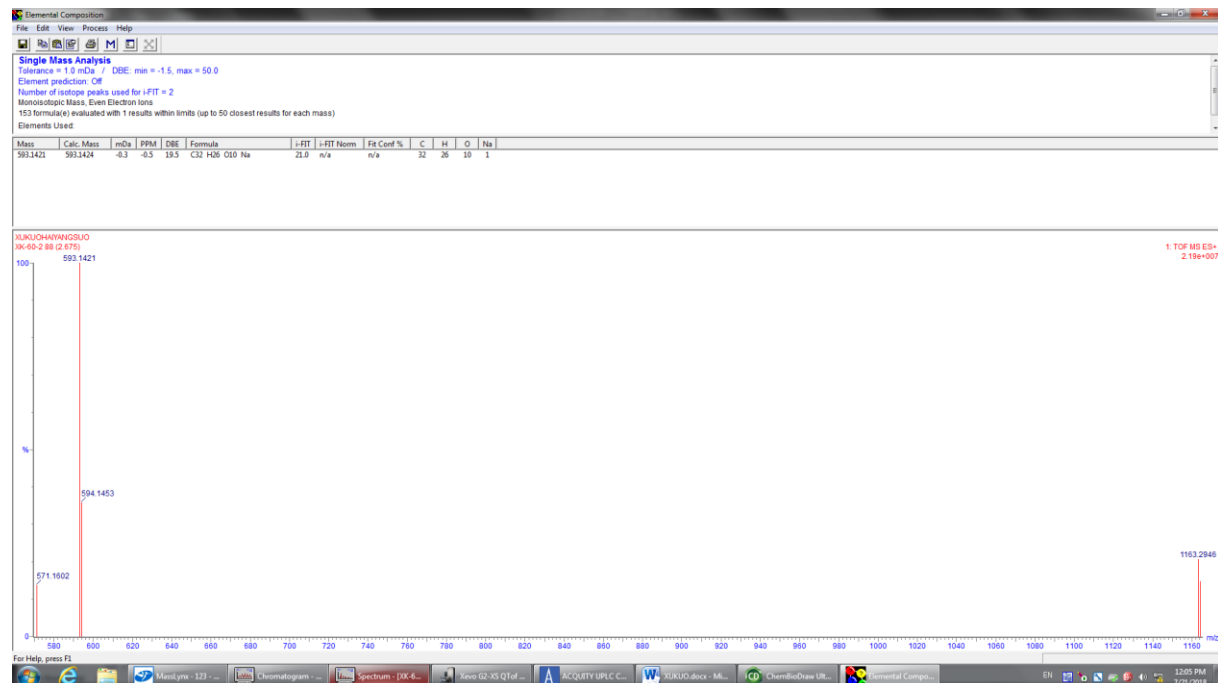

Figure S30. The HR-ESI-MS data of **9**

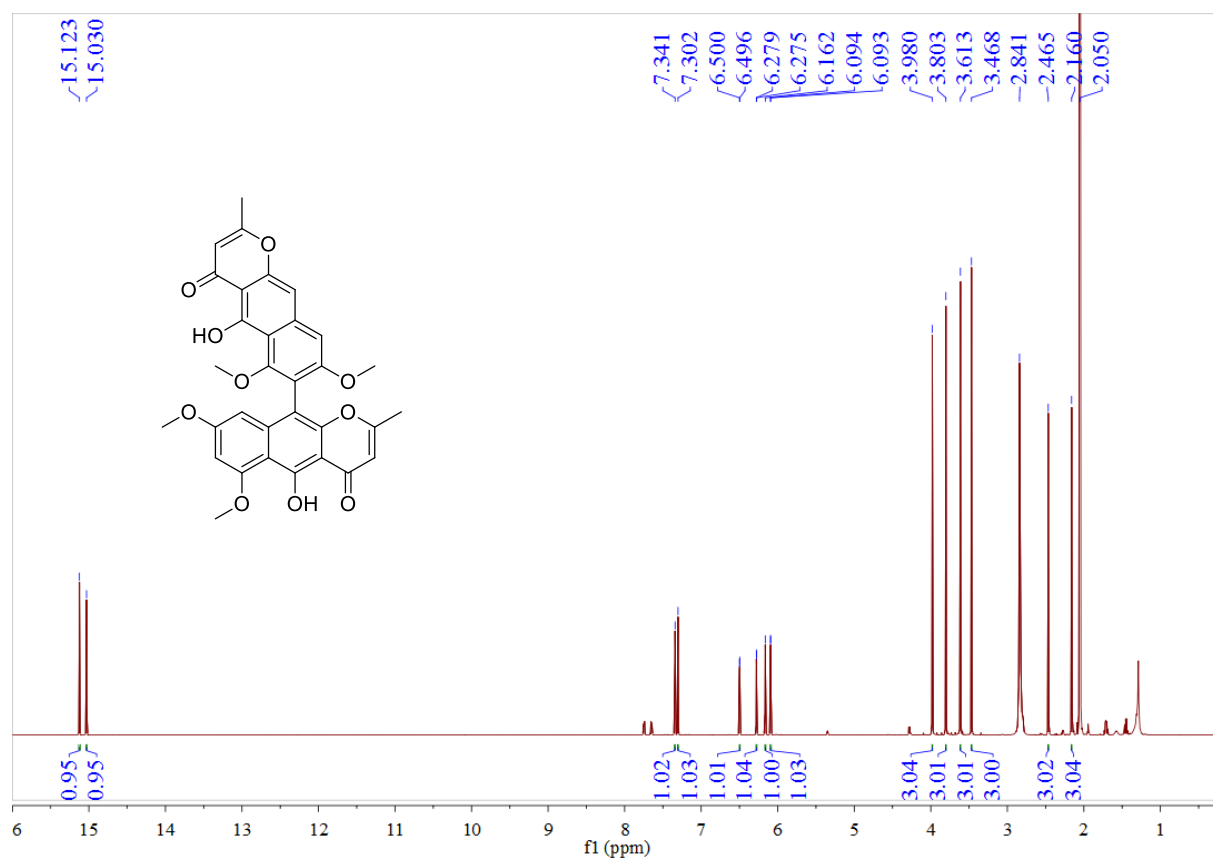

**Figure S31.** The <sup>1</sup>H NMR spectrum (600 MHz) of **9** in acetone-*d*<sub>6</sub>

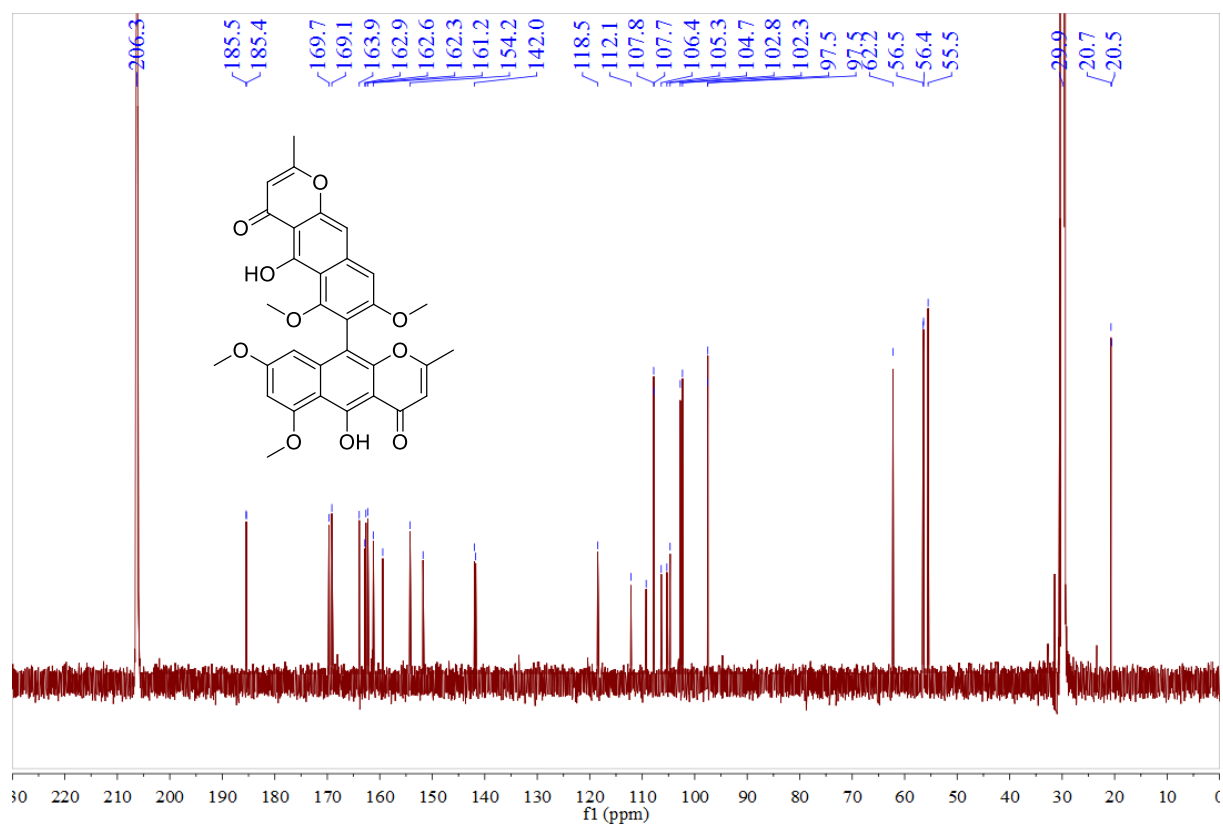

**Figure S32.** The <sup>13</sup>C NMR spectrum (150 MHz) of **9** in acetone-*d*<sub>6</sub>

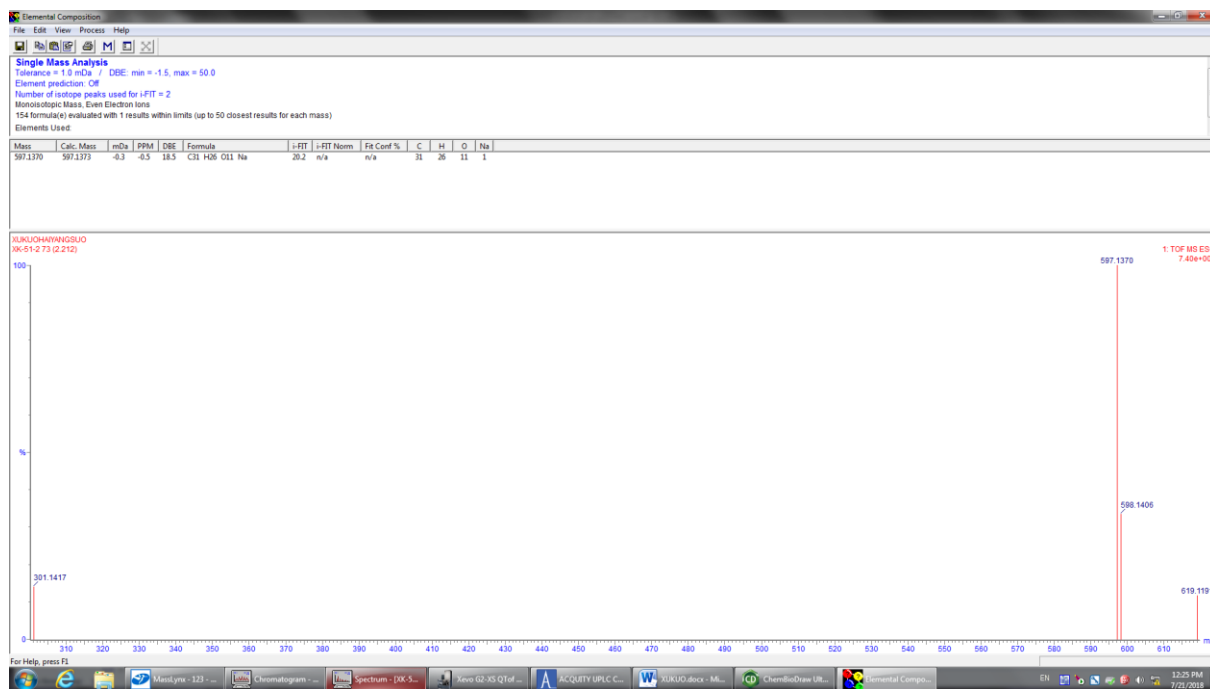

Figure S33. The HR-ESI-MS data of **10**

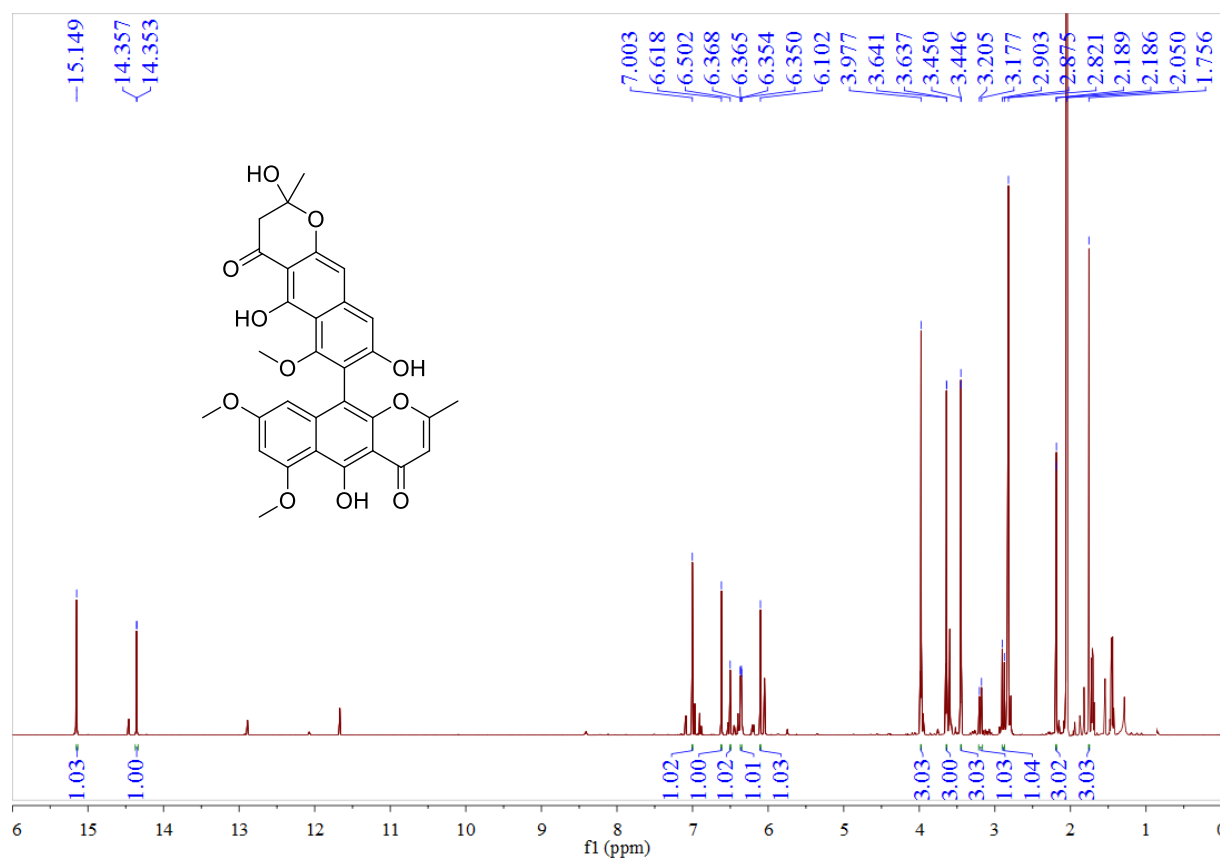

Figure S34. The <sup>1</sup>H NMR spectrum (600 MHz) of **10** in acetone-*d*<sub>6</sub>

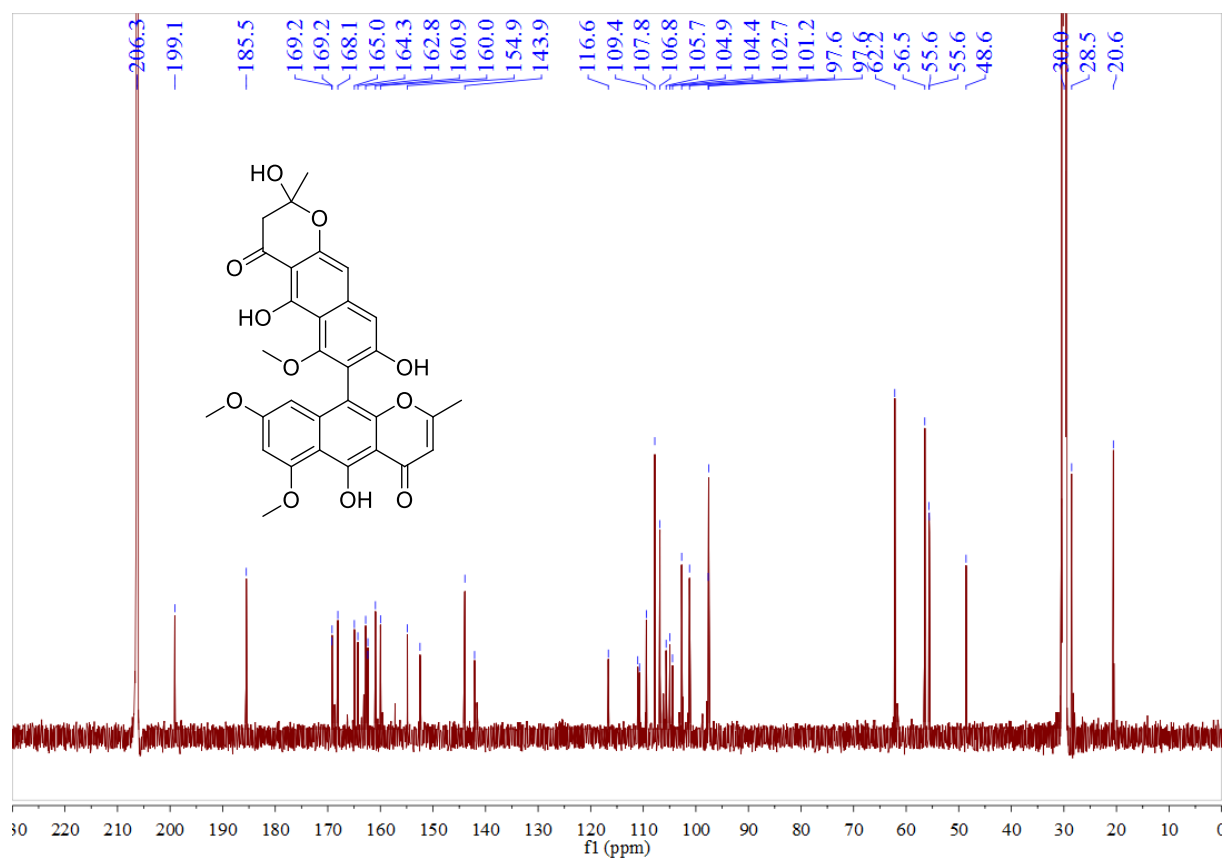

Figure S35. The  $^{13}\text{C}$  NMR spectrum (150 MHz) of **10** in acetone- $d_6$

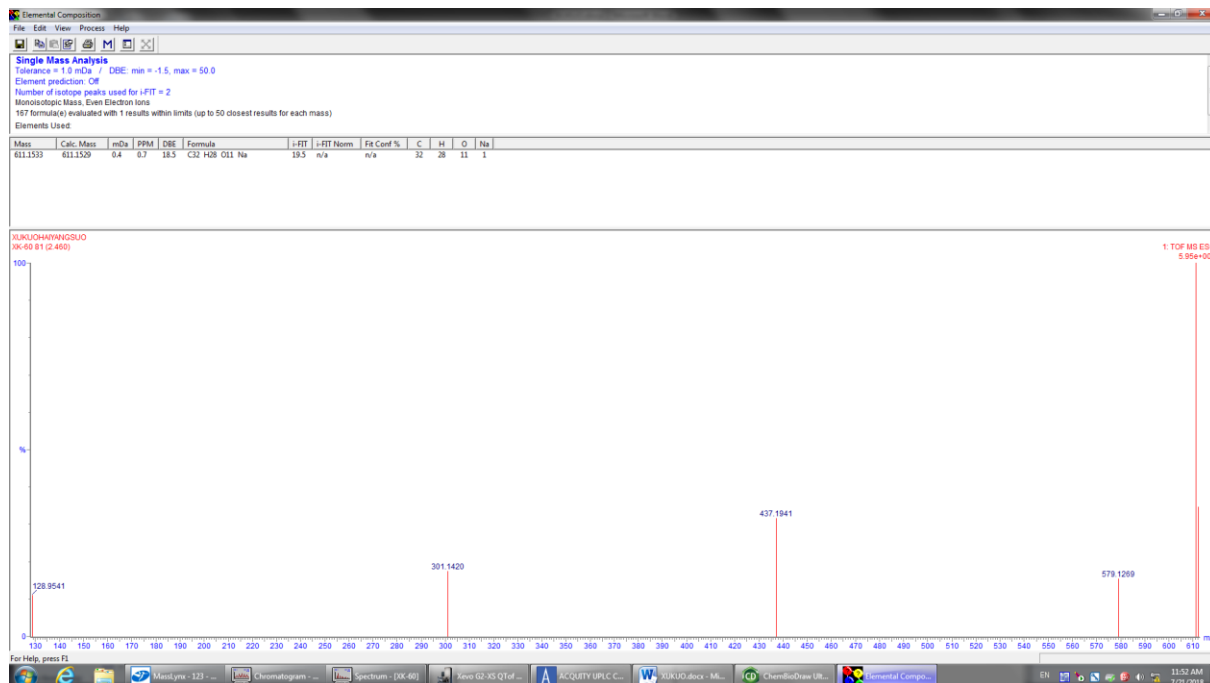

Figure S36. The HR-ESI-MS data of **11**

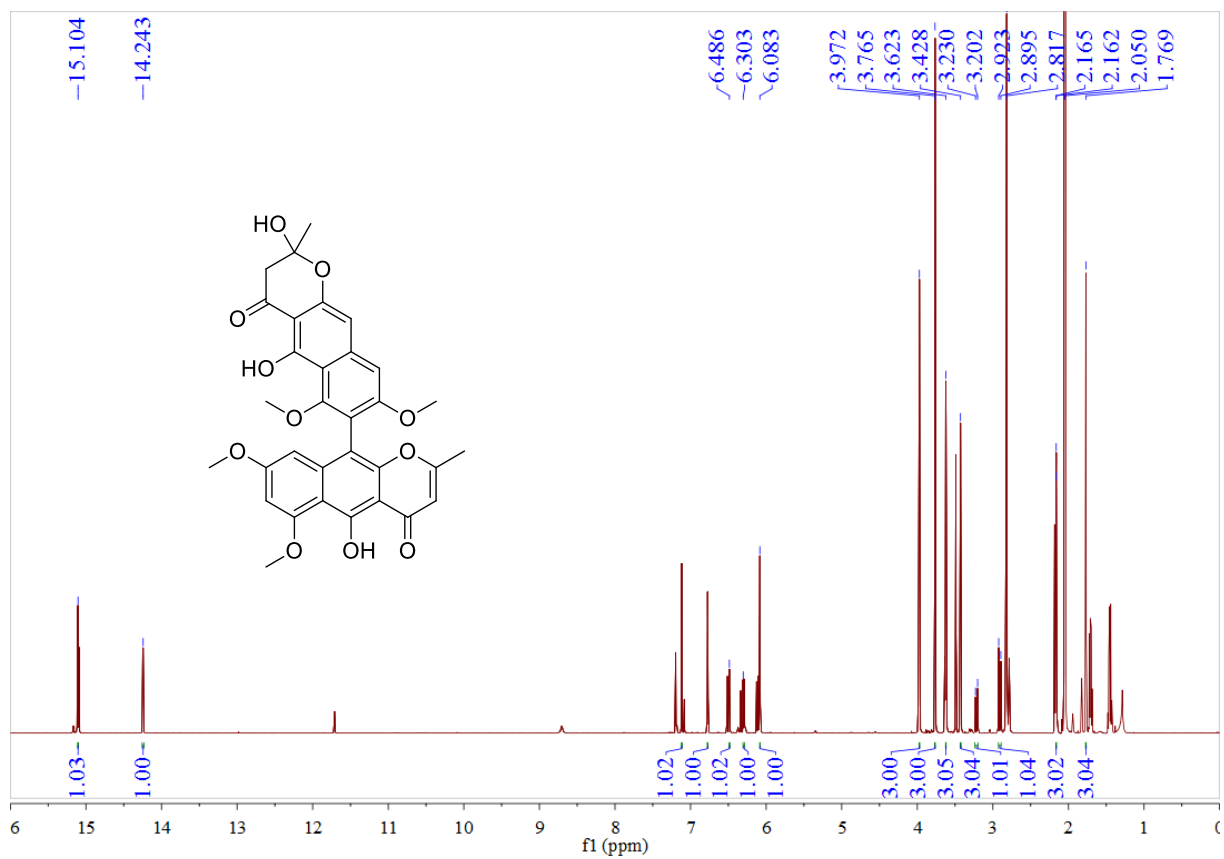

Figure S37. The <sup>1</sup>H NMR spectrum (600 MHz) of **11** in acetone-*d*<sub>6</sub>

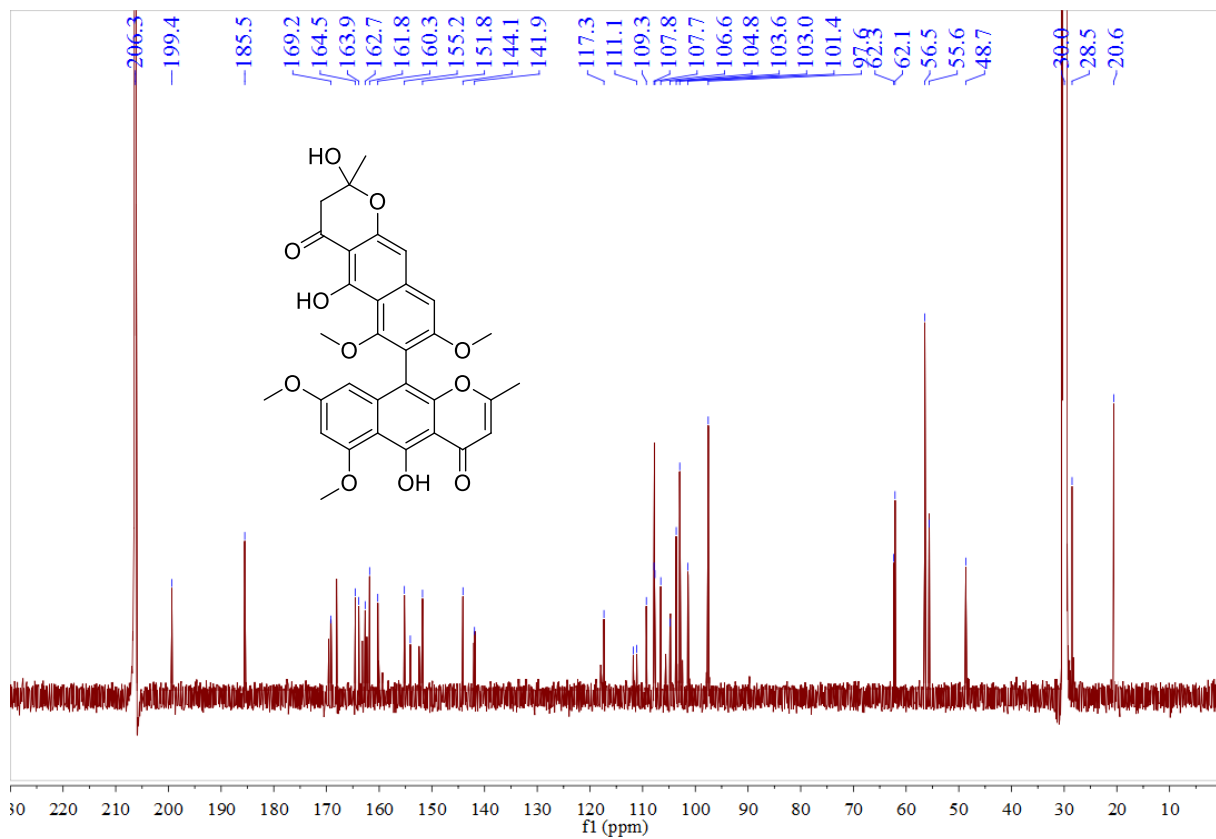

Figure S38. The <sup>13</sup>C NMR spectrum (150 MHz) of **11** in acetone-*d*<sub>6</sub>

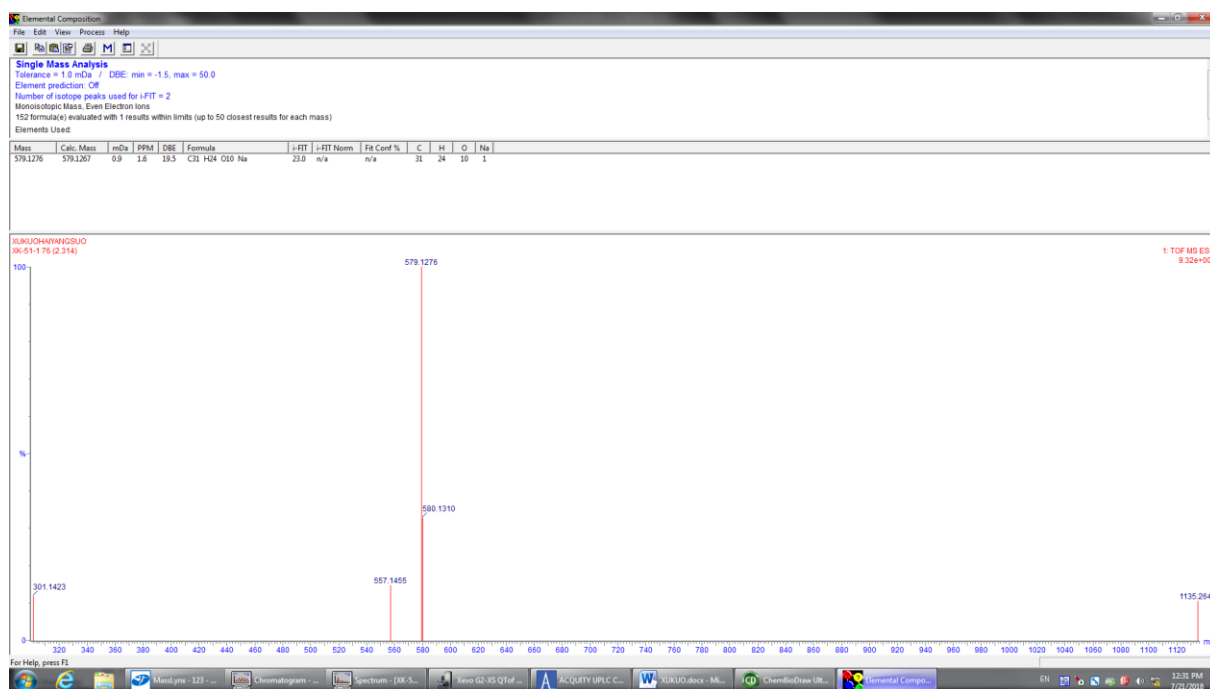

Figure S39. The HR-ESI-MS data of **12**

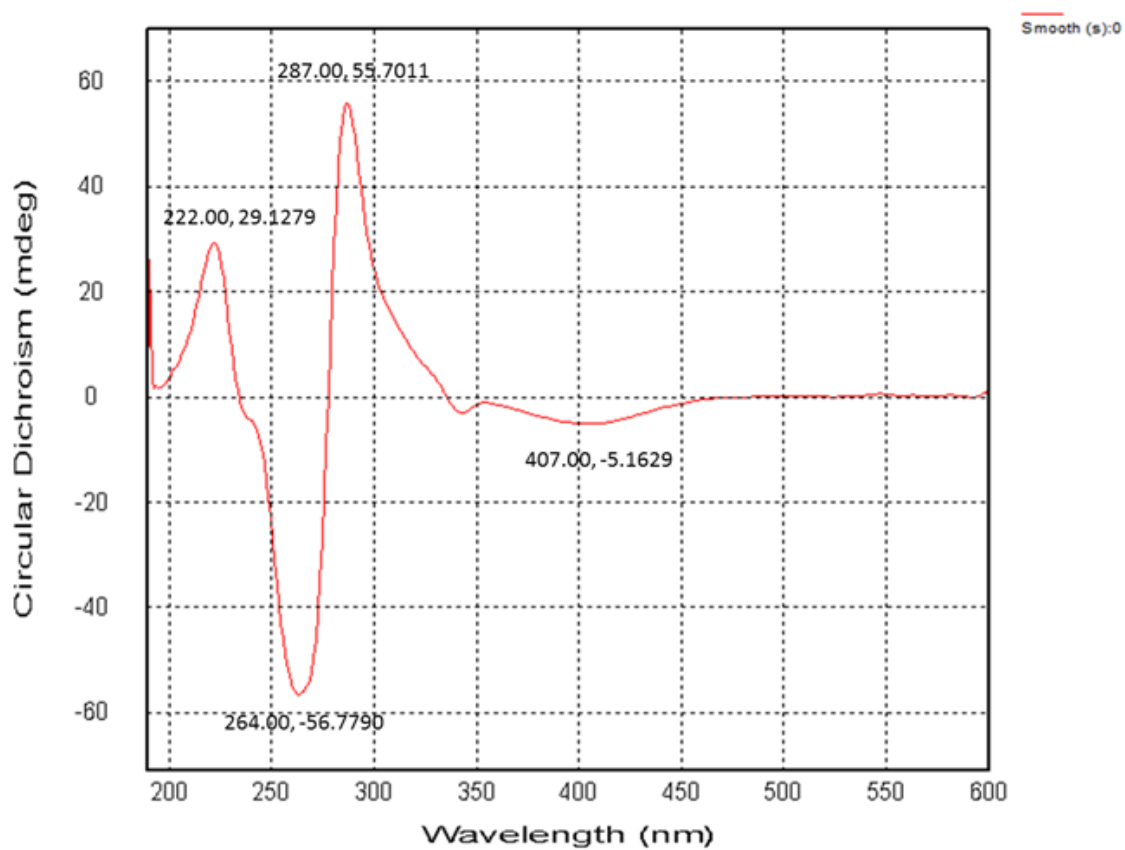

Figure S40. The ECD spectrum of **12** in MeOH

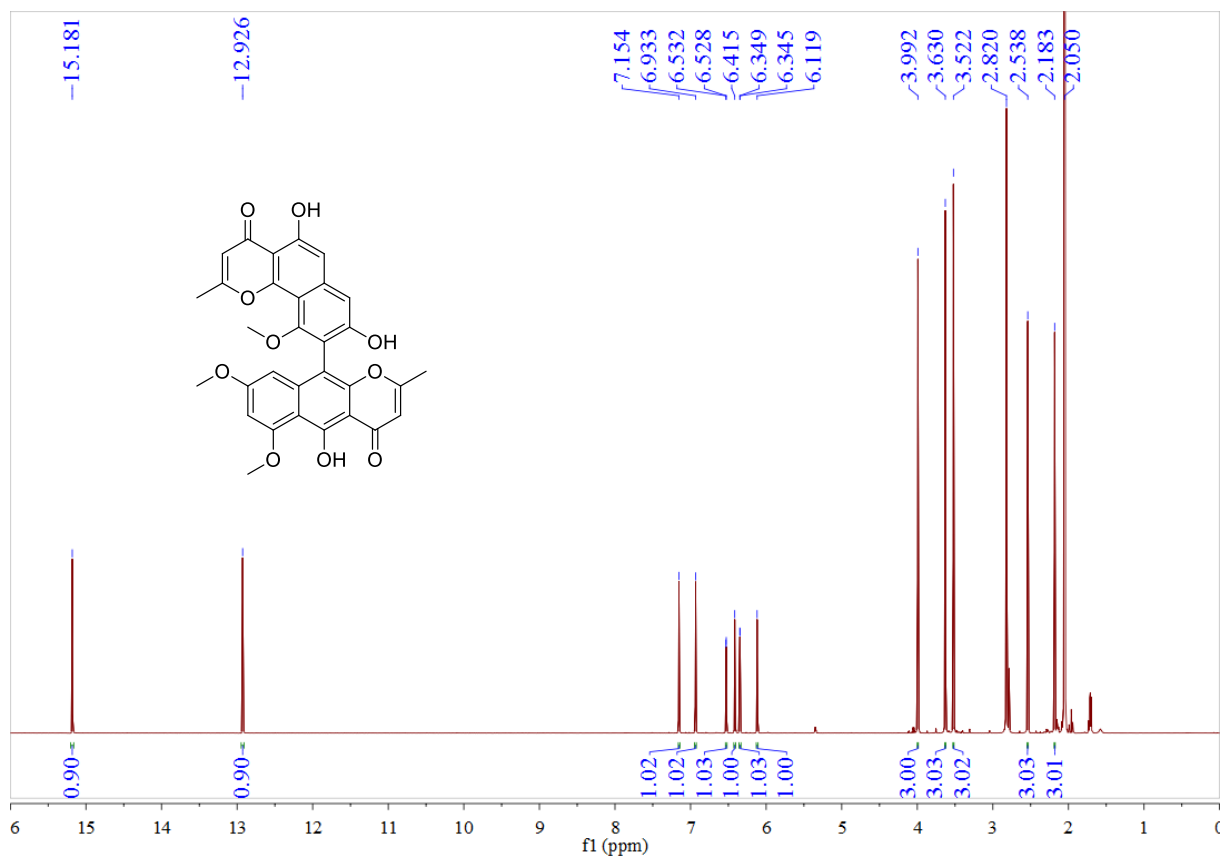

Figure S41. The  $^1\text{H}$  NMR spectrum (600 MHz) of **12** in acetone- $d_6$

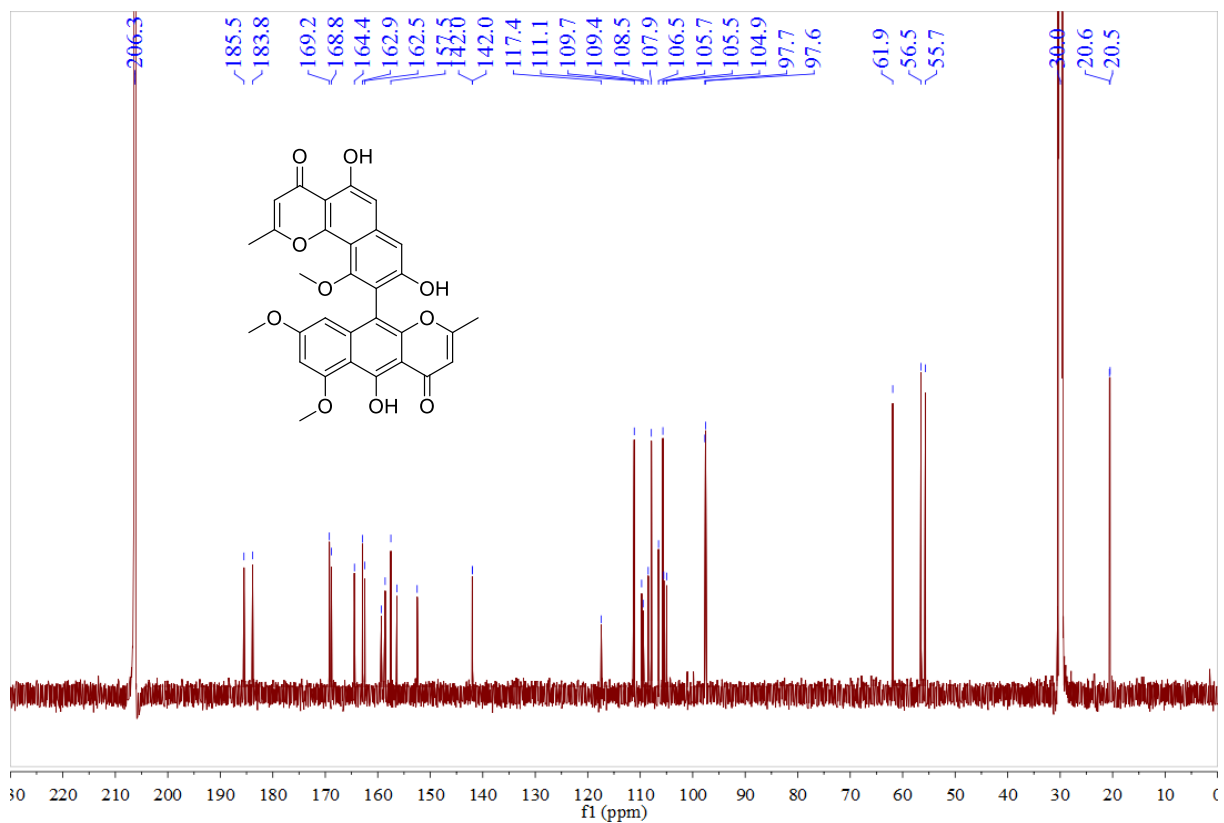

Figure S42. The  $^{13}\text{C}$  NMR spectrum (150 MHz) of **12** in acetone- $d_6$



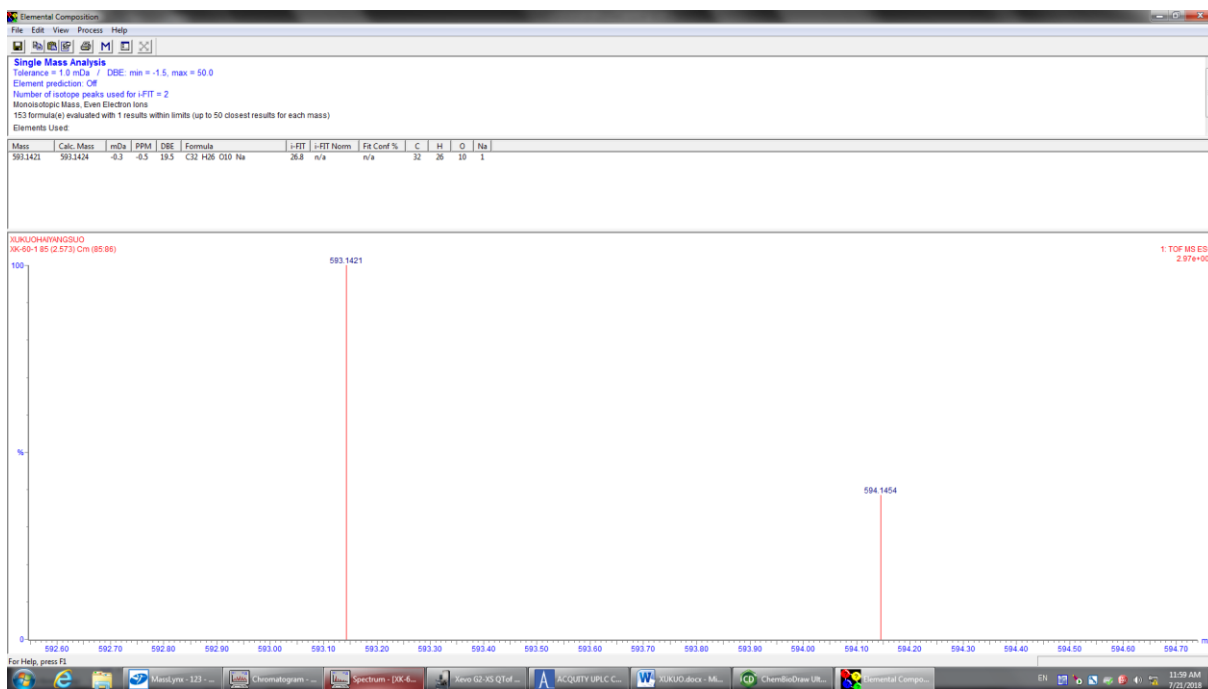

Figure S43. The HR-ESI-MS data of **13**

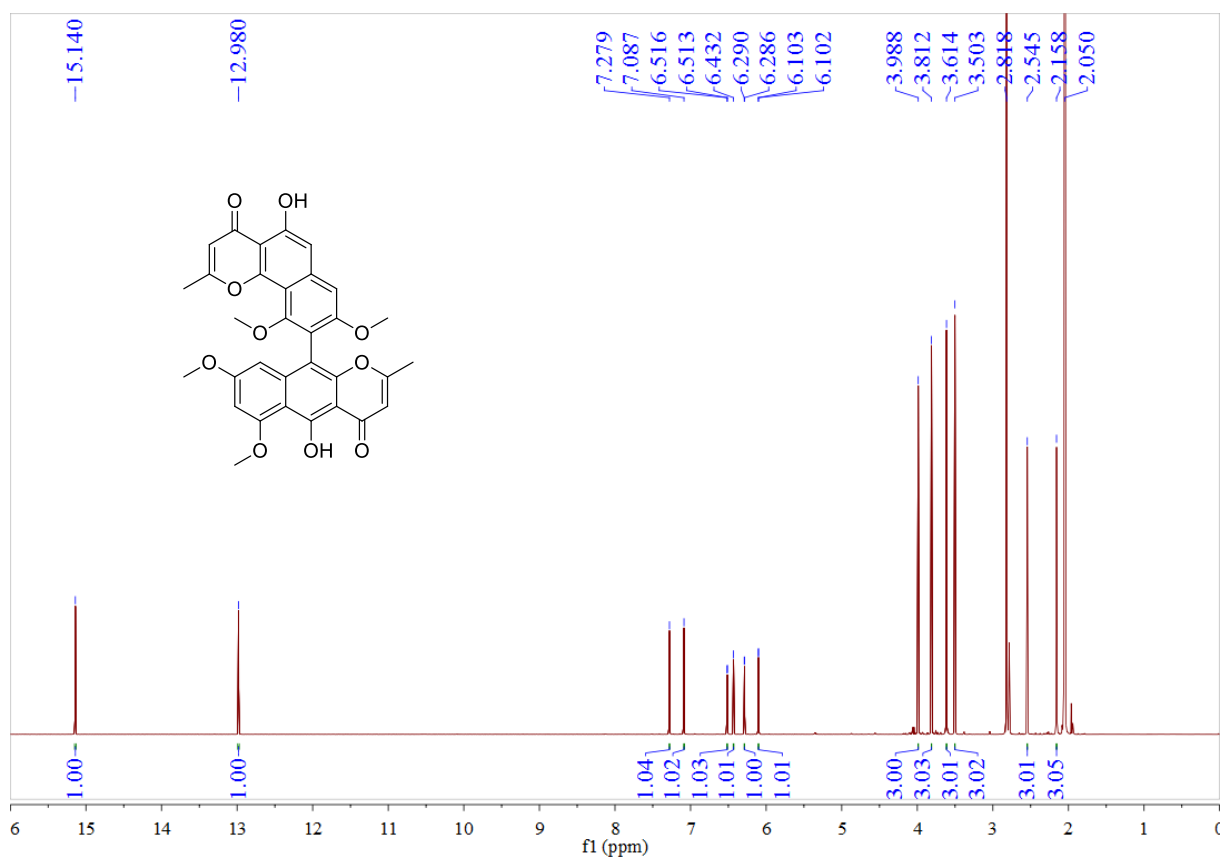

Figure S44. The <sup>1</sup>H NMR spectrum (600 MHz) of **13** in acetone-*d*<sub>6</sub>

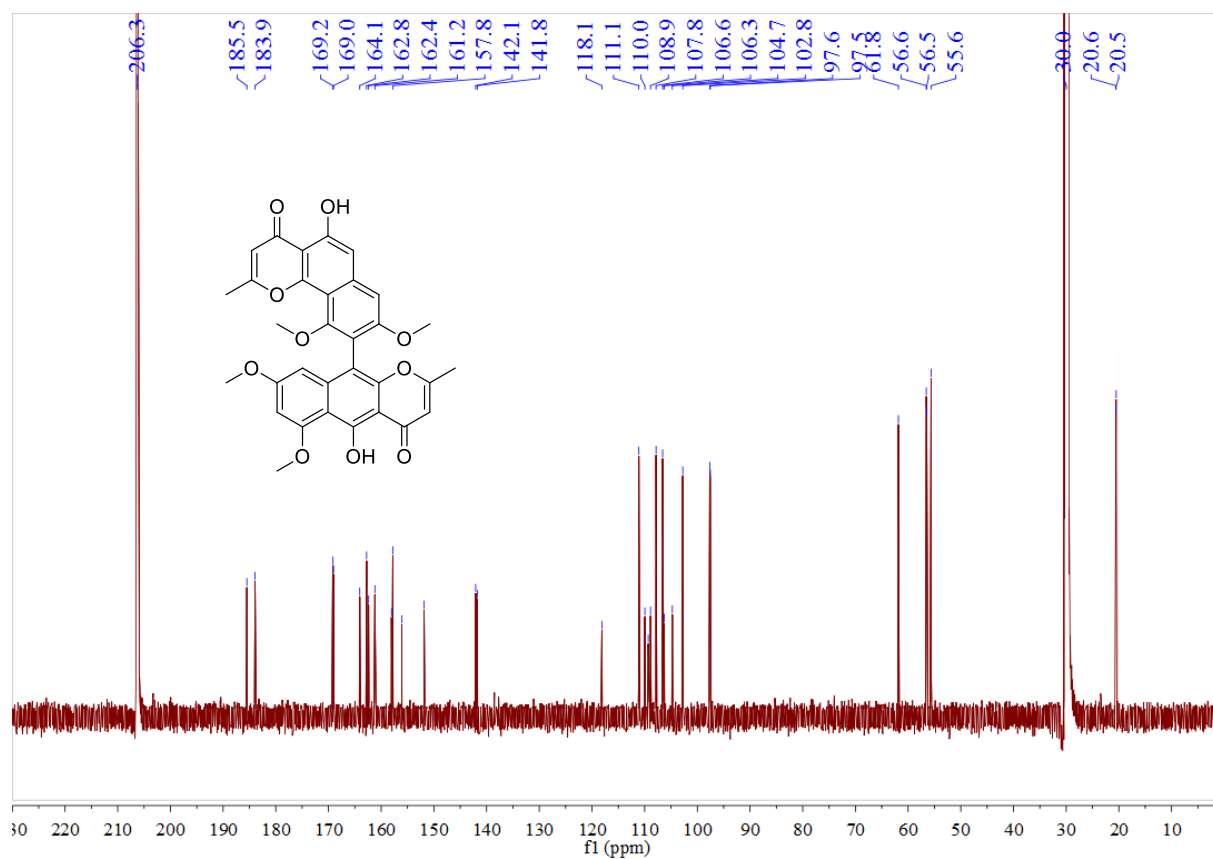

Figure S45. The  $^{13}\text{C}$  NMR spectrum (150 MHz) of 13 in acetone- $d_6$

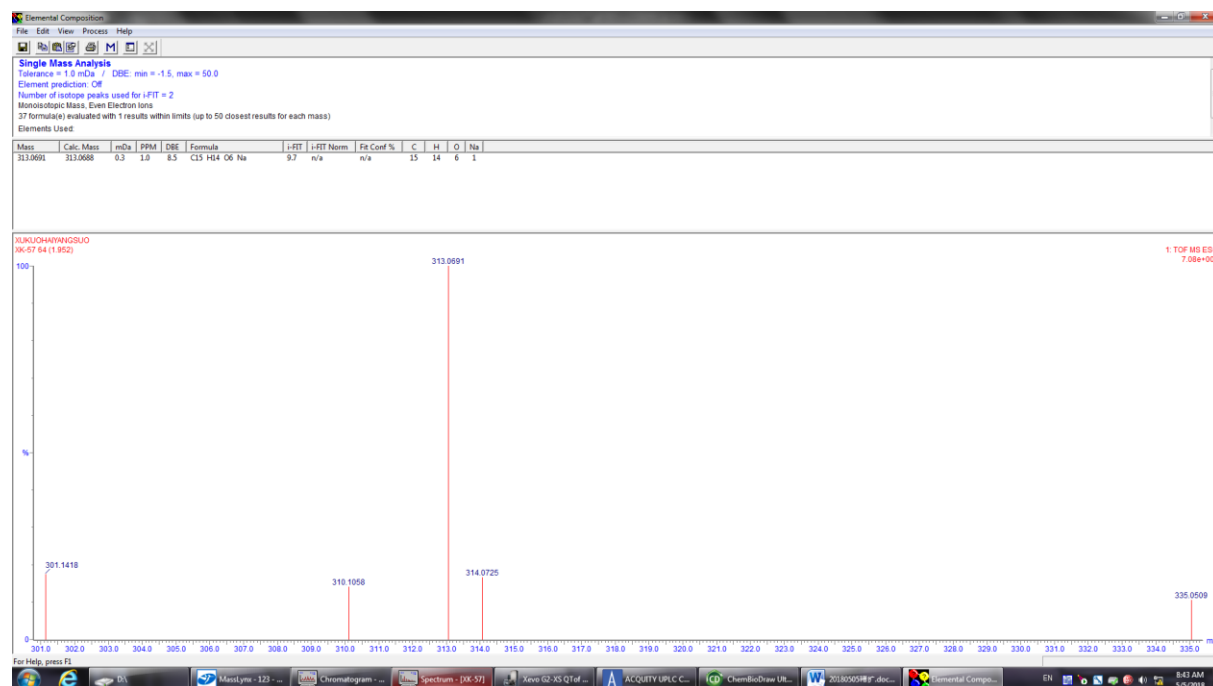

Figure S46. The HR-ESI-MS data of 14

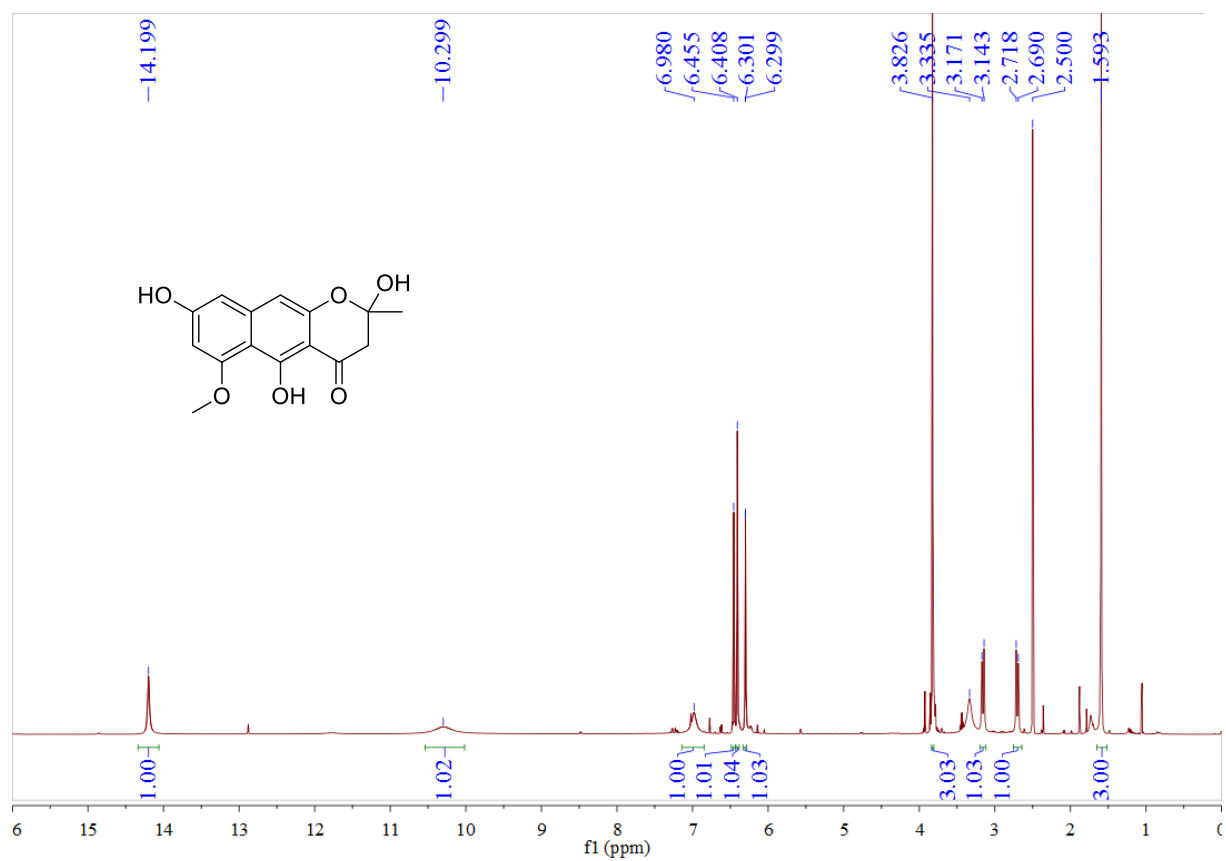

Figure S47. The <sup>1</sup>H NMR spectrum (600 MHz) of 14 in DMSO-*d*<sub>6</sub>

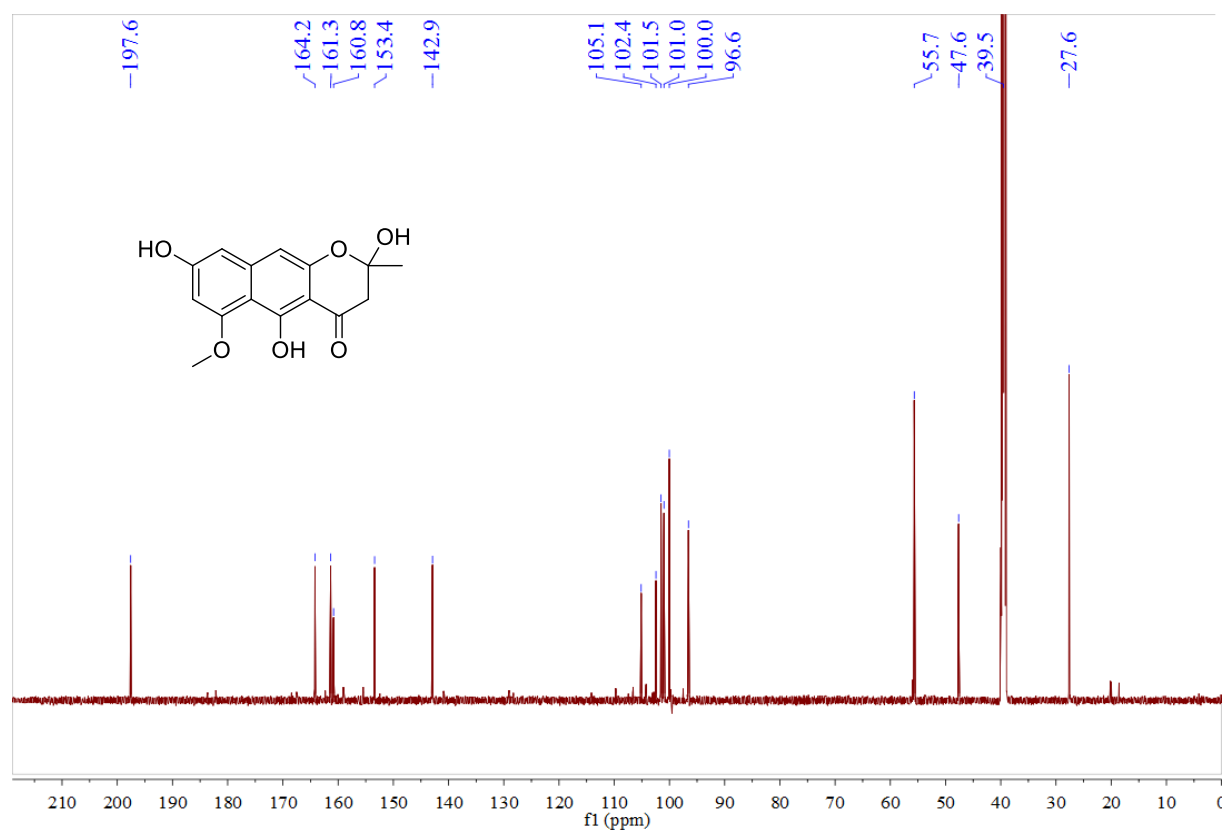

Figure S48. The <sup>13</sup>C NMR spectrum (150 MHz) of 14 in DMSO-*d*<sub>6</sub>

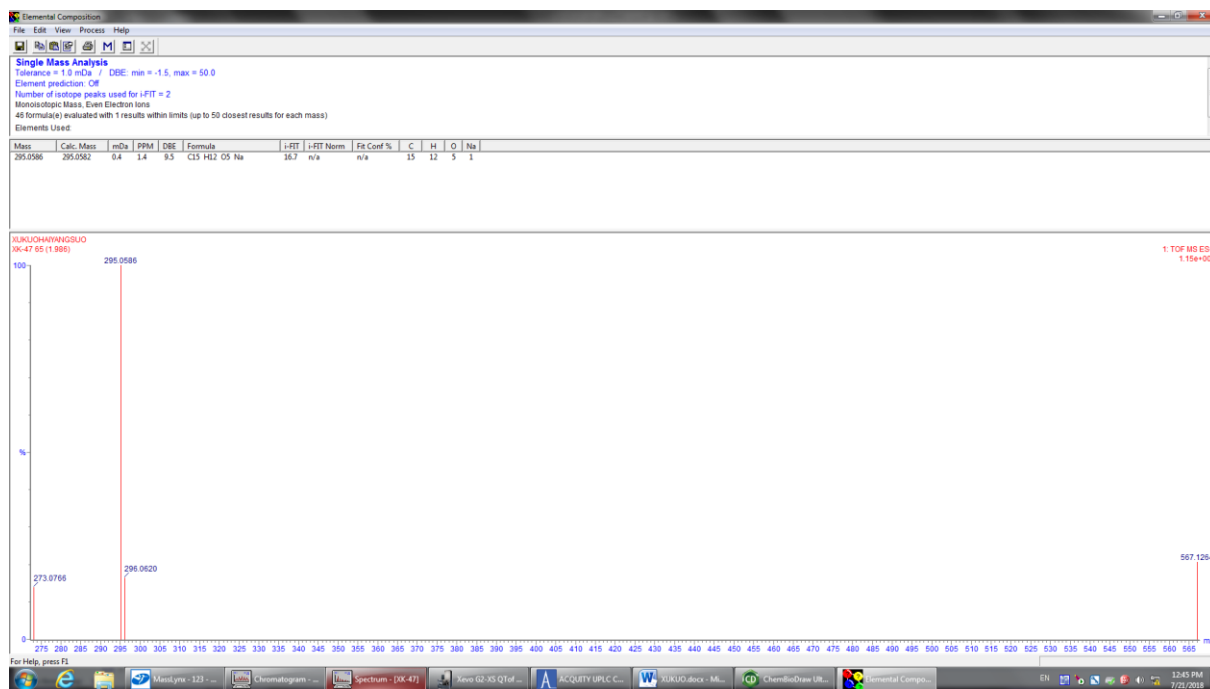

Figure S49. The HR-ESI-MS data of **15**

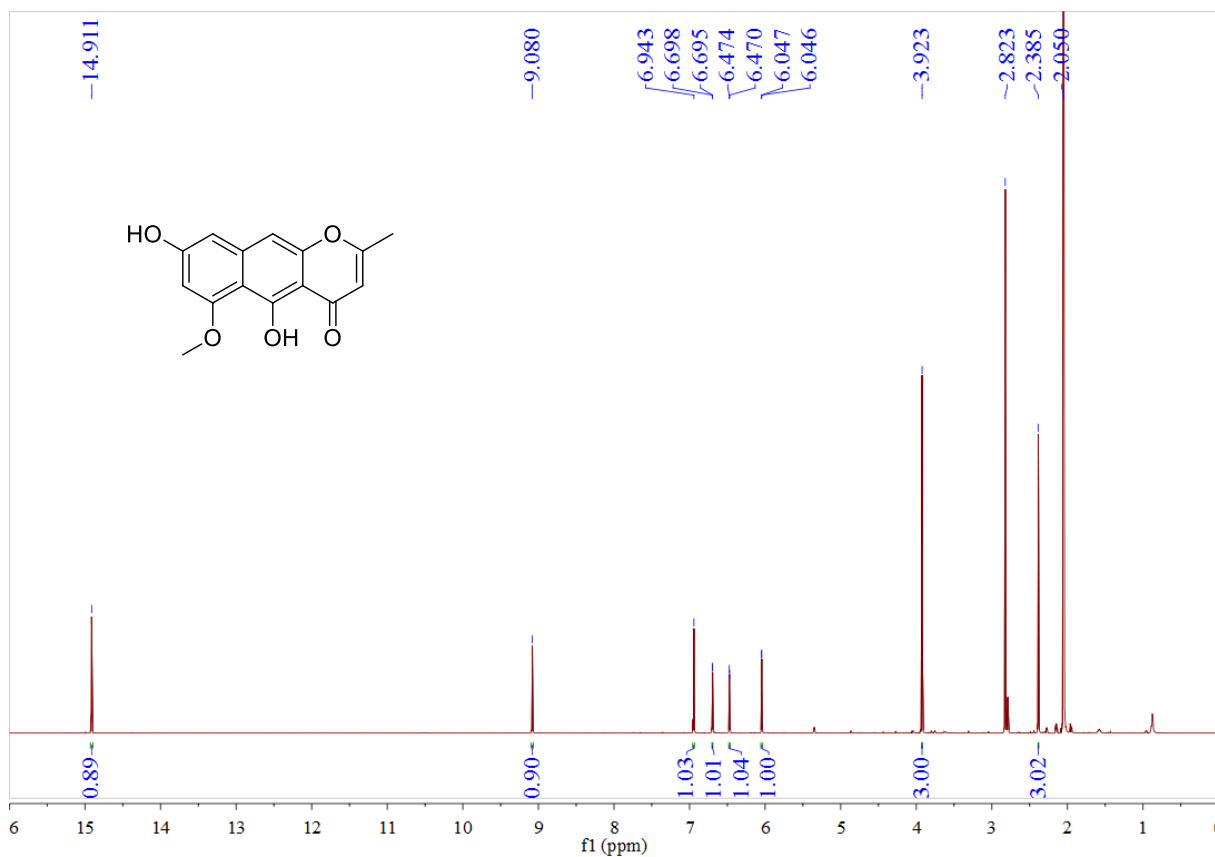

Figure S50. The  $^1\text{H}$  NMR spectrum (600 MHz) of **15** in acetone- $d_6$

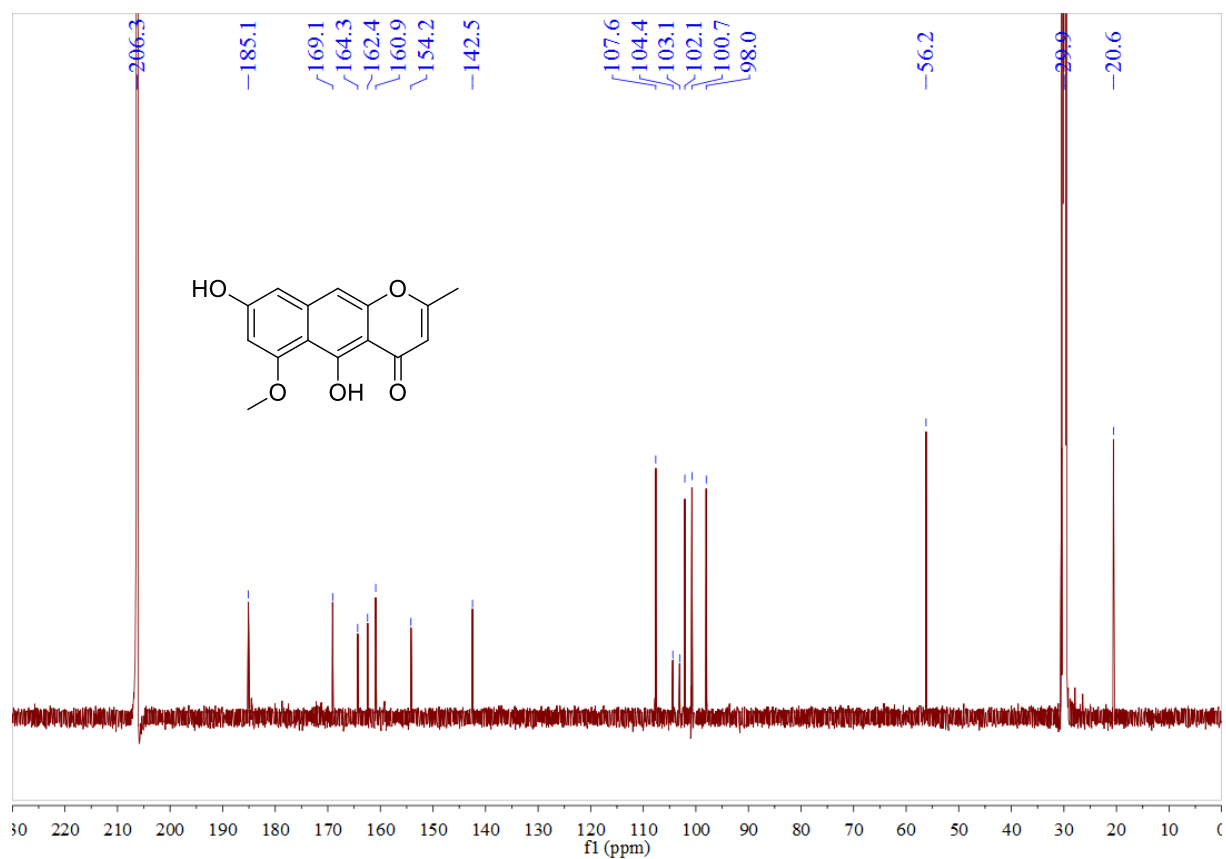

Figure S51. The  $^{13}\text{C}$  NMR spectrum (150 MHz) of 15 in acetone- $d_6$

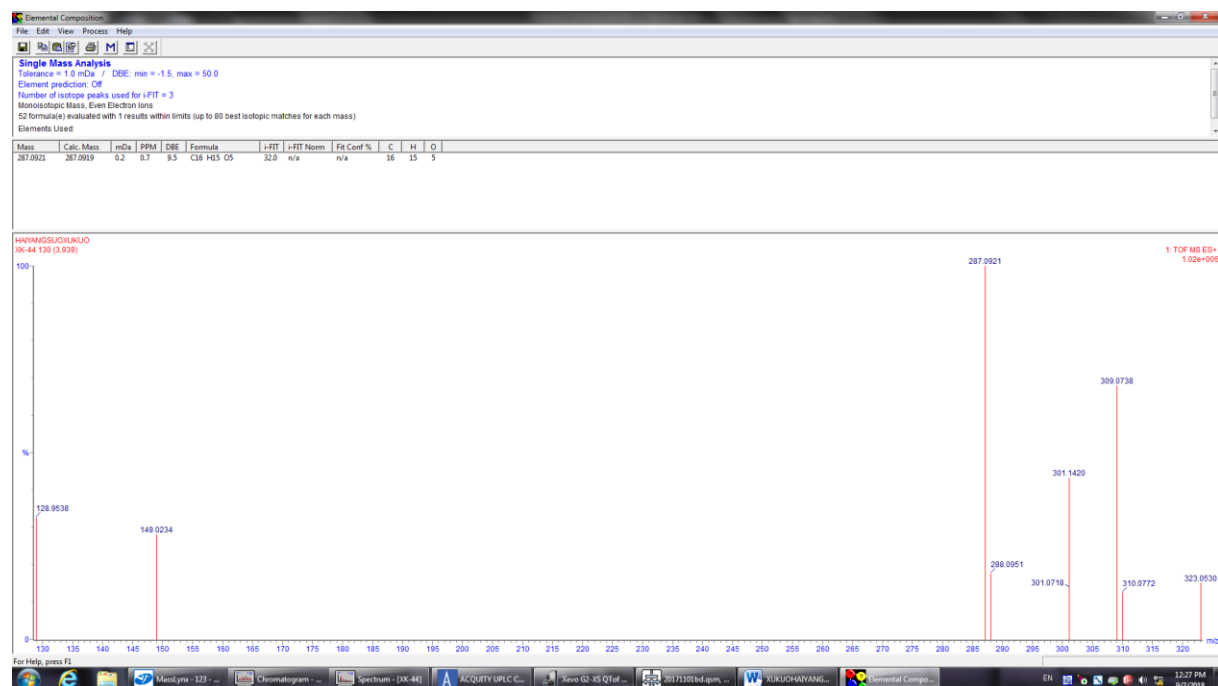

Figure S52. The HR-ESI-MS data of 16

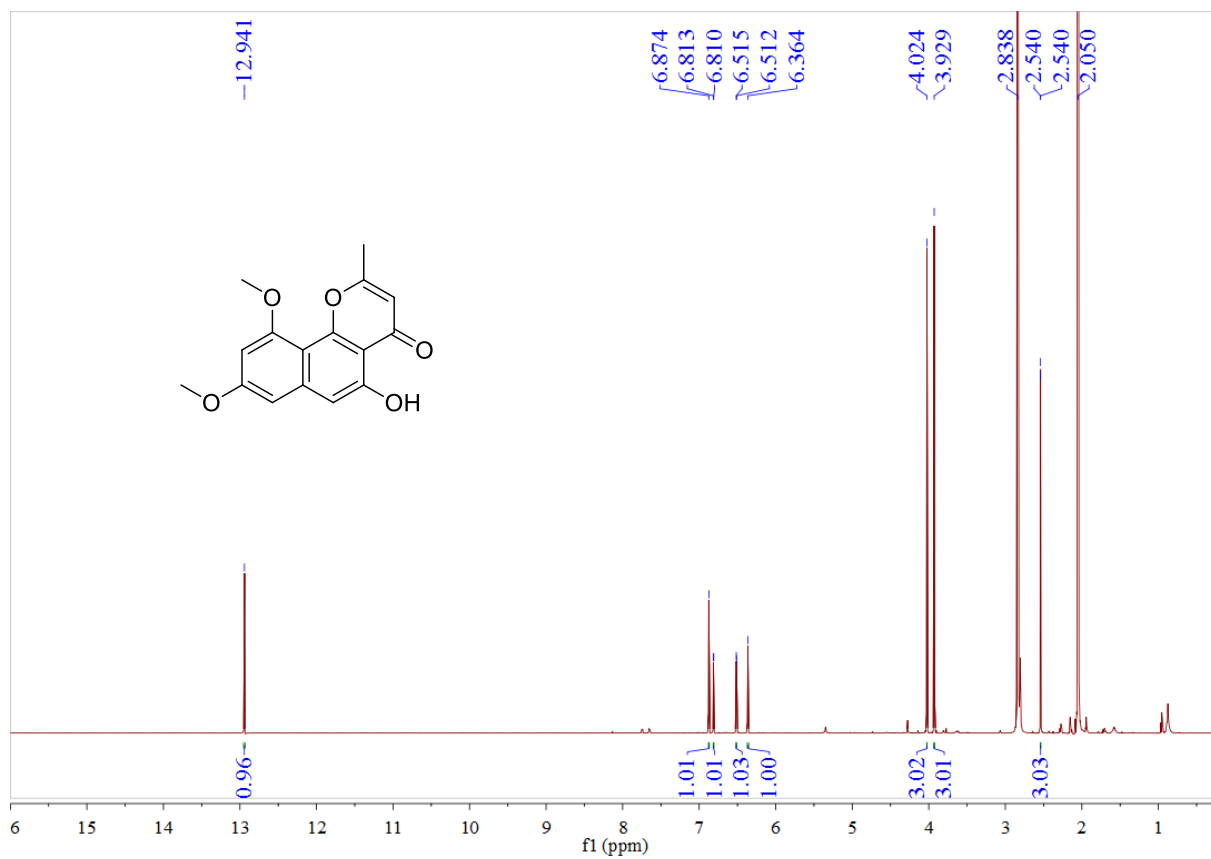

Figure S53. The  $^1\text{H}$  NMR spectrum (600 MHz) of **16** in acetone- $d_6$

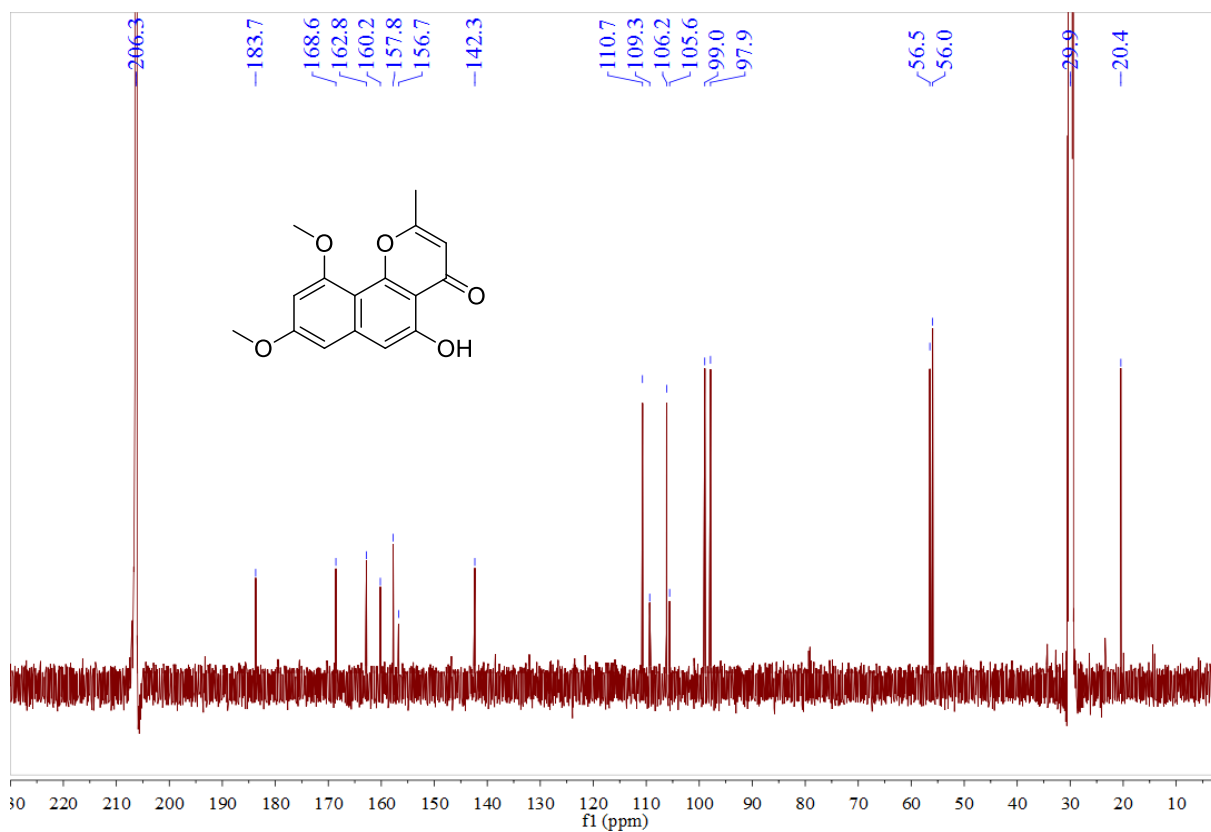

Figure S54. The  $^{13}\text{C}$  NMR spectrum (150 MHz) of **16** in acetone- $d_6$

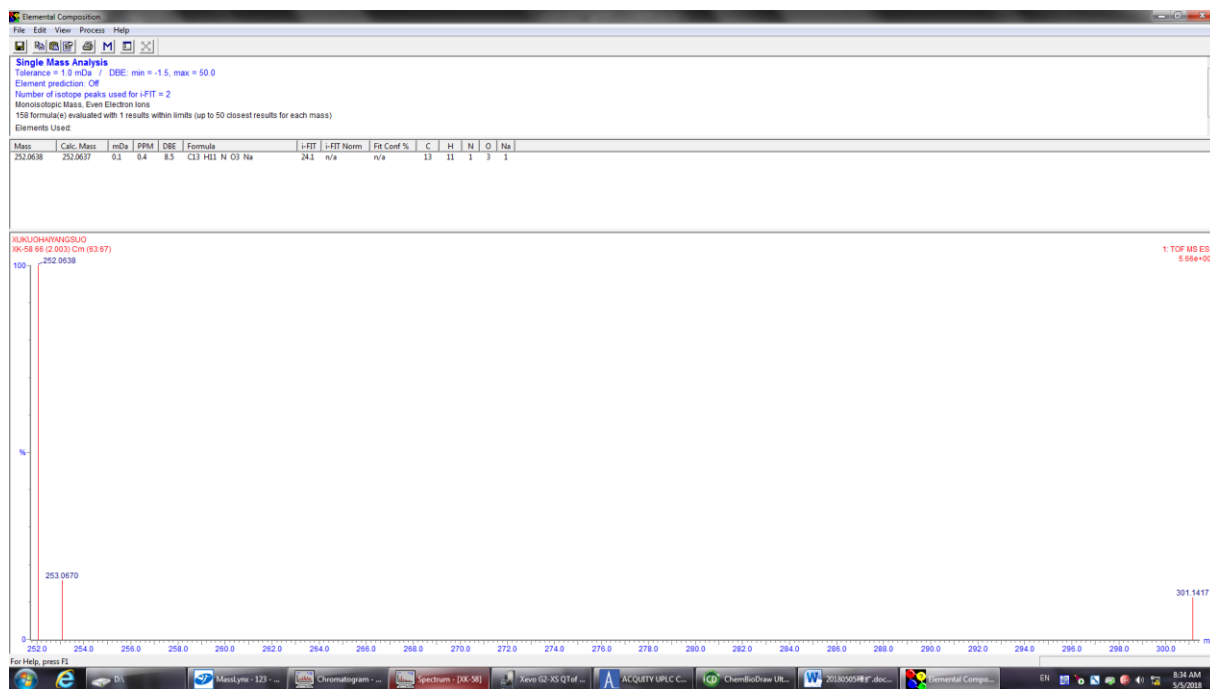

Figure S55. The HR-ESI-MS data of 17

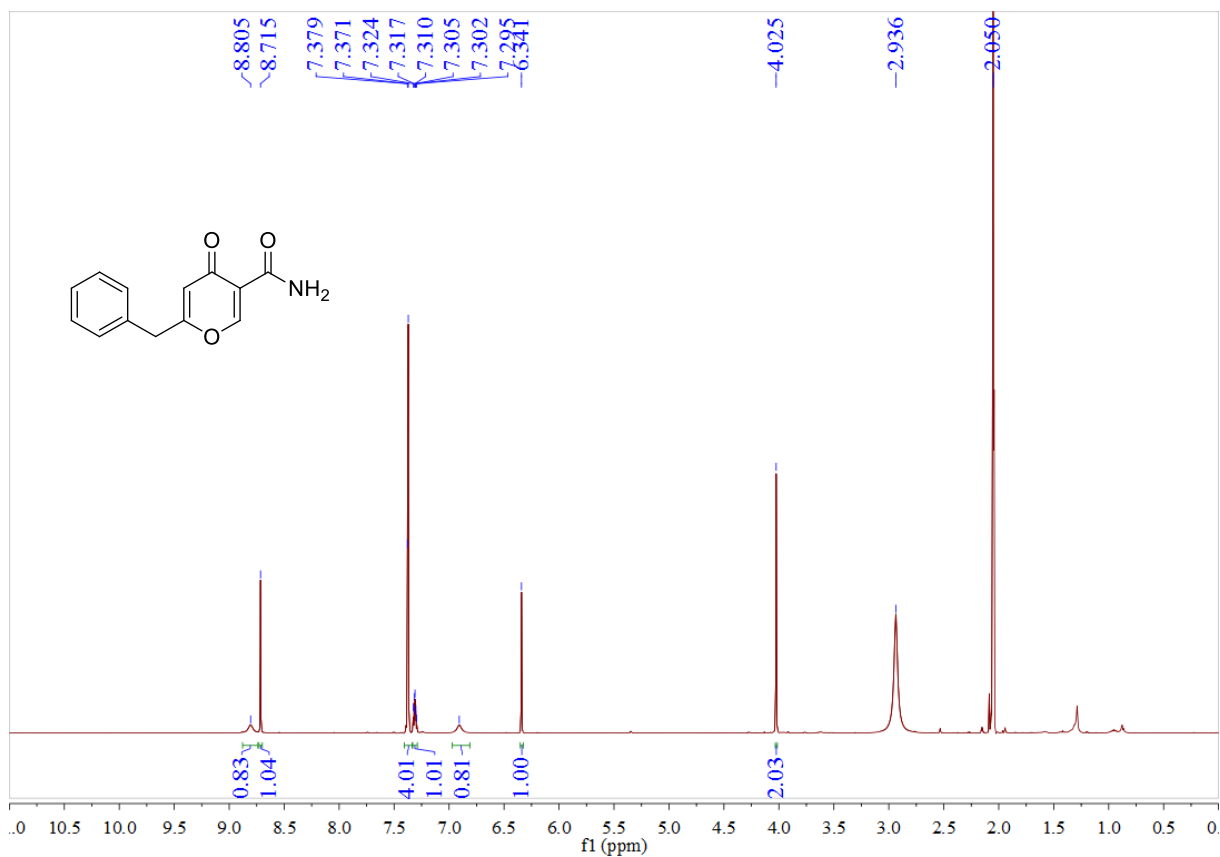

Figure S56. The <sup>1</sup>H NMR spectrum (600 MHz) of 17 in acetone-*d*<sub>6</sub>

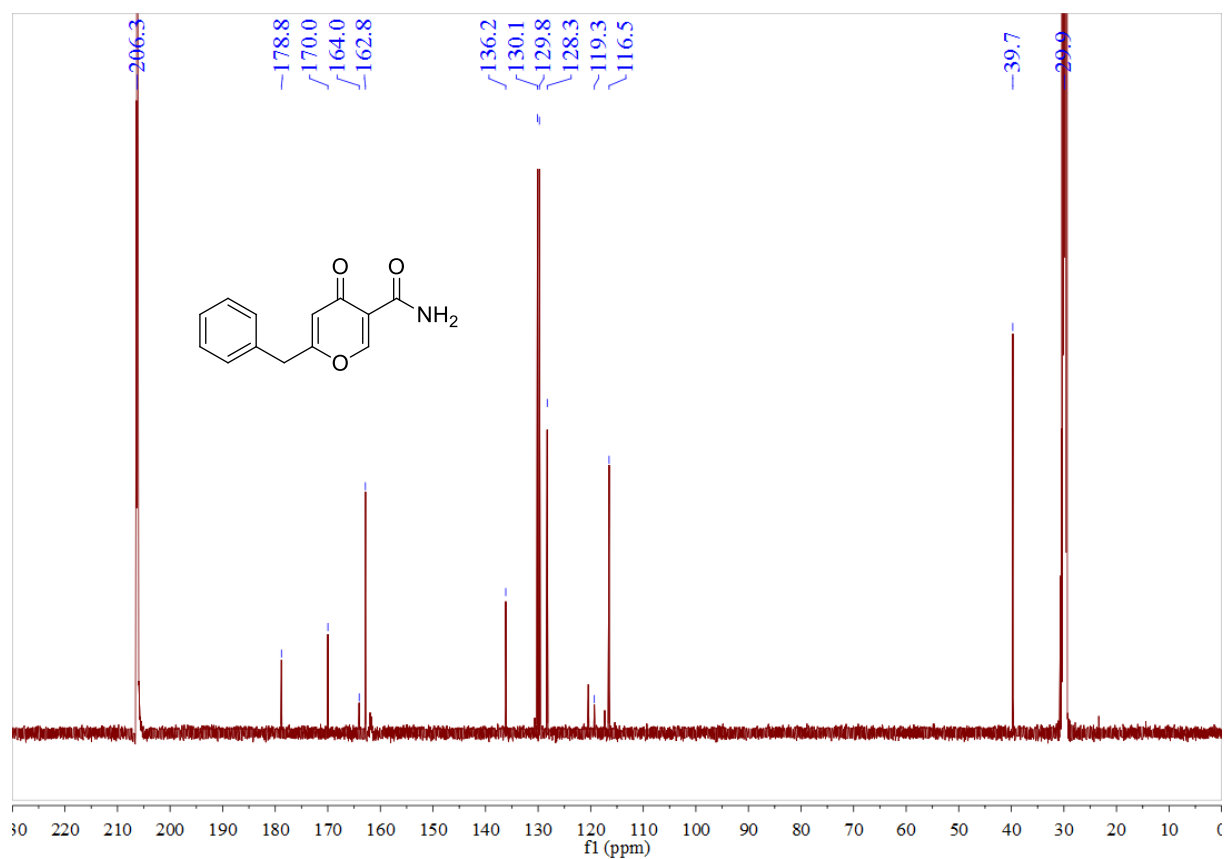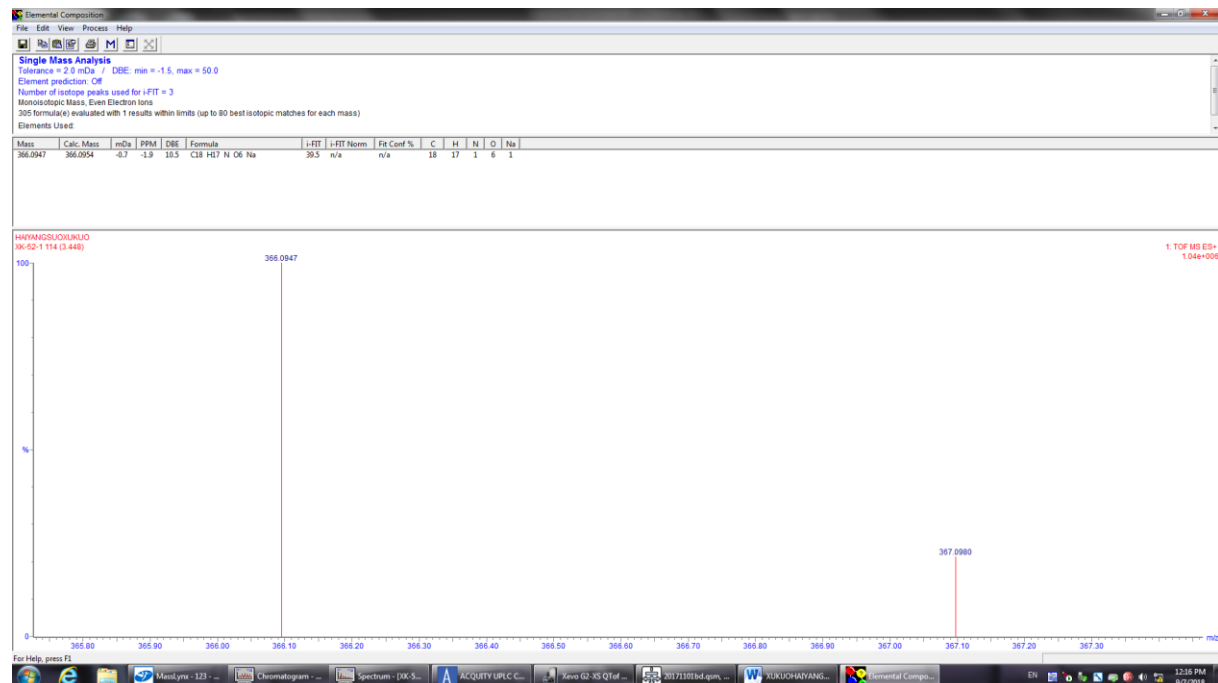



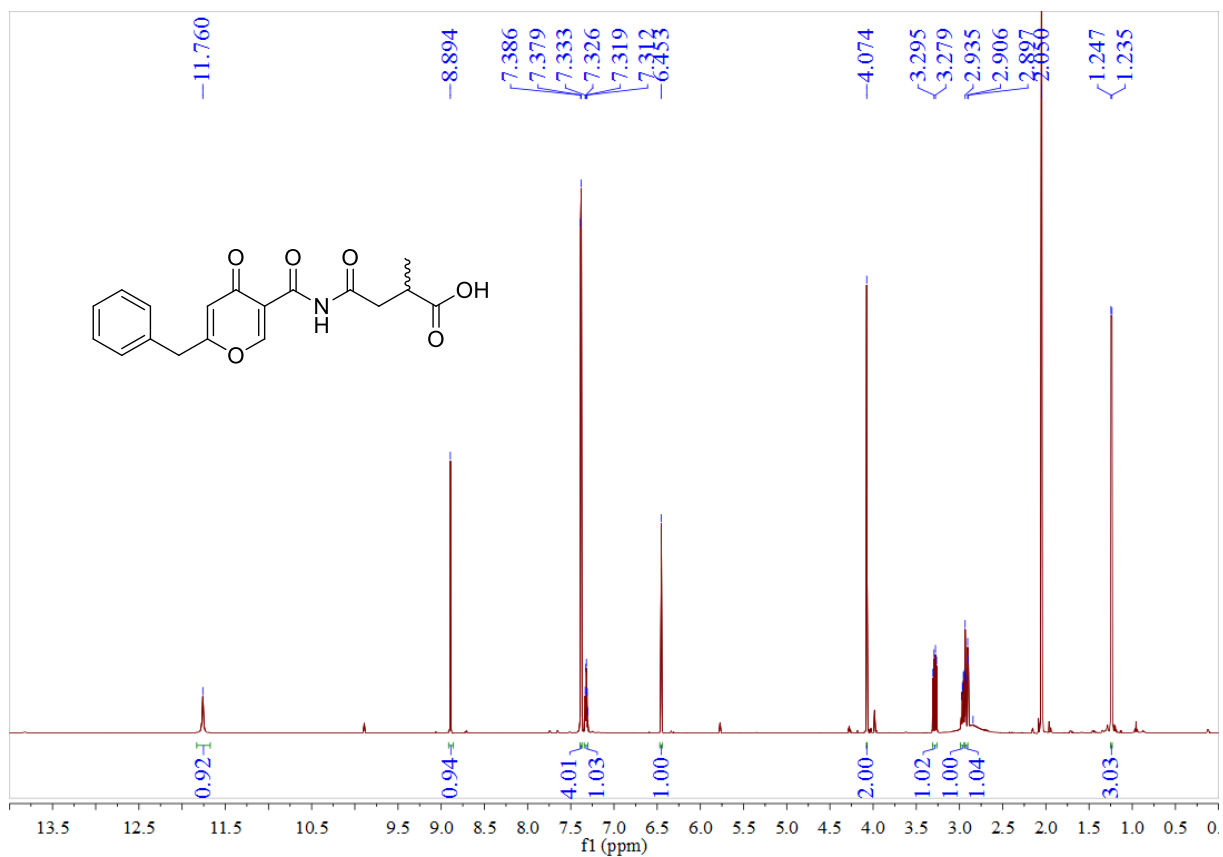

Figure S59. The  $^1\text{H}$  NMR spectrum (600 MHz) of **18** in acetone- $d_6$

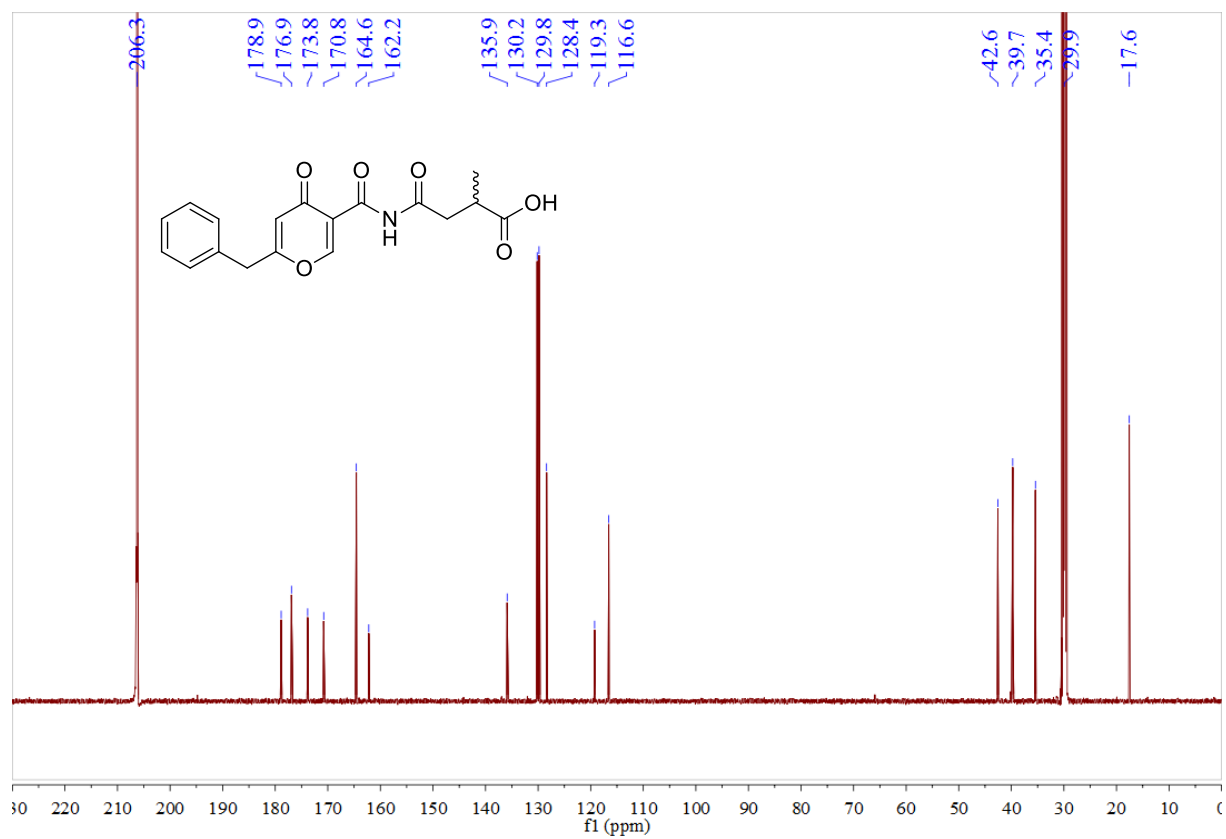

Figure S60. The  $^{13}\text{C}$  NMR spectrum (150 MHz) of **18** in acetone- $d_6$

## General procedure for ECD calculations

In general, conformational analyses of compounds **1** and **12** are carried out via systematic searching in the WaveFunction Spartan 14 (version 1.1.4) using the MMFF94 force field. Conformers with Boltzmann distribution over 1% are chosen as the beginning for ECD calculations. Ground-state geometries are optimized at the B3LYP/6-311+G(d,p) level in gas phase by the Gaussian 16 program (Gaussian Inc., Wallingford, CT, USA).<sup>1</sup> All quantum computations are performed on an IBM cluster machine located at the High Performance Computing Center of Peking Union Medical College. The energies, oscillator strengths, and rotational strengths (velocity) of the first 50 electronic excitations are calculated using the TD-DFT methodology at the B3LYP/6-311+G(d,p) level in methanol. The ECD spectra are simulated by the overlapping Gaussian function (half the bandwidth at 1/e peak height, 0.25 eV).<sup>2</sup> By comparison of the calculated and experimental ECD spectra, the absolute configurations of these compounds are established.

**Table 1.** The 3D conformers of **1** and **12** with Boltzmann distribution over 1%.

| Compounds | no. | 3D Conformers                                                                       | $\Delta G$ (kcal/mol) | Population (%) |
|-----------|-----|-------------------------------------------------------------------------------------|-----------------------|----------------|
| <b>1</b>  | 1   | 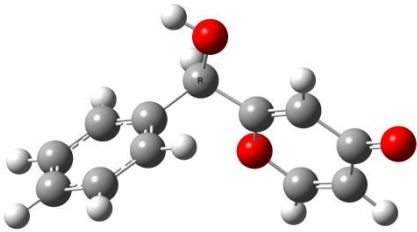 | 0.00                  | 79.7           |
|           | 2   |  | 5.92                  | 7.3            |

|    |   |                                                                                     |       |       |
|----|---|-------------------------------------------------------------------------------------|-------|-------|
|    | 3 | 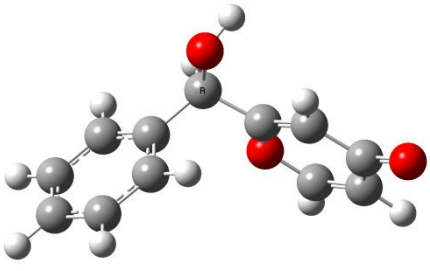   | 6.73  | 5.3   |
|    | 4 |    | 7.48  | 3.9   |
|    | 5 |   | 8.39  | 0.027 |
|    | 6 |  | 10.54 | 1.1   |
| 12 | 1 |  | 0.00  | 100.0 |

## References:

1. Frisch, M. J.; Trucks, G. W.; Schlegel, H. B.; Scuseria, G. E.; Robb, M. A.; Cheeseman, J. R.; Scalmani, G.; Barone, V.; Mennucci, B.; Petersson, G. A.; Nakatsuji, H.; Caricato, M.; Li, X.; Hratchian, H. P.; Izmaylov, A. F.; Bloino, J.; Zheng, G.; Sonnenberg, J. L.; Hada, M.; Ehara, M.; Toyota, K.; Fukuda, R.; Hasegawa, J.; Ishida, M.; Nakajima, T.; Honda, Y.; Kitao, O.; Nakai, H.; Vreven, T.; Montgomery, Jr., J. A.; Peralta, J. E.; Ogliaro, F.; Bearpark, M.; Heyd, J. J.; Brothers, E.; Kudin, K. N.; Staroverov, V. N.; Kobayashi, R.; Normand, J.; Raghavachari, K.; Rendell, A.; Burant, J. C.; Iyengar, S. S.; Tomasi, J.; Cossi, M.; Rega, N.; Millam, J. M.; Klene, M.; Knox, J. E.; Cross, J. B.; Bakken, V.; Adamo, C.; Jaramillo, J.; Gomperts, R.; Stratmann, R. E.; Yazyev, O.; Austin, A. J.; Cammi, R.; Pomelli, C.; Ochterski, J. W.; Martin, R. L.; Morokuma, K.; Zakrzewski, V. G.; Voth, G. A.; Salvador, P.; Dannenberg, J. J.; Dapprich, S.; Daniels, A. D.; Farkas, Ö.; Foresman, J. B.; Ortiz, J. V.; Cioslowski, J.; Fox, D. J. Gaussian 09, Rev. C 01; Gaussian, Inc., Wallingford CT, 2009.
2. Stephens, P. J.; Harada, N. ECD cotton effect approximated by the Gaussian curve and other methods. *Chirality* **2010**, *22*, 229–233.

# Analytical HPLC spectra for all isolated compounds (1-18)

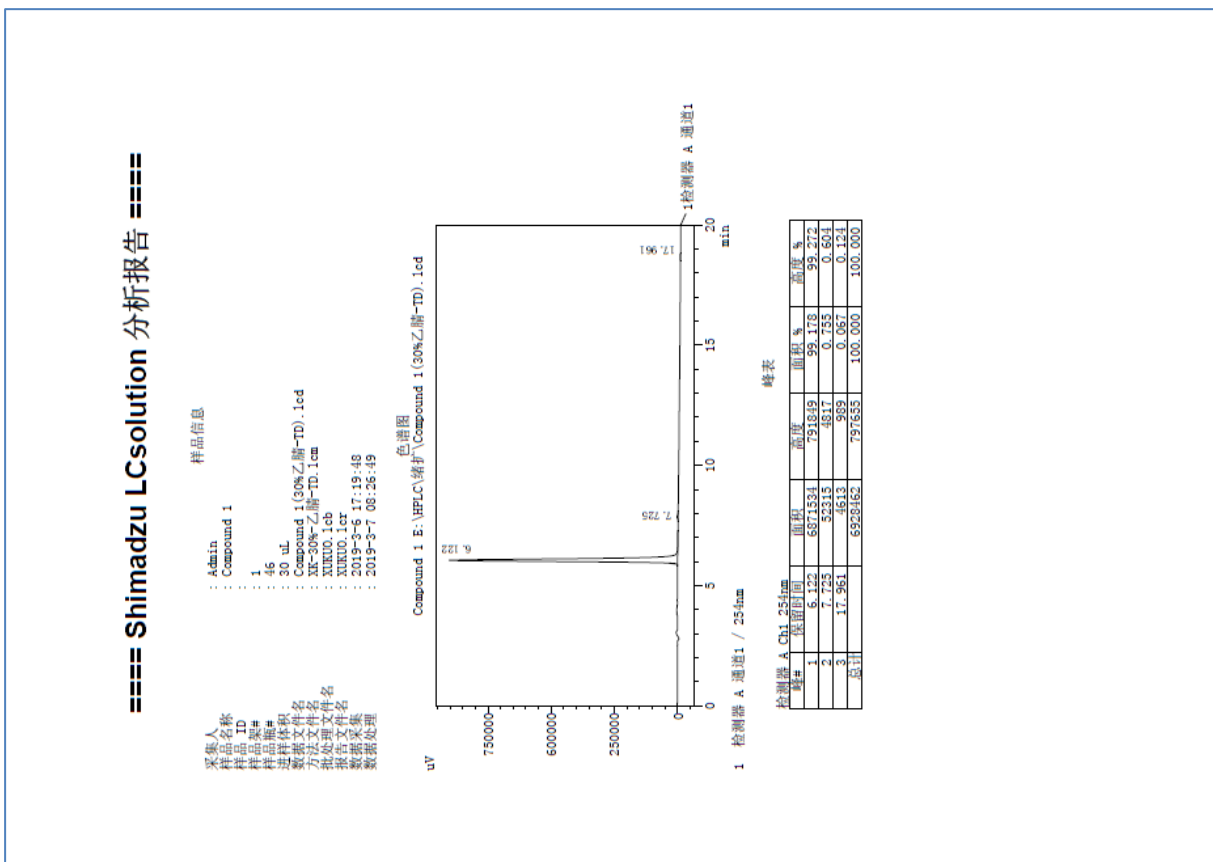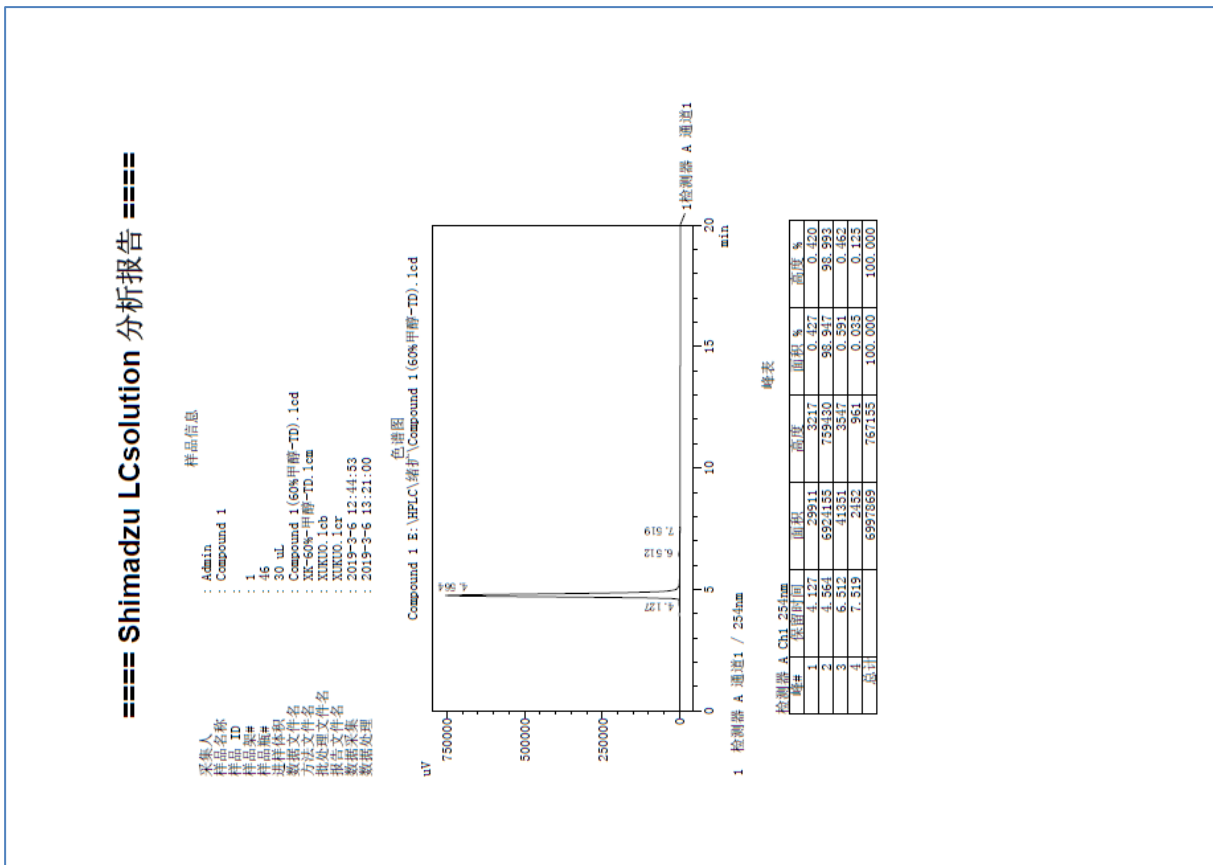

# ==== Shimadzu LCsolution 分析报告 ====

样品信息  
 采集人 : Admin  
 样品名称 : Compound 2  
 样品ID : 1  
 样品架# : 47  
 样品瓶# : 60 uL  
 进样体积 : Compound 2 (60%甲醇-TD).1cd  
 方法文件名 : XF-60%甲醇-TD.1cm  
 数据文件名 : XMK00.1cb  
 批号 : XMK00.1cb  
 批号文件名 : 2019-3-7 13:08:24  
 采集日期 : 2019-3-8 13:38:44  
 数据处理 : 数据处理

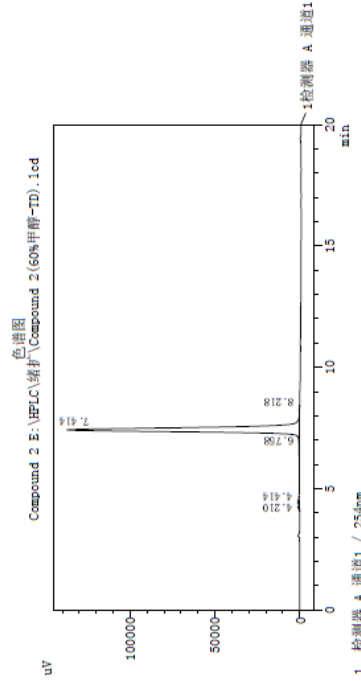

峰表

| 峰# | 保留时间  | 面积      | 高度     | 面积%     | 高度%     |
|----|-------|---------|--------|---------|---------|
| 1  | 4.41  | 10749   | 956    | 0.115   | 0.871   |
| 2  | 4.41  | 10749   | 956    | 0.633   | 0.871   |
| 3  | 6.758 | 288     | 268    | 0.469   | 0.205   |
| 4  | 7.414 | 1575501 | 137290 | 98.313  | 98.258  |
| 5  | 6.218 | 2927    | 242    | 0.139   | 0.173   |
| 总计 |       | 1602332 | 139724 | 100.000 | 100.000 |

# ==== Shimadzu LCsolution 分析报告 ====

样品信息  
 采集人 : Admin  
 样品名称 : Compound 2  
 样品ID : 1  
 样品架# : 47  
 样品瓶# : 60 uL  
 进样体积 : Compound 2 (30%乙醇-TD).1cd  
 方法文件名 : XF-30%乙醇-TD.1cm  
 数据文件名 : XMK00.1cb  
 批号 : XMK00.1cb  
 批号文件名 : 2019-3-7 17:49:17  
 采集日期 : 2019-3-7 08:27:38  
 数据处理 : 数据处理

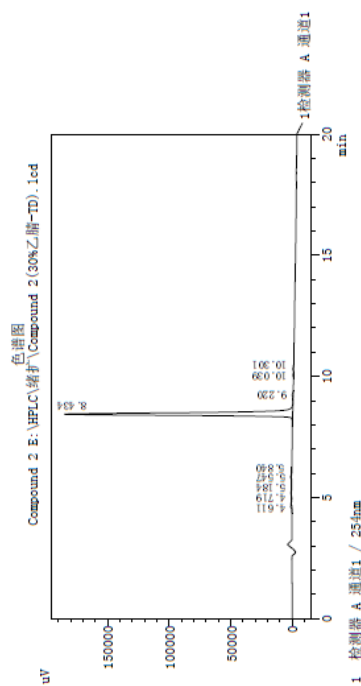

峰表

| 峰# | 保留时间   | 面积      | 高度     | 面积%     | 高度%     |
|----|--------|---------|--------|---------|---------|
| 1  | 4.511  | 6428    | 970    | 0.444   | 0.506   |
| 2  | 4.719  | 7637    | 624    | 0.527   | 0.430   |
| 3  | 5.181  | 10663   | 803    | 0.736   | 0.419   |
| 4  | 5.547  | 4283    | 329    | 0.296   | 0.172   |
| 5  | 5.840  | 10350   | 1115   | 0.715   | 0.582   |
| 6  | 8.434  | 1393574 | 165116 | 96.240  | 96.782  |
| 7  | 9.220  | 6286    | 797    | 0.410   | 0.418   |
| 8  | 10.039 | 4310    | 642    | 0.298   | 0.333   |
| 9  | 10.220 | 4824    | 681    | 0.351   | 0.357   |
| 10 | 10.301 | 1448022 | 191580 | 100.000 | 100.000 |

# ==== Shimadzu LCsolution 分析报告 ====

样品信息  
 采集人 : Admin  
 样品名称 : Compound 3  
 样品ID : 1  
 样品架# : 48  
 样品体积 : 30 uL  
 进样体积 : Compound 3 (60%甲醇-TD).1cd  
 数据文件名 : XK-60%-甲醇-TD.1cm  
 方法文件名 : XUKU0.1cb  
 报告文件名 : 2019-3-6 13:01:50  
 数据文件 : 2019-3-6 13:03:07  
 数据处理

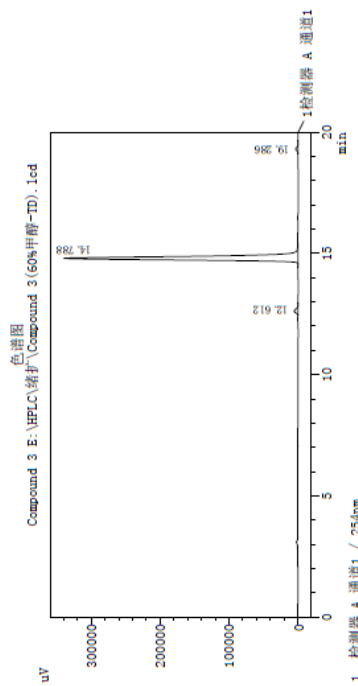

峰表

| 峰# | 保留时间   | 面积      | 高度     | 面积%     | 高度%     |
|----|--------|---------|--------|---------|---------|
| 1  | 14.62  | 49657   | 15609  | 97.172  | 97.270  |
| 2  | 14.788 | 330297  | 21036  | 1.067   | 1.128   |
| 3  | 14.288 | 3382429 | 249931 | 100.000 | 100.000 |
| 总计 |        |         |        |         |         |

# ==== Shimadzu LCsolution 分析报告 ====

样品信息  
 采集人 : Admin  
 样品名称 : Compound 3  
 样品ID : 1  
 样品架# : 48  
 样品体积 : 30 uL  
 进样体积 : Compound 3 (30%乙醇-TD).1cd  
 数据文件名 : XK-30%-乙醇-TD.1cm  
 方法文件名 : XUKU0.1cb  
 报告文件名 : 2019-3-7 08:06:46  
 数据文件 : 2019-3-7 08:06:40  
 数据处理

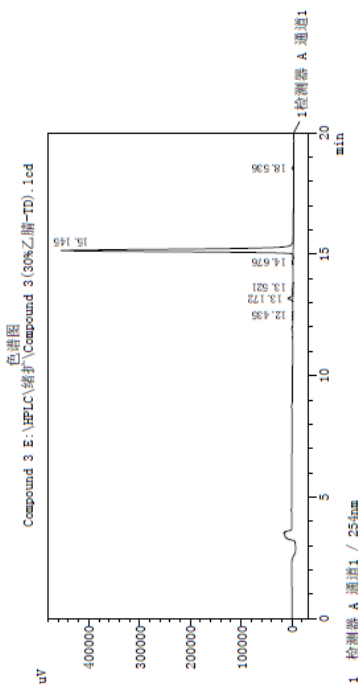

峰表

| 峰# | 保留时间   | 面积      | 高度     | 面积%     | 高度%     |
|----|--------|---------|--------|---------|---------|
| 1  | 12.435 | 6071    | 651    | 0.179   | 0.180   |
| 2  | 13.172 | 67739   | 9412   | 2.001   | 1.988   |
| 3  | 13.521 | 14056   | 1862   | 0.414   | 0.393   |
| 4  | 14.676 | 113800  | 1641   | 0.336   | 0.246   |
| 5  | 15.145 | 3263820 | 45710  | 96.433  | 96.471  |
| 6  | 18.536 | 21495   | 2954   | 0.635   | 0.623   |
| 总计 |        | 3384530 | 473830 | 100.000 | 100.000 |

# ==== Shimadzu LCsolution 分析报告 ====

样品信息

```

采集人       : Admin
样品名称     : Compound 4
样品ID      : 1
样品瓶#     : 49
样品瓶#     : 30 uL
进样体积    : Compound 4 (60%甲醇-TD).lcd
方法文件名  : XK-60%-甲醇-TD.lcm
数据文件    : XUK00.lcb
批处理文件  : XUK00.lcr
报告文件    : 2019-3-7 13:55:16
数据收集    : 2019-3-7 14:25:16
数据整理
    
```

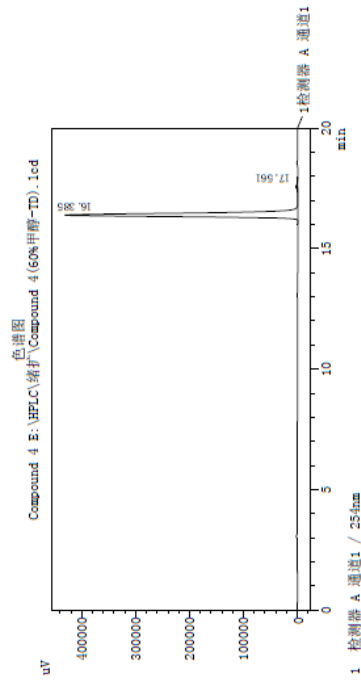

峰表

| 峰# | 保留时间   | 面积      | 高度     | 面积%     | 高度%     |
|----|--------|---------|--------|---------|---------|
| 1  | 17.661 | 425995  | 432281 | 99.176  | 99.182  |
| 2  | 17.581 | 55043   | 5559   | 0.823   | 0.817   |
| 总计 |        | 4261941 | 433840 | 100.000 | 100.000 |

# ==== Shimadzu LCsolution 分析报告 ====

样品信息

```

采集人       : Admin
样品名称     : Compound 4
样品ID      : 1
样品瓶#     : 49
样品瓶#     : 30 uL
进样体积    : Compound 4 (30%乙醇-TD).lcd
方法文件名  : XK-30%-乙醇-TD.lcm
数据文件    : XUK00.lcb
批处理文件  : XUK00.lcr
报告文件    : 2019-3-7 13:30:13
数据收集    : 2019-3-7 07:59:23
数据整理
    
```

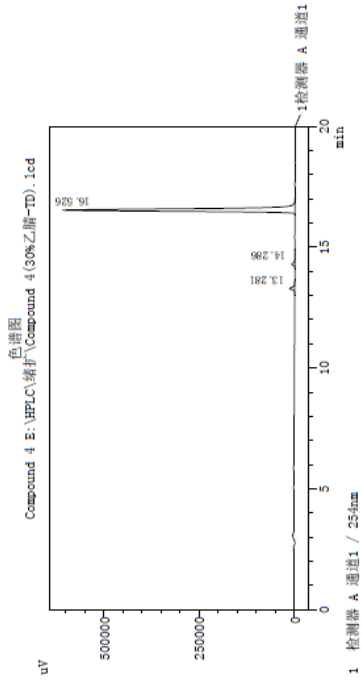

峰表

| 峰# | 保留时间   | 面积      | 高度     | 面积%     | 高度%     |
|----|--------|---------|--------|---------|---------|
| 1  | 13.281 | 96095   | 13107  | 2.120   | 2.067   |
| 2  | 14.285 | 67564   | 9166   | 1.491   | 1.416   |
| 3  | 16.526 | 485743  | 611821 | 96.388  | 96.487  |
| 总计 |        | 4831314 | 634096 | 100.000 | 100.000 |



# ==== Shimadzu LCsolution 分析报告 ====

样品信息  
 : Admin  
 : Compound 5  
 : 1  
 : 50  
 : 30 uL  
 : Compound 5 (60%甲醇-TD).1cd  
 : XE-60%-甲醇-TD.1cm  
 : XRU0.1cb  
 : 2019-3-6 14:48:44  
 : 2019-3-6 14:48:35

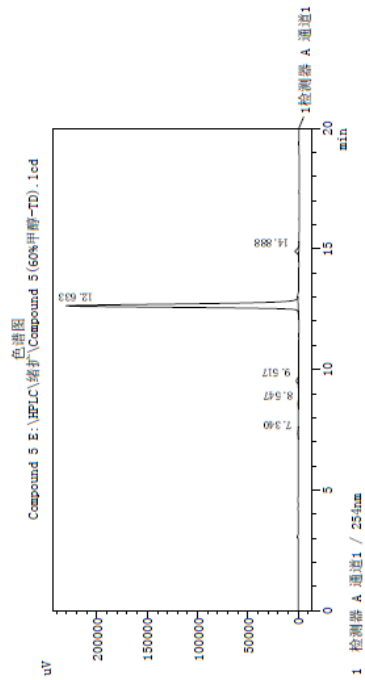

峰表

| 峰# | 保留时间   | 面积      | 高度     | 面积%     | 高度%     |
|----|--------|---------|--------|---------|---------|
| 1  | 7.36   | 5501    | 505    | 0.244   | 0.212   |
| 2  | 8.67   | 7281    | 643    | 0.333   | 0.270   |
| 3  | 9.57   | 29111   | 2315   | 1.305   | 0.973   |
| 4  | 12.633 | 2171335 | 230730 | 96.369  | 96.978  |
| 5  | 14.888 | 396512  | 3727   | 1.758   | 1.566   |
| 总计 |        | 2253243 | 237920 | 100.000 | 100.000 |

# ==== Shimadzu LCsolution 分析报告 ====

样品信息  
 : Admin  
 : Compound 5  
 : 1  
 : 50  
 : 30 uL  
 : Compound 5 (30%乙醇-TD).1cd  
 : XE-30%-乙醇-TD.1cm  
 : XRU0.1cb  
 : 2019-3-6 18:53:38  
 : 2019-3-7 07:54:32

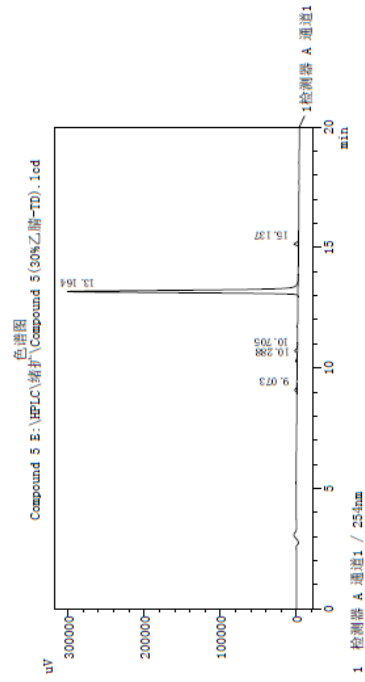

峰表

| 峰# | 保留时间   | 面积      | 高度     | 面积%     | 高度%     |
|----|--------|---------|--------|---------|---------|
| 1  | 7.073  | 23507   | 2022   | 1.017   | 0.857   |
| 2  | 8.92   | 18090   | 2172   | 0.805   | 0.952   |
| 3  | 9.5    | 24309   | 3315   | 1.083   | 1.017   |
| 4  | 13.164 | 2137994 | 302540 | 95.253  | 95.526  |
| 5  | 15.137 | 406535  | 5662   | 1.811   | 1.788   |
| 总计 |        | 2244533 | 316711 | 100.000 | 100.000 |

==== Shimadzu LCsolution 分析报告 ====

样品信息  
 采集人 : Admin  
 样品名称 : Compound 6  
 样品ID : 1  
 样品架# : 51  
 样品瓶# : 30 uL  
 进样体积 : Compound 6 (60%甲醇-TD).lcd  
 方法文件名 : XF-60%甲醇-TD.lcm  
 数据文件名 : XUKUO.lcb  
 批处理文件名 : XUKUO.lcr  
 采集日期 : 2013-3-6 14:42:10  
 数据文件 : 2013-3-6 15:05:12  
 数据处理 :

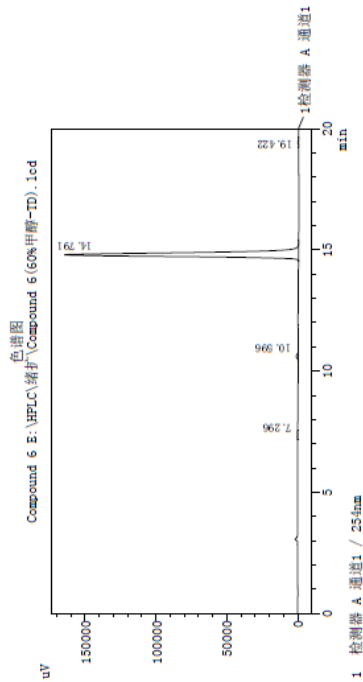

色谱图  
 Compound 6 E:\HPLC\维护\Compound 6 (60%甲醇-TD).lcd

1 检测器 A 通道1 / 254nm

峰表

| 峰# | 保留时间   | 面积      | 高度     | 面积%     | 高度%     |
|----|--------|---------|--------|---------|---------|
| 1  | 16.791 | 1776317 | 167072 | 100.000 | 100.000 |
| 2  | 10.996 | 483     | 0.241  | 0.027   | 0.289   |
| 3  | 7.296  | 165015  | 98.809 | 9.336   | 98.782  |
| 4  | 14.791 | 1755765 | 165015 | 98.809  | 98.782  |
| 总计 |        | 1776317 | 167072 | 100.000 | 100.000 |

==== Shimadzu LCsolution 分析报告 ====

样品信息  
 采集人 : Admin  
 样品名称 : Compound 6  
 样品ID : 1  
 样品架# : 51  
 样品瓶# : 30 uL  
 进样体积 : Compound 6 (30%乙醇-TD).lcd  
 方法文件名 : XF-30%乙醇-TD.lcm  
 数据文件名 : XUKUO.lcb  
 批处理文件名 : XUKUO.lcr  
 采集日期 : 2013-3-6 19:17:04  
 数据文件 : 2013-3-6 19:40:05  
 数据处理 :

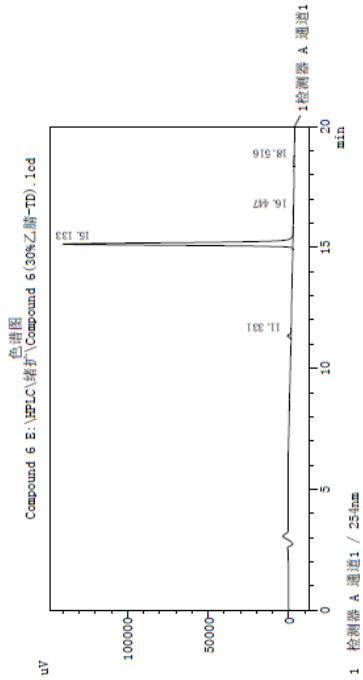

色谱图  
 Compound 6 E:\HPLC\维护\Compound 6 (30%乙醇-TD).lcd

1 检测器 A 通道1 / 254nm

峰表

| 峰# | 保留时间   | 面积      | 高度     | 面积%     | 高度%     |
|----|--------|---------|--------|---------|---------|
| 1  | 16.473 | 1089324 | 115136 | 100.000 | 100.000 |
| 2  | 11.331 | 16413   | 2257   | 1.507   | 1.552   |
| 3  | 15.133 | 1066632 | 147334 | 97.936  | 98.003  |
| 4  | 16.447 | 3299    | 345    | 0.303   | 0.337   |
| 总计 |        | 1089324 | 115136 | 100.000 | 100.000 |

# ==== Shimadzu LCsolution 分析报告 ====

样品信息  
 采集人 : Admin  
 样品名称 : Compound 7  
 样品ID : 1  
 样品架# : 52  
 进样体积 : 30 uL  
 数据文件名称 : Compound 7 (60%甲醇-TD).lcd  
 方法文件名 : XF-60%-甲醇-TD.lcm  
 样品ID : XUK001.ccb  
 采集日期 : 2019-3-6 15:05:37  
 采集位置 : 2019-3-6 15:13:01  
 数据处理

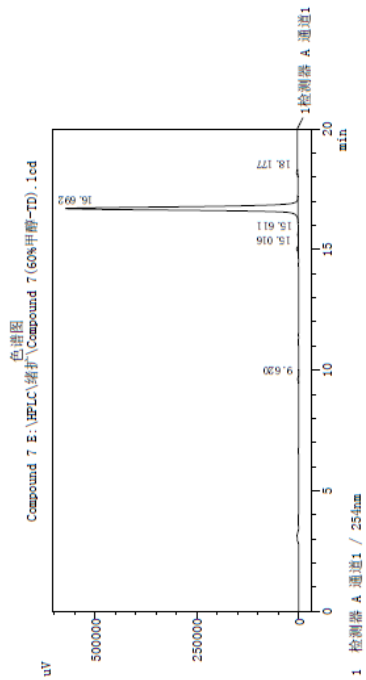

峰表

| 峰# | 保留时间   | 面积      | 高度     | 面积%     | 高度%     |
|----|--------|---------|--------|---------|---------|
| 1  | 9.620  | 17993   | 2083   | 0.318   | 0.358   |
| 2  | 15.016 | 10689   | 4152   | 0.179   | 0.714   |
| 3  | 15.611 | 16366   | 1749   | 0.289   | 0.301   |
| 4  | 16.692 | 5556452 | 570349 | 98.233  | 98.128  |
| 5  | 18.177 | 24529   | 2894   | 0.411   | 0.498   |
| 总计 |        | 5556435 | 581257 | 100.000 | 100.000 |

# ==== Shimadzu LCsolution 分析报告 ====

样品信息  
 采集人 : Admin  
 样品名称 : Compound 7  
 样品ID : 1  
 样品架# : 52  
 进样体积 : 30 uL  
 数据文件名称 : Compound 7 (30%乙醇-TD).lcd  
 方法文件名 : XF-30%-乙醇-TD.lcm  
 样品ID : XUK001.ccb  
 采集日期 : 2019-3-7 18:40:31  
 采集位置 : 2019-3-7 07:56:14  
 数据处理

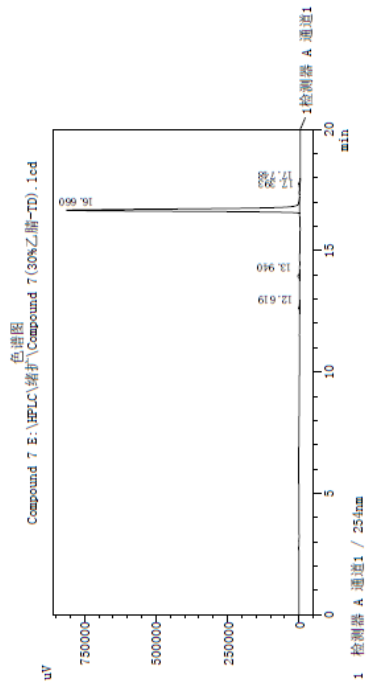

峰表

| 峰# | 保留时间   | 面积      | 高度     | 面积%     | 高度%     |
|----|--------|---------|--------|---------|---------|
| 1  | 12.619 | 20070   | 4149   | 0.691   | 0.892   |
| 2  | 12.916 | 48323   | 6442   | 0.878   | 0.773   |
| 3  | 15.660 | 5357531 | 816111 | 97.240  | 97.912  |
| 4  | 17.393 | 16389   | 1687   | 0.297   | 0.202   |
| 5  | 17.746 | 49242   | 5122   | 0.894   | 0.615   |
| 总计 |        | 5509615 | 833311 | 100.000 | 100.000 |

# ==== Shimadzu LCsolution 分析报告 ====

样品信息  
 采集人 : Admin  
 样品名称 : Compound 8  
 样品ID : 1  
 样品架# : 53  
 进样体积 : 30 uL  
 进样文件名称 : Compound 8 (60%甲醇-TD).1cd  
 方法文件名称 : XUKIO.icb  
 报告文件名 : XUKIO.icb  
 报告文件位置 : 2019-3-6 15:29:04  
 数据收集 : 2019-3-6 15:54:28  
 数据处理

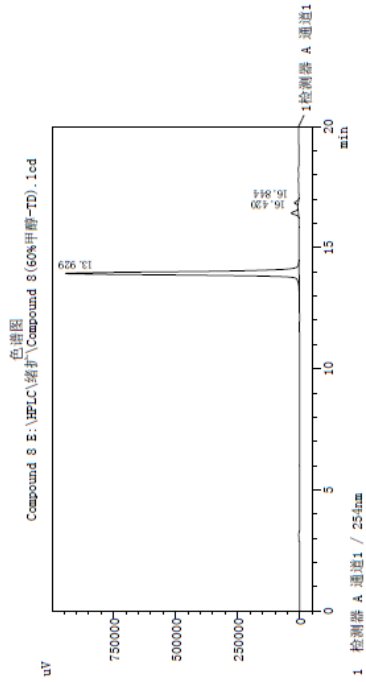

峰表

| 峰# | 保留时间   | 面积      | 高度     | 面积%     | 高度%     |
|----|--------|---------|--------|---------|---------|
| 1  | 13.929 | 8975892 | 940773 | 96.159  | 95.350  |
| 2  | 16.420 | 252002  | 26261  | 2.700   | 2.870   |
| 3  | 16.844 | 106544  | 13553  | 1.141   | 1.280   |
| 总计 |        | 9334139 | 964587 | 100.000 | 100.000 |

# ==== Shimadzu LCsolution 分析报告 ====

样品信息  
 采集人 : Admin  
 样品名称 : Compound 8  
 样品ID : 1  
 样品架# : 53  
 进样体积 : 30 uL  
 进样文件名称 : Compound 8 (30%乙醇-TD).1cd  
 方法文件名称 : XUKIO.icb  
 报告文件名 : XUKIO.icb  
 报告文件位置 : 2019-3-7 01:03:58  
 数据收集 : 2019-3-7 07:57:34  
 数据处理

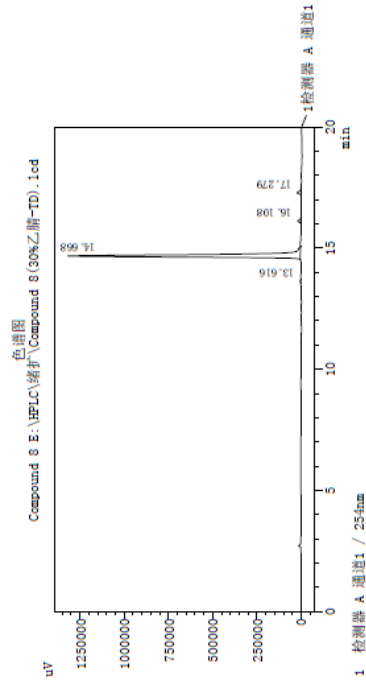

峰表

| 峰# | 保留时间   | 面积      | 高度      | 面积%     | 高度%     |
|----|--------|---------|---------|---------|---------|
| 1  | 13.416 | 16816   | 3636    | 0.183   | 0.267   |
| 2  | 14.868 | 8870039 | 1314073 | 96.479  | 96.608  |
| 3  | 16.108 | 132943  | 19362   | 1.446   | 1.423   |
| 4  | 17.279 | 173960  | 23146   | 1.892   | 1.702   |
| 总计 |        | 9198778 | 1360219 | 100.000 | 100.000 |

# ==== Shimadzu LCsolution 分析报告 ====

采集人 : Admin  
 样品名称 : Compound 9  
 样品ID : 1  
 样品架# : 54  
 样品瓶# : 30 uL  
 进样体积 : Compound 9 (60%甲醇-TD).lcd  
 数据文件名 : XR001.cb  
 方法文件名 : 2019-9-7  
 报告文件名 : 2019-9-7 07:39:29  
 数据文件 :  
 数据处理 :

采集人 : Admin  
 样品名称 : Compound 9  
 样品ID : 1  
 样品架# : 54  
 样品瓶# : 30 uL  
 进样体积 : Compound 9 (30%乙醇-TD).lcd  
 数据文件名 : XR001.cb  
 方法文件名 : 2019-9-7  
 报告文件名 : 2019-9-7 08:01:13  
 数据文件 :  
 数据处理 :

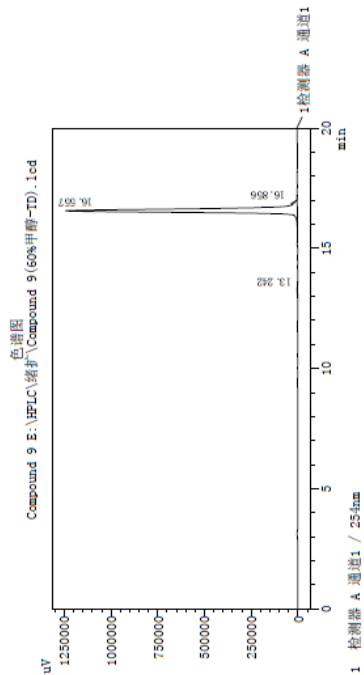

峰表

| 峰# | 保留时间   | 面积       | 高度      | 面积%     | 高度%     |
|----|--------|----------|---------|---------|---------|
| 1  | 13.242 | 55800    | 4391    | 0.510   | 0.350   |
| 2  | 16.587 | 12059614 | 1240172 | 99.001  | 98.786  |
| 3  | 16.856 | 55928    | 10845   | 0.489   | 0.864   |
| 总计 |        | 12181342 | 1255108 | 100.000 | 100.000 |

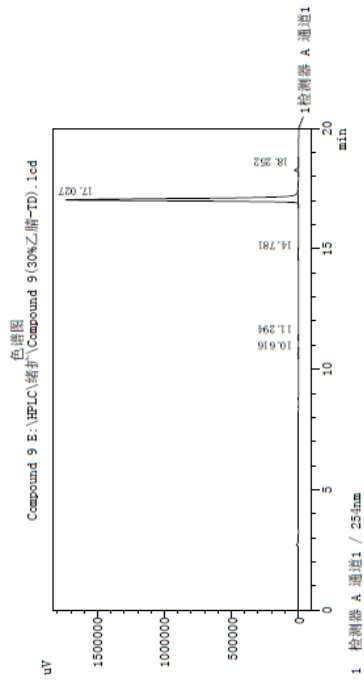

峰表

| 峰# | 保留时间   | 面积       | 高度      | 面积%     | 高度%     |
|----|--------|----------|---------|---------|---------|
| 1  | 10.616 | 34533    | 4487    | 0.283   | 0.283   |
| 2  | 11.294 | 22204    | 3837    | 0.182   | 0.216   |
| 3  | 14.781 | 44905    | 2537    | 0.367   | 0.443   |
| 4  | 17.027 | 11924803 | 1734735 | 97.547  | 97.744  |
| 5  | 18.252 | 498103   | 29174   | 1.651   | 1.644   |
| 总计 |        | 12221549 | 1774769 | 100.000 | 100.000 |

# ==== Shimadzu LCsolution 分析报告 ====

采集人 : Admin  
 样品名称 : Compound 10  
 样品ID : 1  
 样品架# : 55  
 样品瓶# : 30 uL  
 进样体积 : Compound\_10(60%甲醇-TD).lcd  
 方法文件名 : XF-60%-甲醇-TD.lcm  
 数据文件 : XRU0.icb  
 报告文件名 : XRU0.lcd  
 报告文件 : 2015-3-7 16:16:01  
 数据文件 : 2015-3-7 08:02:54  
 数据处理 :

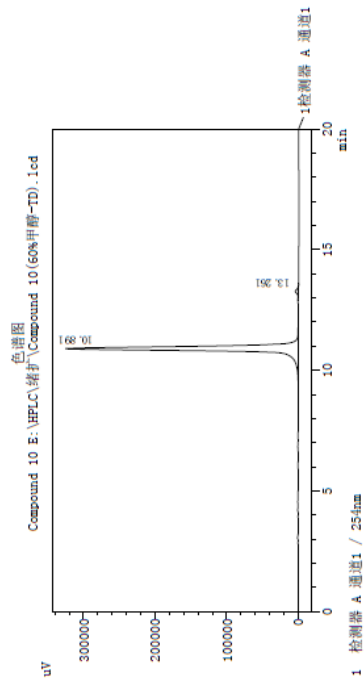

峰表

| 峰# | 保留时间   | 面积      | 高度     | 面积%     | 高度%     |
|----|--------|---------|--------|---------|---------|
| 1  | 10.881 | 3961183 | 324956 | 98.731  | 98.715  |
| 2  | 13.261 | 50900   | 4130   | 1.269   | 1.285   |
| 总计 |        | 4012083 | 329185 | 100.000 | 100.000 |

# ==== Shimadzu LCsolution 分析报告 ====

采集人 : Admin  
 样品名称 : Compound 10  
 样品ID : 1  
 样品架# : 55  
 样品瓶# : 30 uL  
 进样体积 : Compound\_10(30%乙醇-TD).lcd  
 方法文件名 : XF-30%-乙醇-TD.lcm  
 数据文件 : XRU0.icb  
 报告文件名 : XRU0.lcd  
 报告文件 : 2015-3-7 20:50:53  
 数据处理 : 2015-3-7 08:03:59

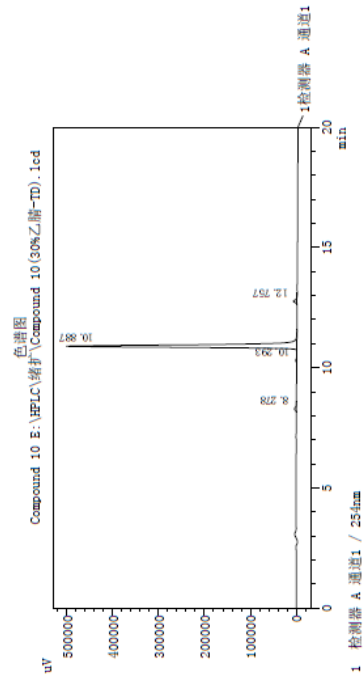

峰表

| 峰# | 保留时间   | 面积      | 高度     | 面积%     | 高度%     |
|----|--------|---------|--------|---------|---------|
| 1  | 8.278  | 33839   | 4680   | 0.969   | 0.904   |
| 2  | 10.293 | 18889   | 2387   | 0.510   | 0.461   |
| 3  | 10.887 | 3853535 | 502564 | 96.899  | 97.087  |
| 4  | 12.757 | 60037   | 8165   | 1.652   | 1.578   |
| 总计 |        | 3700299 | 517196 | 100.000 | 100.000 |

# ==== Shimadzu LCsolution 分析报告 ====

样品信息  
 采集人 : Admin  
 样品 ID : Compound 11  
 样品架# : 1  
 样品瓶# : 56  
 进样体积 : 30 uL  
 数据文件名 : Compound 11 (60%甲醇-TD).1cd  
 方法文件名 : XT-60%-甲醇-TD.1cm  
 积分文件名 : XUKO.icb  
 积分参数 : XUKO.icb  
 报告文件名 : 2019-3-7 13:16:41  
 数据文件 : 2019-3-7 13:39:43  
 数据处理

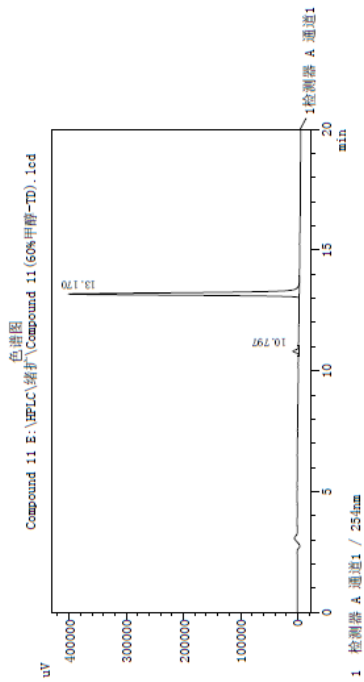

峰表

| 峰# | 保留时间   | 面积      | 高度     | 面积%     | 高度%     |
|----|--------|---------|--------|---------|---------|
| 1  | 10.797 | 164367  | 11575  | 2.556   | 2.767   |
| 2  | 13.170 | 7029857 | 406754 | 97.444  | 97.233  |
| 总计 |        | 7214224 | 418329 | 100.000 | 100.000 |

# ==== Shimadzu LCsolution 分析报告 ====

样品信息  
 采集人 : Admin  
 样品 ID : Compound 11  
 样品架# : 1  
 样品瓶# : 56  
 进样体积 : 30 uL  
 数据文件名 : Compound 11 (30%乙醇-TD).1cd  
 方法文件名 : XT-30%-乙醇-TD.1cm  
 积分文件名 : XUKO.icb  
 积分参数 : XUKO.icb  
 报告文件名 : 2019-3-7 08:26:10  
 数据文件 : 2019-3-7 08:49:13  
 数据处理

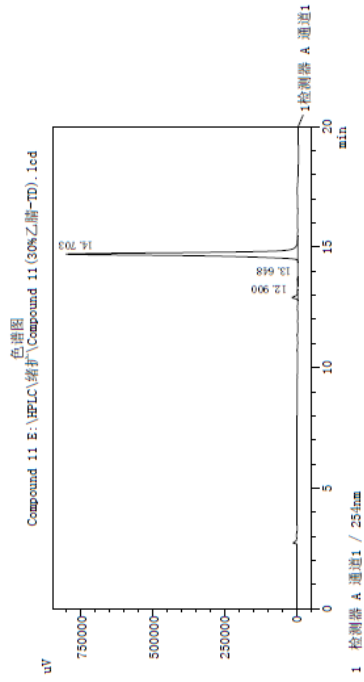

峰表

| 峰# | 保留时间   | 面积      | 高度     | 面积%     | 高度%     |
|----|--------|---------|--------|---------|---------|
| 1  | 12.906 | 132829  | 19136  | 1.821   | 2.320   |
| 2  | 13.648 | 12981   | 1595   | 0.178   | 0.193   |
| 3  | 14.703 | 7146927 | 804039 | 98.001  | 97.486  |
| 总计 |        | 7292738 | 824771 | 100.000 | 100.000 |

# ==== Shimadzu LCsolution 分析报告 ====

样品信息  
 采集人 : Admin  
 样品名称 : Compound 12  
 样品ID : 1  
 样品架# : 57  
 样品瓶# : 30 uL  
 进样体积 : Compound 12 (60%甲醇-TD).1cd  
 数据文件名 : XT-60%-甲醇-ID.1cm  
 方法文件名 : XRPC.1cb  
 报告文件名 : 2019-3-7 13:40:09  
 报告生成时间 : 2019-3-7 14:14:13  
 数据处理 :

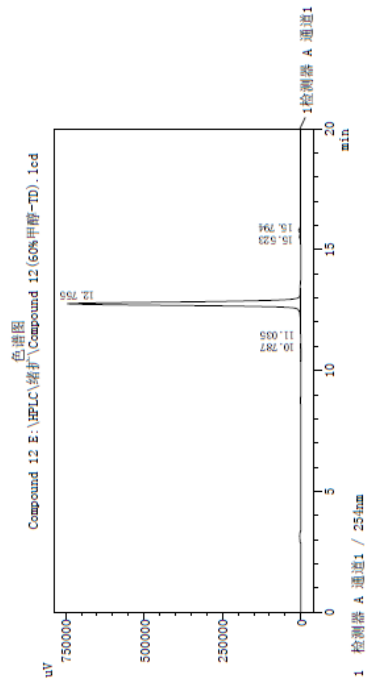

1 检测器 A 通道1 / 25-nm

峰表

| 峰# | 保留时间   | 面积      | 高度     | 面积%     | 高度%     |
|----|--------|---------|--------|---------|---------|
| 1  | 13.511 | 5375    | 363    | 0.073   | 0.048   |
| 2  | 11.035 | 729     | 90     | 0.010   | 0.012   |
| 3  | 12.755 | 731404  | 743367 | 98.672  | 98.876  |
| 4  | 15.523 | 33613   | 3737   | 0.453   | 0.495   |
| 5  | 15.794 | 58699   | 5784   | 0.792   | 0.768   |
| 总计 |        | 7412458 | 753362 | 100.000 | 100.000 |

# ==== Shimadzu LCsolution 分析报告 ====

样品信息  
 采集人 : Admin  
 样品名称 : Compound 12  
 样品ID : 1  
 样品架# : 57  
 样品瓶# : 30 uL  
 进样体积 : Compound 12 (30%乙醇-TD).1cd  
 数据文件名 : XT-30%-乙醇-TD.1cm  
 方法文件名 : XRPC.1cb  
 报告文件名 : 2019-3-7 08:49:38  
 报告生成时间 : 2019-3-7 09:39:03  
 数据处理 :

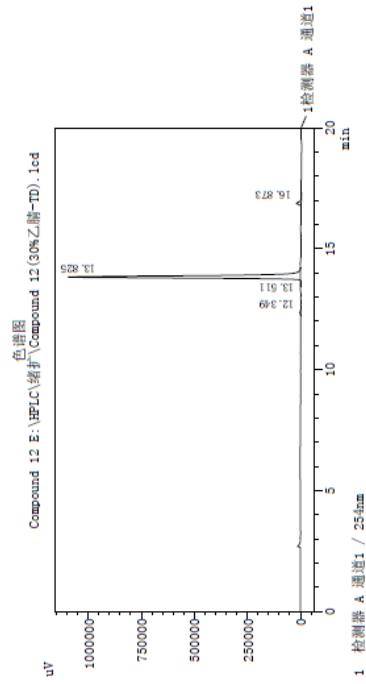

1 检测器 A 通道1 / 25-nm

峰表

| 峰# | 保留时间   | 面积      | 高度      | 面积%     | 高度%     |
|----|--------|---------|---------|---------|---------|
| 1  | 12.549 | 27276   | 4568    | 0.371   | 0.407   |
| 2  | 13.511 | 10164   | 1382    | 0.138   | 0.141   |
| 3  | 18.835 | 7143105 | 1094695 | 97.246  | 97.478  |
| 4  | 16.873 | 1648205 | 22171   | 2.244   | 1.974   |
| 总计 |        | 7348370 | 1123016 | 100.000 | 100.000 |



# ==== Shimadzu LCsolution 分析报告 ====

样品信息  
 采集人 : Admin  
 样品名称 : Compound 13  
 样品ID : 1  
 样品架# : 58  
 进样体积 : 30 uL  
 进样体积分 : Compound 13 (60%甲醇-TD).1cd  
 数据文件名 : XF-60%-甲醇-TD.1cm  
 方法文件名 : XRU0.1cb  
 报告文件名 : XRU0.1cr  
 报告文件路径 : C:\Users\Administrator\Desktop\2019-3-7 14:03:36  
 采集日期 : 2019-3-7 14:03:36  
 数据文件 : 2019-3-7 14:26:39  
 数据处理 :

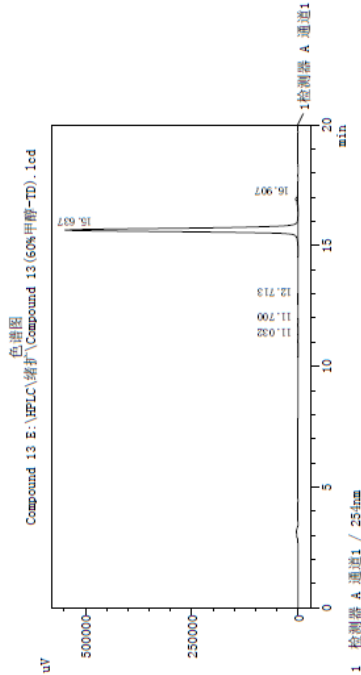

峰表

| 峰# | 保留时间   | 面积      | 高度     | 面积%     | 高度%     |
|----|--------|---------|--------|---------|---------|
| 1  | 11.032 | 7976    | 681    | 0.145   | 0.122   |
| 2  | 11.700 | 8786    | 801    | 0.160   | 0.144   |
| 3  | 12.713 | 4641    | 505    | 0.084   | 0.091   |
| 4  | 15.637 | 5409189 | 548612 | 98.361  | 98.573  |
| 5  | 16.907 | 60745   | 5952   | 1.250   | 1.069   |
| 总计 |        | 5499337 | 556551 | 100.000 | 100.000 |

# ==== Shimadzu LCsolution 分析报告 ====

样品信息  
 采集人 : Admin  
 样品名称 : Compound 13  
 样品ID : 1  
 样品架# : 58  
 进样体积 : 30 uL  
 进样体积分 : Compound 13 (30%乙醇-TD).1cd  
 数据文件名 : XF-30%-乙醇-TD.1cm  
 方法文件名 : XRU0.1cb  
 报告文件名 : XRU0.1cr  
 报告文件路径 : C:\Users\Administrator\Desktop\2019-3-7 09:36:11  
 采集日期 : 2019-3-7 09:36:11  
 数据处理 :

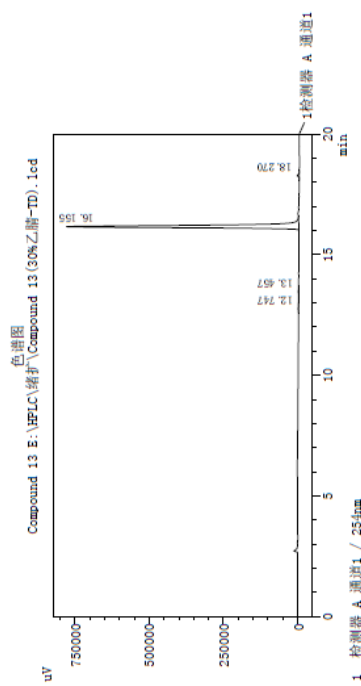

峰表

| 峰# | 保留时间   | 面积      | 高度     | 面积%     | 高度%     |
|----|--------|---------|--------|---------|---------|
| 1  | 12.747 | 10627   | 1321   | 0.199   | 0.167   |
| 2  | 13.457 | 16349   | 1579   | 0.306   | 0.199   |
| 3  | 16.155 | 5267538 | 782230 | 98.729  | 98.781  |
| 4  | 18.270 | 40863   | 6757   | 0.766   | 0.853   |
| 总计 |        | 5333373 | 791887 | 100.000 | 100.000 |

# ==== Shimadzu LCsolution 分析报告 ====

样品信息  
 采集人 : Admin  
 样品名称 : Compound 14  
 样品ID : 1  
 样品架# : 59  
 样品瓶# : 30 uL  
 进样体积 : Compound 14(60%甲醇-TD).1cd  
 数据文件名 : XT-60%-甲醇-TD.1cm  
 方法文件名 : XRM01.cb  
 报告文件名 : XRM01-1.r  
 采集日期 : 2019-3-7 14:37:05  
 数据收集 : 2019-3-7 15:04:50  
 数据处理 :

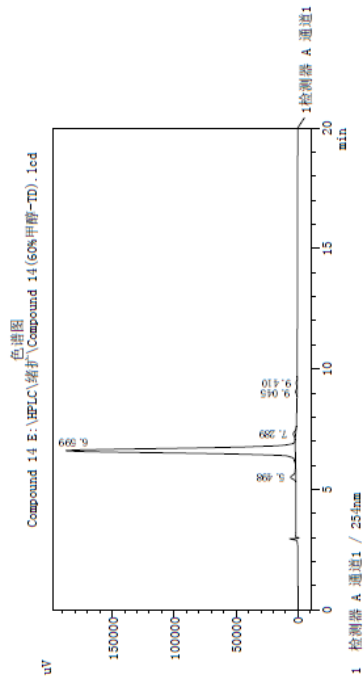

峰表

| 峰# | 保留时间  | 面积      | 高度     | 面积%     | 高度%     |
|----|-------|---------|--------|---------|---------|
| 1  | 5.498 | 52483   | 4132   | 2.061   | 2.169   |
| 2  | 6.599 | 2418759 | 185088 | 96.117  | 95.791  |
| 3  | 7.289 | 24326   | 1871   | 0.985   | 0.968   |
| 4  | 9.045 | 12363   | 1224   | 0.485   | 0.633   |
| 5  | 9.410 | 8955    | 846    | 0.352   | 0.438   |
| 总计 |       | 2546898 | 193220 | 100.000 | 100.000 |

# ==== Shimadzu LCsolution 分析报告 ====

样品信息  
 采集人 : Admin  
 样品名称 : Compound 14  
 样品ID : 1  
 样品架# : 59  
 样品瓶# : 30 uL  
 进样体积 : Compound 14(30%乙醇-TD).1cd  
 数据文件名 : XT-30%-乙醇-TD.1cm  
 方法文件名 : XRM01.cb  
 报告文件名 : XRM01-1.r  
 采集日期 : 2019-3-7 09:36:38  
 数据收集 : 2019-3-7 09:59:41  
 数据处理 :

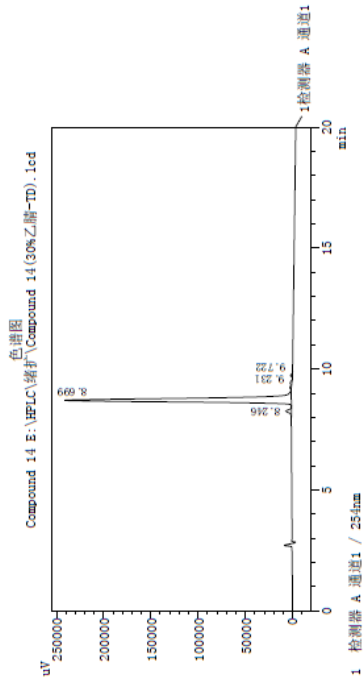

峰表

| 峰# | 保留时间  | 面积      | 高度     | 面积%     | 高度%     |
|----|-------|---------|--------|---------|---------|
| 1  | 5.498 | 49778   | 6276   | 2.053   | 2.512   |
| 2  | 6.599 | 233006  | 239956 | 96.424  | 96.081  |
| 3  | 7.289 | 25096   | 1618   | 1.035   | 0.648   |
| 4  | 9.045 | 11825   | 1946   | 0.488   | 0.779   |
| 总计 |       | 2424705 | 249796 | 100.000 | 100.000 |

# ==== Shimadzu LCsolution 分析报告 ====

样品信息  
 采集人 : Admin  
 样品名称 : Compound 15  
 样品ID : 1  
 样品架# : 1  
 样品瓶# : 60  
 进样体积 : 30 uL  
 数据文件名 : Compound\_15(60%甲醇-TD).1cd  
 方法文件名 : XT-60%甲醇-TD.1cm  
 数据文件 : XKU0.1cd  
 批处理文件名 : XKU0.1cd  
 报告文件名 : 2019-3-7 14:50:34  
 数据收集 : 2019-3-7 15:33:37  
 数据处理 :

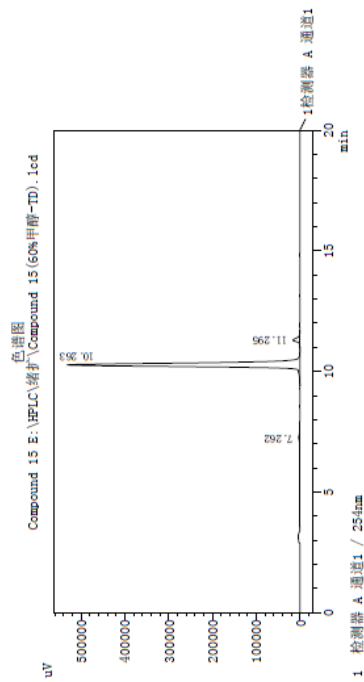

峰表

| 峰# | 保留时间   | 面积      | 高度     | 面积%     | 高度%     |
|----|--------|---------|--------|---------|---------|
| 1  | 7.262  | 53673   | 2342   | 0.517   | 0.423   |
| 2  | 10.283 | 523266  | 532148 | 96.418  | 96.565  |
| 3  | 11.295 | 161821  | 160410 | 2.965   | 2.911   |
| 总计 |        | 5437760 | 550830 | 100.000 | 100.000 |

# ==== Shimadzu LCsolution 分析报告 ====

样品信息  
 采集人 : Admin  
 样品名称 : Compound 15  
 样品ID : 1  
 样品架# : 1  
 样品瓶# : 60  
 进样体积 : 30 uL  
 数据文件名 : Compound\_15(30%乙醇-TD).1cd  
 方法文件名 : XT-30%乙醇-TD.1cm  
 数据文件 : XKU0.1cd  
 批处理文件名 : XKU0.1cd  
 报告文件名 : 2019-3-7 10:00:08  
 数据收集 : 2019-3-7 10:23:11  
 数据处理 :

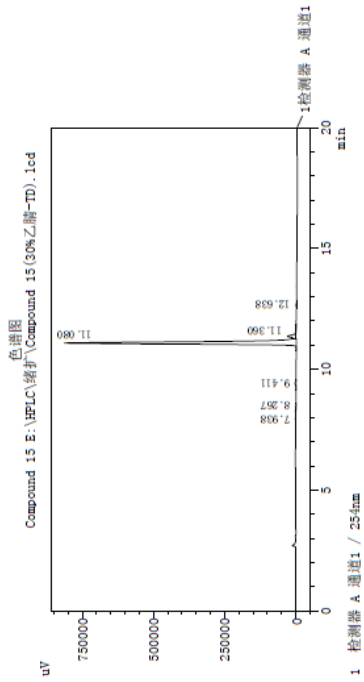

峰表

| 峰# | 保留时间   | 面积      | 高度     | 面积%     | 高度%     |
|----|--------|---------|--------|---------|---------|
| 1  | 7.335  | 10969   | 1305   | 0.203   | 0.133   |
| 2  | 8.267  | 10109   | 1183   | 0.187   | 0.135   |
| 3  | 9.411  | 29400   | 3743   | 0.543   | 0.439   |
| 4  | 11.000 | 513840  | 81435  | 94.890  | 95.411  |
| 5  | 11.560 | 212481  | 30782  | 3.923   | 3.605   |
| 6  | 12.638 | 14282   | 2192   | 0.264   | 0.257   |
| 总计 |        | 5445712 | 853609 | 100.000 | 100.000 |

# ==== Shimadzu LcSolution 分析报告 ====

采集人 : Admin  
 样品名称 : Compound 16  
 样品ID : 1  
 样品架# : 61  
 样品瓶# : 30 uL  
 进样体积 : Compound 16 (60%甲醇-TD).lcd  
 数据文件名 : XR-60%-甲醇-TD.lcm  
 方法文件名 : XRM001.cb  
 批处理文件名 : XRM001.cb  
 数据文件集 : 2019-3-7 15:44:02  
 数据日期 : 2019-3-7 15:37:05  
 数据处理 :

采集人 : Admin  
 样品名称 : Compound 16  
 样品ID : 1  
 样品架# : 61  
 样品瓶# : 30 uL  
 进样体积 : Compound 16 (30%乙醇-TD).lcd  
 数据文件名 : XRM001.cb  
 方法文件名 : XRM001.cb  
 批处理文件名 : XRM001.cb  
 数据文件集 : 2019-3-7 10:23:36  
 数据日期 : 2019-3-7 10:46:39  
 数据处理 :

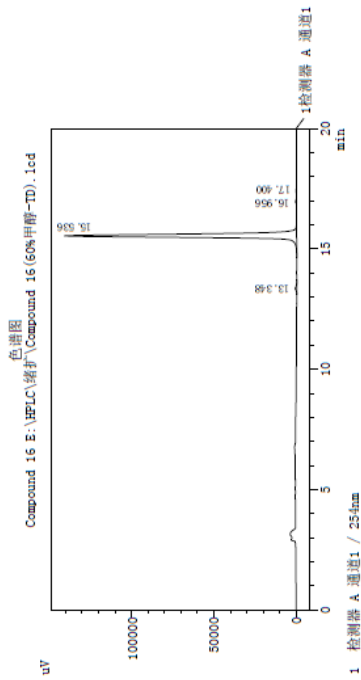

峰表

| 峰# | 保留时间   | 面积      | 高度     | 面积%     | 高度%     |
|----|--------|---------|--------|---------|---------|
| 1  | 13.348 | 8740    | 877    | 0.853   | 0.614   |
| 2  | 13.536 | 1319331 | 141162 | 98.870  | 98.763  |
| 3  | 16.956 | 4357    | 613    | 0.327   | 0.428   |
| 4  | 17.400 | 1978    | 250    | 0.148   | 0.173   |
| 总计 |        | 1334405 | 145921 | 100.000 | 100.000 |

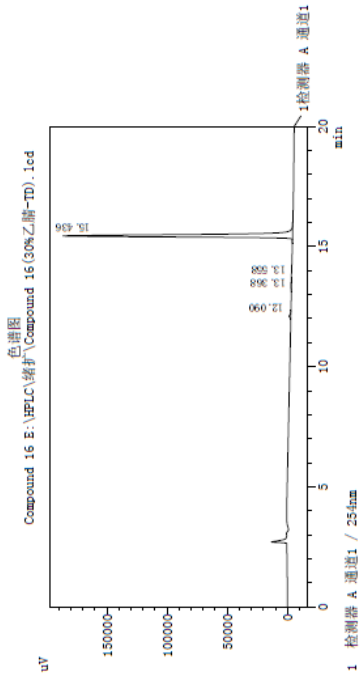

峰表

| 峰# | 保留时间   | 面积      | 高度     | 面积%     | 高度%     |
|----|--------|---------|--------|---------|---------|
| 1  | 12.050 | 8497    | 1374   | 0.662   | 0.713   |
| 2  | 13.368 | 39994   | 273    | 0.311   | 0.142   |
| 3  | 13.558 | 1078    | 182    | 0.084   | 0.094   |
| 4  | 15.436 | 1269881 | 190811 | 98.943  | 99.051  |
| 总计 |        | 1283150 | 152639 | 100.000 | 100.000 |

# ==== Shimadzu LCsolution 分析报告 ====

采集人 : Admin  
 样品名称 : Compound 17  
 样品 ID : 1  
 样品架# : 62  
 样品瓶# : 30 uL  
 进样体积 : Compound 17 (60%甲醇-TD).lcd  
 数据文件名 : XR-60%甲醇-TD.lcm  
 方法文件名 : XRM001.cb  
 批处理文件名 : XRM001.cb  
 数据文件 : 2019-9-7 15:37:31  
 数据收集 : 2019-9-7 16:00:34  
 数据处理 :

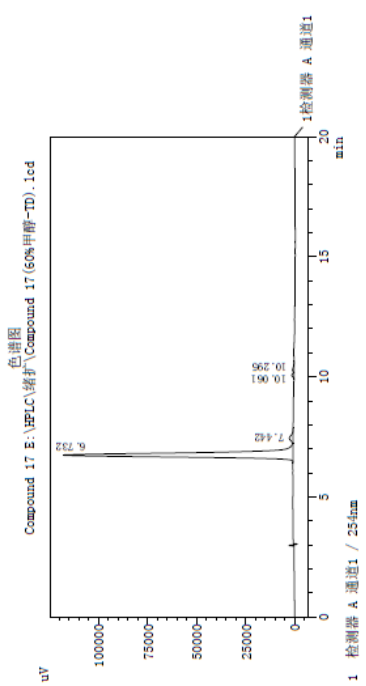

峰表

| 峰# | 保留时间   | 面积      | 高度     | 面积%     | 高度%     |
|----|--------|---------|--------|---------|---------|
| 1  | 6.732  | 1349366 | 117237 | 96.535  | 96.820  |
| 2  | 7.442  | 29419   | 1928   | 2.105   | 1.892   |
| 3  | 10.061 | 10540   | 1156   | 0.751   | 0.953   |
| 4  | 10.295 | 8477    | 765    | 0.606   | 0.633   |
| 总计 |        | 1387803 | 121057 | 100.000 | 100.000 |

# ==== Shimadzu LCsolution 分析报告 ====

采集人 : Admin  
 样品名称 : Compound 17  
 样品 ID : 1  
 样品架# : 62  
 样品瓶# : 30 uL  
 进样体积 : Compound 17 (30%乙醇-TD).lcd  
 数据文件名 : XR-30%乙醇-TD.lcm  
 方法文件名 : XRM001.cb  
 批处理文件名 : XRM001.cb  
 数据文件 : 2019-9-7 10:47:04  
 数据收集 : 2019-9-7 14:36:38  
 数据处理 :

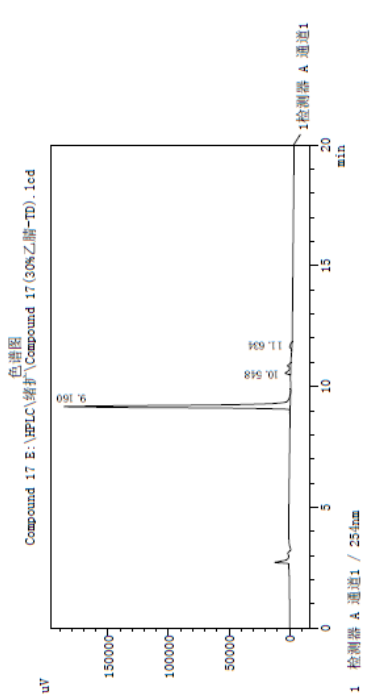

峰表

| 峰# | 保留时间   | 面积      | 高度     | 面积%     | 高度%     |
|----|--------|---------|--------|---------|---------|
| 1  | 9.150  | 1300054 | 186763 | 94.892  | 96.852  |
| 2  | 10.548 | 50836   | 4075   | 3.710   | 2.118   |
| 3  | 11.624 | 19286   | 1761   | 1.408   | 0.928   |
| 总计 |        | 1370175 | 192641 | 100.000 | 100.000 |

# ==== Shimadzu LCsolution 分析报告 ====

样品信息  
 采集人 : Admin  
 样品名称 : Compound 18  
 样品ID : 1  
 样品瓶# : 63  
 进样体积 : 30 uL  
 数据文件名称 : Compound 18 (60%甲醇-TD).1cd  
 方法文件名 : XF-60%甲醇-TD.1cm  
 数据文件 : XUKU0.1cb  
 报告文件名 : XUKU0.1cr  
 报告生成日期 : 2019-3-7 16:00:39  
 数据路径 : 2019-3-7 16:27:37  
 数据处理

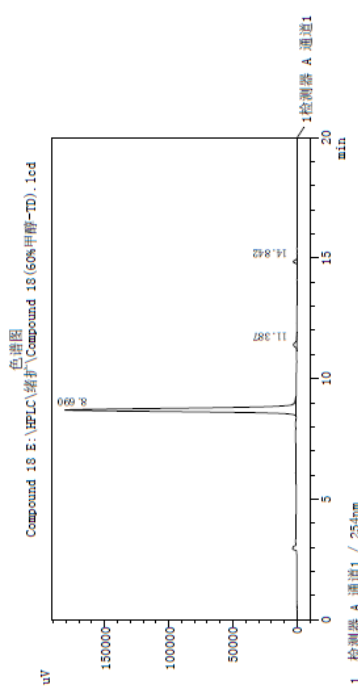

峰表

| 峰# | 保留时间   | 面积      | 高度     | 面积%     | 高度%     |
|----|--------|---------|--------|---------|---------|
| 1  | 11.387 | 1733559 | 180215 | 96.752  | 95.832  |
| 2  | 14.827 | 23231   | 9754   | 1.321   | 1.482   |
| 3  | 14.842 | 25867   | 3145   | 1.427   | 1.690   |
| 总计 |        | 1791747 | 186115 | 100.000 | 100.000 |

# ==== Shimadzu LCsolution 分析报告 ====

样品信息  
 采集人 : Admin  
 样品名称 : Compound 18  
 样品ID : 1  
 样品瓶# : 63  
 进样体积 : 30 uL  
 数据文件名称 : Compound 18 (30%乙醇-TD).1cd  
 方法文件名 : XF-30%乙醇-TD.1cm  
 数据文件 : XUKU0.1cb  
 报告文件名 : XUKU0.1cr  
 报告生成日期 : 2019-3-7 11:10:32  
 数据路径 : 2019-3-7 11:33:33  
 数据处理

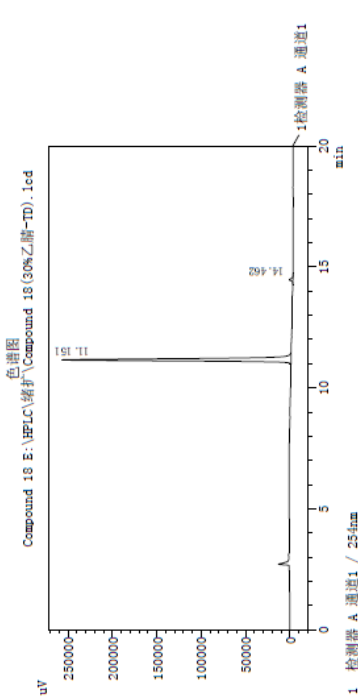

峰表

| 峰# | 保留时间   | 面积      | 高度     | 面积%     | 高度%     |
|----|--------|---------|--------|---------|---------|
| 1  | 11.151 | 1593630 | 237530 | 98.422  | 98.176  |
| 2  | 14.462 | 25533   | 3966   | 1.578   | 1.524   |
| 总计 |        | 1619163 | 261515 | 100.000 | 100.000 |
